# Supplementary material for: Genome-Wide Identification of the WRKY Gene Family and Functional Characterization of CpWRKY5 in Cucurbita pepo
Source: MDPI journal article supplement (doi:10.3390/ijms25084177), 2024-04-10
Supplement: s1 [file s1]

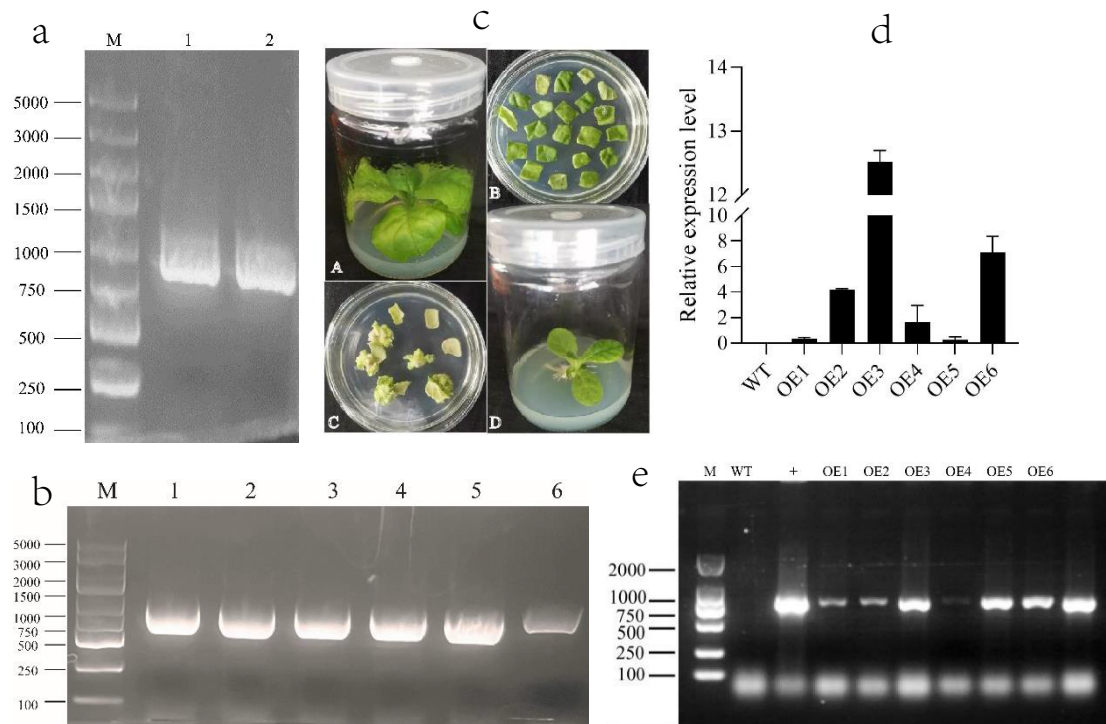

**Figure S4 Construction of transgenic tobacco and identification of positive plants**

a: *CpWRKY5* gene CDS cloning, b: PCR detection of pCambia2300-*CpWRKY5*-GFP, c: *Agrobacterium*-mediated SR tobacco genetic transformation (A: Cultivation of sterile tobacco, B: Overexpression of *CpWRKY5* was co-cultured with tobacco, C: Induced differentiation of tobacco overexpressing *CpWRKY5*, D: Rooting culture of tobacco overexpressing *CpWRKY5*), d: qRT-PCR detection of *CpWRKY5* overexpression tobacco, e: *CpWRKY5* overexpression tobacco genomic DNA detection (WT: Wild type SR tobacco, +: pCambia2300 – *CpWRKY5* positive plasmid, OE1-OE6: *CpWRKY5* overexpression tobacco)
