# Supplementary material for: Genome-Wide Identification of the WRKY Gene Family and Functional Characterization of CpWRKY5 in Cucurbita pepo
Source: MDPI journal article supplement (doi:10.3390/ijms25084177), 2024-04-10
Supplement: s1 [file s1]

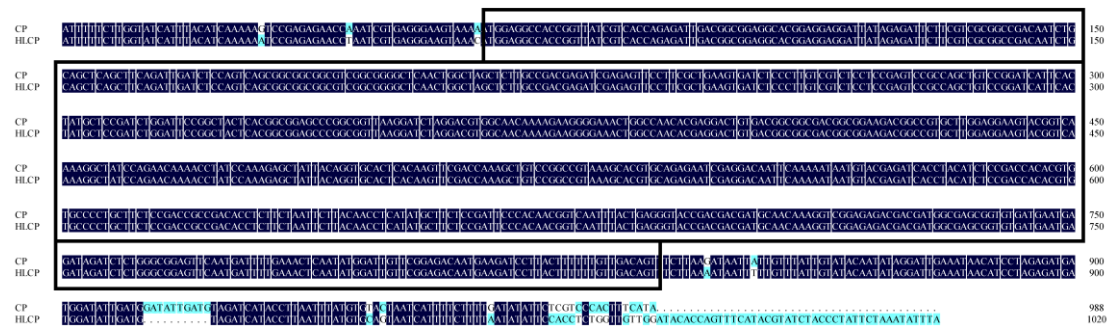

Figure S3 Sequence alignment of *CpWRKY5* gene

CP: Hulled *Cucurbita pepo*, HLCP: Hull-less *Cucurbita pepo*. The CDS area is circled out.
