# Supplementary material for: Genome-Wide Identification of the WRKY Gene Family and Functional Characterization of CpWRKY5 in Cucurbita pepo
Source: MDPI journal article supplement (doi:10.3390/ijms25084177), 2024-04-10
Supplement: s1 [file s1]

|           |                                                    |                                             |    |
|-----------|----------------------------------------------------|---------------------------------------------|----|
| CpWRKY6N  | DDGYNWRKYGQKQVKGGEFPRSYRKCTHPN...                  | CPVRKKKVERS. L. EGQVTEI I YKGEHNHKQ         | 58 |
| CpWRKY10N | DDGYNWRKYGQKQVKGSENPRSYRKCTFPN...                  | CPTKKKVERS. L. DGQI TEI VYKGSNNHPK          | 58 |
| CpWRKY13N | NDGYNWRKYGQKQVKGSENPRSYRKCTFPN...                  | CPTKKKVERS. L. DGQI TEI VYKGSNNHAK          | 58 |
| CpWRKY14N | . DDGYNWRKYGQKQVKGSKYPRSYRKCTHPS...                | CPVKKKVERS. L. DGKI AEI VYKGEHDHPK          | 57 |
| CpWRKY20N | EDGYNWRKYGQKLVKGNVFRSYRKCTHPT...                   | CMVKKQLERT. H. DGKI TDI I YFGPHDHPR         | 58 |
| CpWRKY26N | DDGYNWRKYGQKLVKGSENPRSYRKCTHPT...                  | CPVRKQVEKS. L. NGQI TEI VYKSKNNHPK          | 58 |
| CpWRKY37N | EDGYNWRKYGQKQVKGSEYPRSYRKCTHPN...                  | CQVKKKVERS. N. EGH I TEI I YKGTNNHPK        | 58 |
| CpWRKY38N | DDGYNWRKYGQKHVKGSEFPRSYRKCTHPN...                  | CEVKKLFERS. H. DGQI VDI I YKGTTHDHPK        | 58 |
| CpWRKY39N | DDGYNWRKYGQKQVKGSEFPRSYRKCTYPN...                  | CPVKKKVERS. L. EGH I TEI I YKGEHNHER        | 58 |
| CpWRKY55N | DDGYNWRKYGQKHVKGSEFPRSYRKCTHPN...                  | CEVKKLFERS. H. DGQI TDI VYKGTTHDHPK         | 58 |
| CpWRKY56N | EDGYNWRKYGQKQVKGSEYPRSYRKCTHPN...                  | CQVKKKVERS. H. EGH I TEI I YKGTNNHVK        | 58 |
| CpWRKY68N | EDGYNWRKYGQKQVKGSEYPRSYRKCTHPN...                  | CQVKKKVERS. L. DGQI TEI I YKGAHI HAK        | 58 |
| CpWRKY69N | . DDGYNWRKYGQKQVKGSPKGRSYRKCTYSE...                | CCAKKI EECDD. H. SGHRT E I VYRSQHSHPD       | 57 |
| CpWRKY76N | EDGYNWRKYGQKQVKGSEYPRSYRKCTHPN...                  | CI VKKKVERS. L. DGQI TEI I YTAHNNHSK        | 58 |
| CpWRKY6C  | DDGYRWRKYGQKI VKGNNPYPRSYRKCTTSG...                | CNVRKHHVERA. SHDPKAVI TTYEGKHHN...          | 57 |
| CpWRKY10C | DDGYRWRKYGQKVVKGNNPNPRSYRKCTNPG...                 | CPVRKHHVERA. SHDLRAVI TTYEGKHHN...          | 57 |
| CpWRKY13C | . DDGYRWRKYGQKVVKGNNPNPRSYRKCTSLG...               | CTVRKHI ERA. ANDMRAVI TTYEGKHHN...          | 56 |
| CpWRKY14C | . . GI RWRKYGQKVVKGNNLYPRSYRKCTGLK...              | CKARKYVERA. SEDPDSFI TTYEGKHHN...           | 55 |
| CpWRKY20C | NDGYRWRKYGQKLVKGNPNPRSYRKCTSSPG...                 | CPVKKHVERA. SHDPKVVLT TTYEGHHDDH...         | 57 |
| CpWRKY26C | DDGYWWRKYGQKV...                                   | CTYAG... CGVRKHI ERA. SHDLKAVI TTYEGKHHN... | 45 |
| CpWRKY37C | DDGYRWRKYGQKVVKGNNPNPRSYRKCTNPG...                 | CTVRKHHVERA. SHDLKSVI TTYEGKHHN...          | 57 |
| CpWRKY38C | DDGYRWRKYGQKVVKGNNPNPRSYRKCTNVG...                 | CPVRKHHVERA. SHDPKAVI TTYEGKHHN...          | 57 |
| CpWRKY39C | DDGYRWRKYGQKTVKGNPNPYRA...                         |                                             | 22 |
| CpWRKY55C | . . . . . SYRKCTNVG...                             | CPVRKHHVERA. SHDPKAVI TTYEGKHHN...          | 36 |
| CpWRKY56C | DDGYRWRKYGQKVVKGNNPNPRSYRKCTNPG...                 | CTVRKHHVERA. SHDLKSVI TTYEGKHHN...          | 57 |
| CpWRKY68C | EDGYRWRKYGQKVVKGNNPNPRSYRKCTSAG...                 | CAVRKHHVERA. SHDLKCVI TTYEGKHHN...          | 57 |
| CpWRKY69C | . DDGYRWRKYGQKVVKGSPHPRNYRCTSAG...                 | CPVRKHI ESA. VENPYAVI I TTYEGVHDDH...       | 56 |
| CpWRKY76C | EDGYRWRKYGQKVVKGNNPNPRSYRKCTSAG...                 | CSVRKHHVERA. SHDLKCVI TTYEGKHHN...          | 57 |
| CpWRKY8   | . DGYQWRKYGQKVTRDNPSPRAYFKCSSAPN...                | CPVKKKVQRS. LEDPTI LVATYEGEHSHAS            | 59 |
| CpWRKY12  | . DGYQWRKYGQKVTRDNPSPRAYFKCSFAPT...                | CPVKKKVQRS. VEDQSI LVATYEGEHNHPQ            | 59 |
| CpWRKY16  | . DGYQWRKYGQKVTRDNPSPRAYFKCSFAPT...                | CPVKKKVQRS. VEDQSVLVATYEGEHNHPQ             | 59 |
| CpWRKY29  | . DGYQWRKYGQKVTRDNPSPRAYFKCSSAPN...                | CPVKKKVQRS. LEDPAI LVATYEGEHNHAS            | 59 |
| CpWRKY32  | . DGYQWRKYGQKVTKDNPSPRAYFKCSFAPS...                | CPVKKKVQRS. VQDSSVLVATYEGEHNHKK             | 59 |
| CpWRKY33  | DDGFKWRKYGKKMVKNSPNRNYRKCSVEG...                   | CPVKKRVERD. RDDPKYVI TTYEGVHTHES            | 59 |
| CpWRKY45  | DDGYKWRKYGQKSI KNSPNPRSYRKCSNPR...                 | CSAKKQVERS. IEDDPTFVI TYEGHLHFA             | 59 |
| CpWRKY71  | QDGEKWRKYGKKS I KNNPNPRNYRKCSSSG...                | CGVKKRVERD. REDSSYVI TTYEGI HSHE            | 59 |
| CpWRKY1   | NDGCQWRKYGQKI AKGNPCPRAYYRCTVAPG...                | CPVRKQVQRC. LEDMSI LI TTYEGTHNHP L          | 60 |
| CpWRKY44  | . DGCQWRKYGQKMAKGNPCPRAYYRCTMAVG...                | CPVRKQVQRC. AEDRTI LI TTYEGNHNHP L          | 59 |
| CpWRKY58  | . DGCQWRKYGQKMAKGNPCPRAYYRCTMAAG...                | CPVRKQVQRC. AEDKTI LI TTYEGNHNHP L          | 59 |
| CpWRKY73  | . DGCQWRKYGQKMAKGNPCPRAYYRCTMAVG...                | CPVRKQVQRC. AEDTTI LI TTYEGNHNHP L          | 59 |
| CpWRKY74  | NDGCQWRKYGQKI AKGNPCPRAYYRCTGSP T...               | CPVRKQVQRC. ADDMSI LI TTYEGNHNHP L          | 60 |
| CpWRKY3   | DDGYRWRKYGQKAVKHS THPRSYYRCTHHT...                 | CNVKKQI QRH. SKDPTI VVTYEGI HNHP S          | 59 |
| CpWRKY15  | DDGYRWRKYGQKAVKNNKFRSYRKCTHQG...                   | CNVKKQVQRL. TRDEGVVVT TYEGMHTHS I           | 59 |
| CpWRKY17  | DDGYKWRKYGQKAVKNNKFRSYRKCTHQG...                   | CKVKKQVQRL. TRDEGVVVT TYEGI HSHPI           | 59 |
| CpWRKY18  | DDGYRWRKYGQKAVKNS PYPRSYRCTTVG...                  | CGVKKRVERL. SNDSHTVVT TYEGKTHQS             | 59 |
| CpWRKY19  | DDGYKWRKYGQKVVKNS LHPRSYYRCTHNN...                 | CRVKKRVERL. SEDCRMVI TTYEGRHNSP             | 59 |
| CpWRKY22  | EDGYRWRKYGQKAVKNS PYPRSYRCTSQK...                  | CVVKKRVERS. YQDPSLVI TTYEGQHI HHC           | 59 |
| CpWRKY31  | EDGYRWRKYGQKAVKNS PFP RSYRKCTNSK...                | CTVKKRVERS. SDDPTVVI TTYEGQHCHHT            | 59 |
| CpWRKY34  | DDGYRWRKYGQKAVKNS PYPRSYRCTTSQ...                  | CGVKKRVERS. SDDPSI VI TTYEGQTHQS            | 59 |
| CpWRKY41  | EDGYRWRKYGQKAVKNS AYP RSYRKCTTQK...                | CGVKKRVERS. YEDPSI VI TTYEGQHHP I           | 59 |
| CpWRKY42  | DDGYKWRKYGQKVVKNTLHPRSYYRCTEEN...                  | CKVKKRVERL. AEDPRMVI TTYEGRHAHS P           | 59 |
| CpWRKY47  | EDGYRWRKYGQKAVKNS PFP RSYRKCTNSK...                | CTVKKRVERS. SEDPSVVI TTYEGQHCHHT            | 59 |
| CpWRKY48  | DDGYRWRKYGQKAVKNS PYPRSYRCTTAG...                  | CGVKKRVERS. SDDPSVVT TYEGQHI HQS            | 59 |
| CpWRKY50  | EDGYRWRKYGQKAVKNS PYPRSYRCTSV A...                 | CNVKKRVERY. LKDP SI VVT TYEGQHTHS S         | 59 |
| CpWRKY60  | EDGYRWRKYGQKAVKNS PFP RSYRKCTSQK...                | CLVKKRVERS. YQDPSVVI TTYEGQHNNHC            | 59 |
| CpWRKY61  | DDGYKWRKYGQKVVKNTQHP RSYRKCTQDH...                 | CRVKKRVERL. AEDPRMVI TTYEGRHVHS P           | 59 |
| CpWRKY63  | EDGYRWRKYGQKAVKNS PFP RSYRKCTSQN...                | CSVKKRVERS. IEDPCFVVT TYEGKHHNYC            | 59 |
| CpWRKY64  | DDGYRWRKYGQKAVKNS PYPRSYRCTTAG...                  | CGVKKRVERS. SHDPSVVT TYEGQHNNQS             | 59 |
| CpWRKY65  | EDGYRWRKYGQKAVKNS PYPRSYRCTSV A...                 | CHVKKRVERC. LKDP SI VI TTYEGQHTHS T         | 59 |
| CpWRKY7   | . DDYS WRKYGQKPI KGS PHPRGYKCSSLRG...              | CPARKHVERA. LDPTMLI VTYENDHNNHA L           | 59 |
| CpWRKY9   | . DEYS WRKYGQKPI KGS PYPRGYKCSSMRG...              | CPARKHVERD. PNDPAML I VTYEGEHRHTQ           | 59 |
| CpWRKY23  | . DEYS WRKYGQKPI KGS PYPRGYRC SAVKG...             | CPARKHVERA. RDDPAML VTYEGDHRHP P            | 59 |
| CpWRKY24  | . DEYS WRKYGQKPI KGS PHPRGYKCSSMRG...              | CPARKHVERC. LQDPSMLI VTYEGEHNHP T           | 59 |
| CpWRKY27  | . DDYS WRKYGQKPI KGS PYPRGYKCSSLRG...              | CPARKHVERA. SDDPSMLI VTYEGDHNSH Q           | 59 |
| CpWRKY28  | . DDYS WRKYGQKPI KGS PHPRGYKCSSLRG...              | CPARKHVERA. LDPTMLI VTYENDHNNHA H           | 59 |
| CpWRKY30  | . DEFS WRKYGQKPI KGS PYPRAYYKCS TMRG...            | CPARKHVERN. KDDPAML I I TYEGEHRHTP          | 59 |
| CpWRKY43  | . DDYS WRKYGQKPI KGS PHPRGYKCSSVRG...              | CPARKHVERA. GDDPAML VTYEGEHNHTL             | 59 |
| CpWRKY57  | . DDYS WRKYGQKPI KGS PHPRGYKCSSMRG...              | CPARKHVERC. LEDPSMLI VTYEGEHNHP K           | 59 |
| CpWRKY62  | . DDYS WRKYGQKPI KGS PYPRGYKCSSLRG...              | CPARKHVERA. SDDPTMLI VTYEGDHNSH S           | 59 |
| CpWRKY66  | . DDYS WRKYGQKPI KGS PHPRGYKCSSMRG...              | CPARKHVERC. VEEDPSMLI VTYEGEHNHP R          | 59 |
| CpWRKY70  | . DEYS WRKYGQKPI KGS PYPRGYRCSTVKG...              | CPARKKVERV. RDDPTML VTYEGDHRHP Q            | 59 |
| CpWRKY72  | . DDYS WRKYGQKAI KG. . . . GYKCSSMRG...            | CPARKHVERA. VDDPAI LVVTYEGEHNHTL            | 54 |
| CpWRKY4   | . DS WG WRKYGQKPI KGS PYPRSYRKCSSSKG...            | CSARKQVERS. FSDPDVFI VTYTAENHNAE            | 59 |
| CpWRKY11  | . . FWS WRKYGQKPI KGS PYPRGYRCSTTKG...             | CSAKKQVERC. KTDGSMFI I TYS THNNHP G         | 58 |
| CpWRKY21  | . DS WA WRKYGQKPI KGS PYPRGYRCSSSKG...             | CPARKQVERS. RVDPTKLVI TYSFDHNNQL            | 59 |
| CpWRKY25  | . DMWA WRKYGQKPI KGS PYPRNYRCSSSKG...              | CGARKQVERS. TADPETFI VTYTG DHTHP R          | 59 |
| CpWRKY35  | . DI WA WRKYGQKPI KGS PYPRGYRCSSSKG...             | CMARKQVERN. RSDPGMFI VTYTAENHNP A           | 59 |
| CpWRKY40  | . DL WA WRKYGQKPI KGS PYPRGYRCSSSKG...             | CSARKQVERS. LTDPNMLVI TYS EHNHP W           | 59 |
| CpWRKY51  | . DMWA WRKYGQKPI KGS PYPRNYRCSSSKG...              | CGARKQVERS. NADPESFI I TYTEGEHI HPR         | 59 |
| CpWRKY54  | . DS WG WRKYGQKPI KGS PYPRSYRKCSSSKG...            | CSARKQVERS. LSDPGAFVVTYTAENHNAE             | 59 |
| CpWRKY59  | . DS WA WRKYGQKPI KGS PYPRGYRCSSSKG...             | CPARKQVERS. RVDPTKLVI TYAFDHNHQL            | 59 |
| CpWRKY75  | . DS WA WRKYGQKPI KGS PYPRAYYRCSSSKG...            | CPARKQVERN. RL DPTMLI TYSCEHNHS G           | 59 |
| CpWRKY2   | EDGYS WRKYGQKDI LGATYPRSYRKCTFRNTQNCWAVKQVRS...    | DEDP SVEFI TYRGKHTCS Q                      | 62 |
| CpWRKY5   | EDGRA WRKYGQKAI QNKTYPKSYRCHTFKFDQS...             | CPAVKHHVQRI EDNSKI MYEI TYI S DHTCAP        | 63 |
| CpWRKY36  | NDGYS WRKYGQKDI HGANFRCPCYRCHTRNVRGCLATKQVQS...    | DNDPNI FEVTRYGRKHTCNQ                       | 62 |
| CpWRKY49  | . DGFS WRKYGQKDI LGS KFPRGYFRCSHRFTLGCKATKQVQKS... | DNDPTI YEVTYKGTHTCNR                        | 61 |
| CpWRKY52  | DDGFC WRKYGQKGI LGARHPRGYRCHTRNLQGLATKQVQRS...     | DHPDPNVFEI TYRGTHSCTQ                       | 62 |
| CpWRKY53  | EDGYS WRKYGQKDI LGATFPRSYRKCTFRNTQNCWAI KQVRS...   | DEDP SVEFI TYRGKHTCS Q                      | 62 |
| CpWRKY67  | DDGFS WRKYGQKDI LGS KFPRGYFRCSHRFAQGCSATKQVQRL...  | DNDPS MYEI TYRGKHTCNK                       | 62 |

Figure S1 Alignment of 76 CpWRKY WRKY domain sequences. For Group I WRKY proteins, N-terminal and C-terminal WRKY domains are represented by 'N' and 'C', respectively. The typical amino acid residues within WRKY domain and zinc-finger motif are in red color.
