# Supplementary material for: Genome-Wide Identification of the WRKY Gene Family and Functional Characterization of CpWRKY5 in Cucurbita pepo
Source: MDPI journal article supplement (doi:10.3390/ijms25084177), 2024-04-10
Supplement: s1 [file s1]

## Motif 1

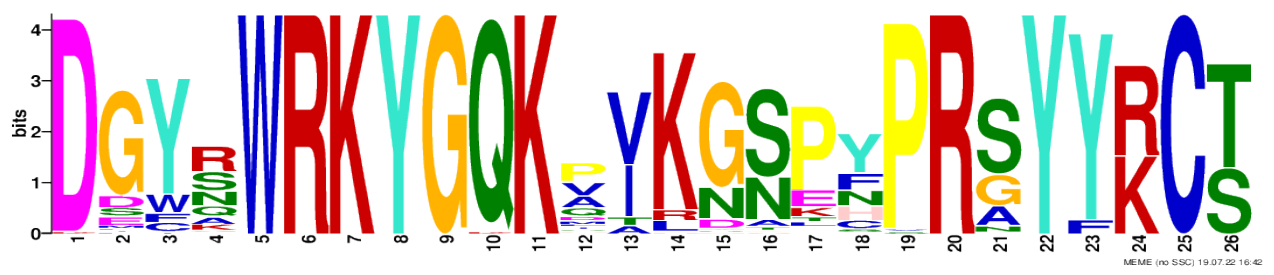

## Motif 2

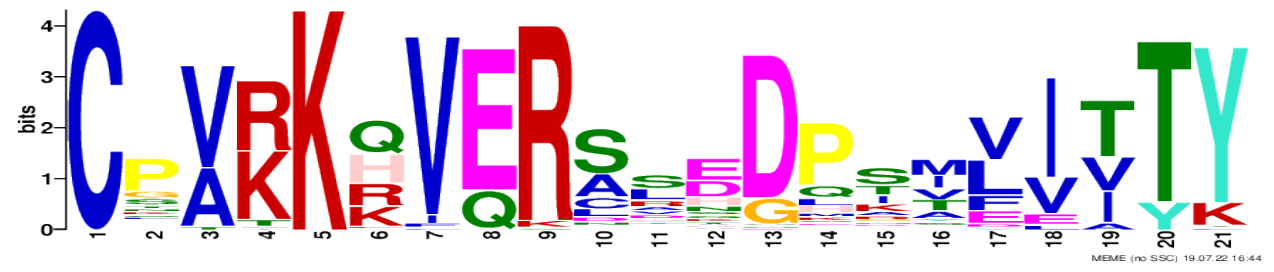

### Motif 3

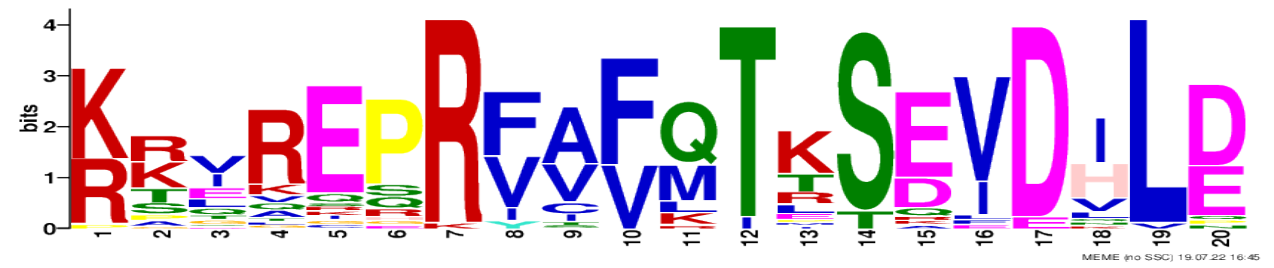

## Motif 4

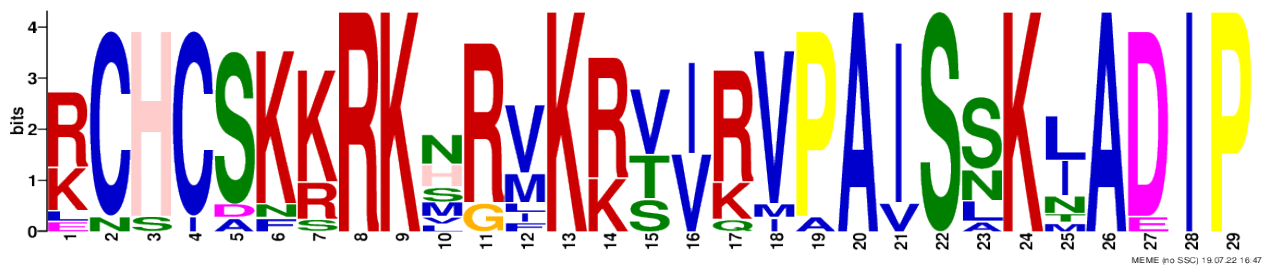

## Motif 5

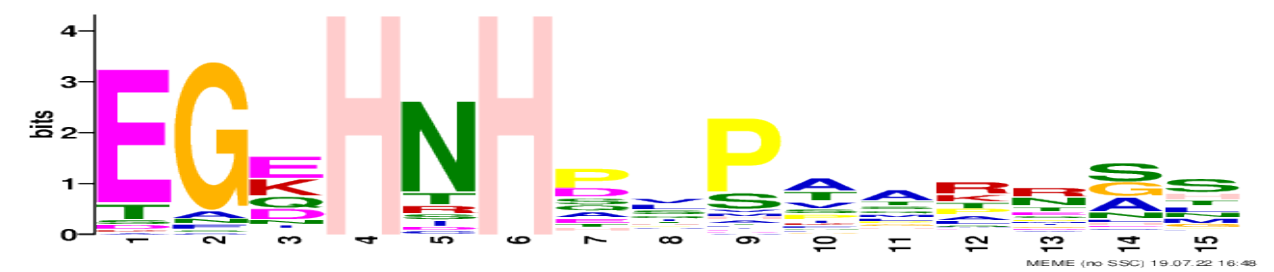

## Motif 6

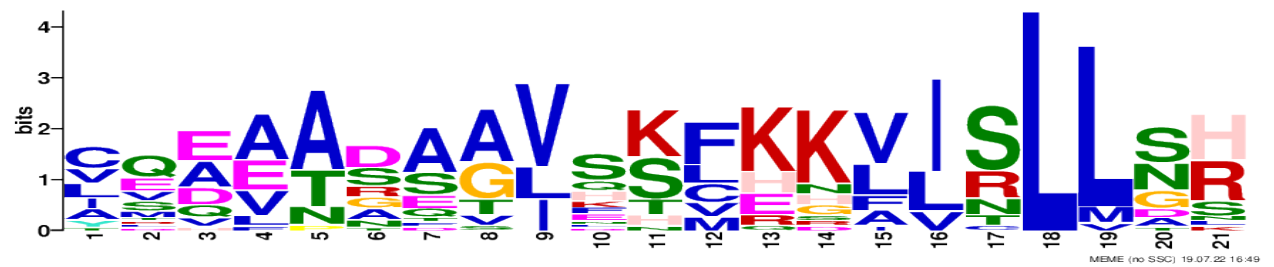

## Motif 7

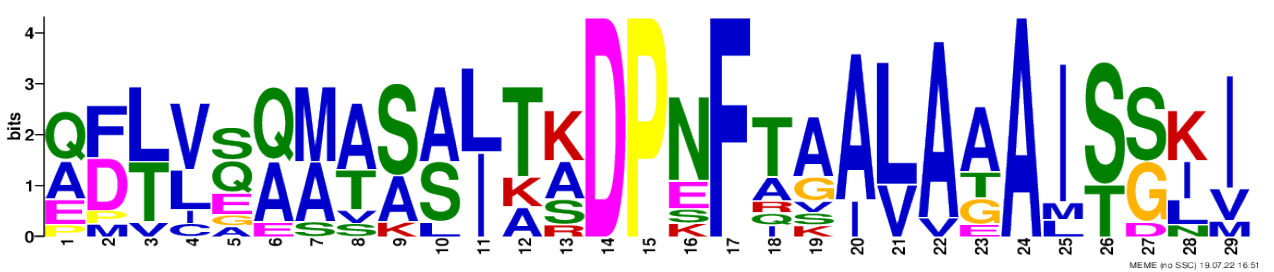

## Motif 8

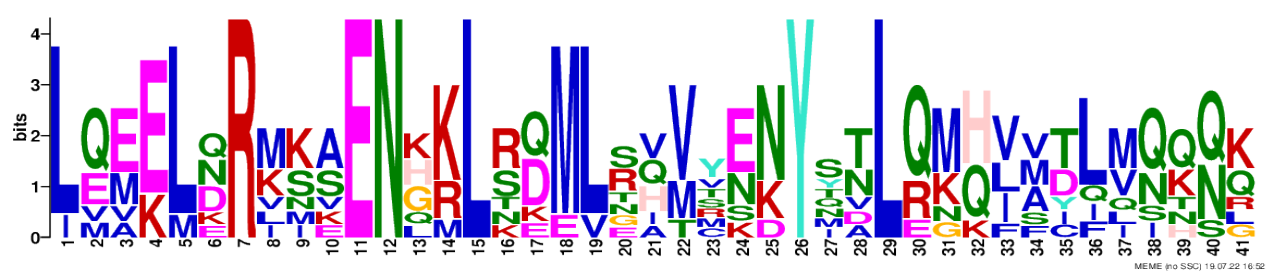

## Motif 9

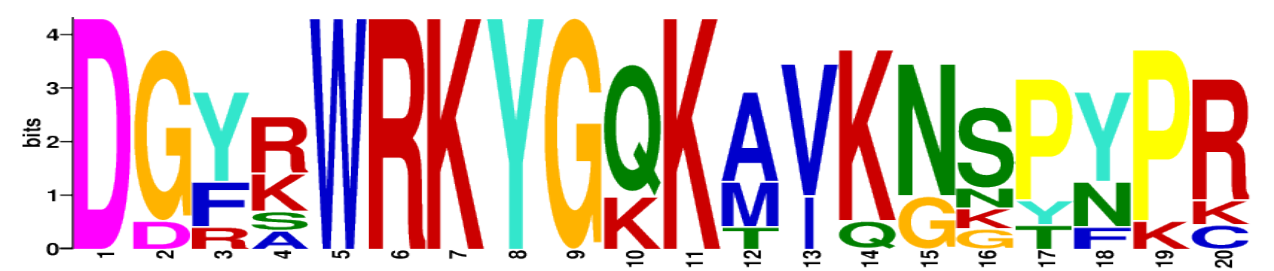

## Motif 10

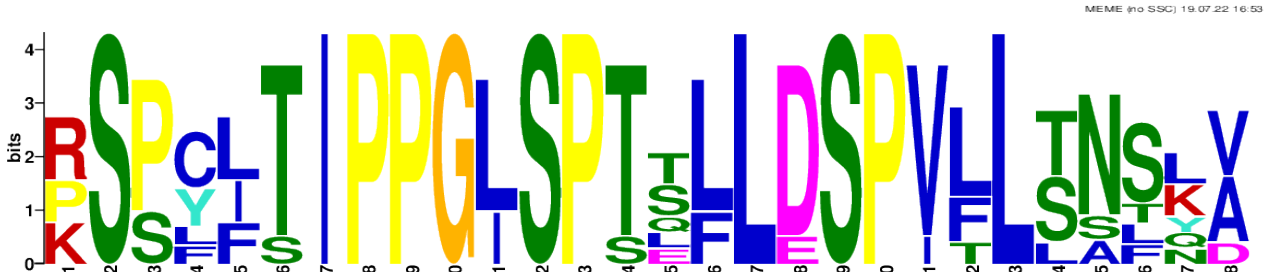

Figure S2 Ten types of conserved motifs in *Cucurbita pepo*.
