# Supplementary material for: Genome-Wide Identification of the WRKY Gene Family and Functional Characterization of CpWRKY5 in Cucurbita pepo
Source: Int J Mol Sci. 2024 Apr 10;25(8):4177. doi: 10.3390/ijms25084177 (PMC11049939; doi:10.3390/ijms25084177)
Supplement: Supplementary file 1 [file ijms-25-04177-s001.zip]

Archive with 11 entries (11 files):
- Figure S1.pdf
- Figure S2.pdf
- Figure S3.pdf
- Figure S4.pdf
- Table S1. Features of WRKY genes identified in C. pepo.xlsx
- Table S2.txt
- Table S3. Synteny analysis of WRKY gene in Cucurbita pepo.xlsx
- Table S4. Synteny analysis of WRKY genes in Cucurbita pepo, Cucumis sativus and Cucumis melo.xlsx
- Table S5. Gene expression of Act and CpWRKYs in different treatments of C. pepo.xlsx
- Table S6. Gene expression of lignin synthetic genes and lignin content in different tobacco lines.xlsx
- Table S7. The primers used for genes expression analysis.xlsx
