# Supplementary material for: Genome-Wide Identification of the WRKY Gene Family and Functional Characterization of CpWRKY5 in Cucurbita pepo
Source: Int J Mol Sci. 2024 Apr 10;25(8):4177. doi: 10.3390/ijms25084177 (PMC11049939; doi:10.3390/ijms25084177)
Supplement: Supplementary file 1 [file ijms-25-04177-s001.zip › Table S1. Features of WRKY genes identified in C. pepo.xlsx]

## Sheet: Sheet1
Table S1. Features of WRKY genes identified in C. pepo
Gene name	Gene ID	ORF	MW	pI	Chr	Begin	End	strand	Subcellular Localization
		(AA)	(Da)
CpWRKY1	Cp4.1LG01g00130	183	20305.8	8.14	Chr1	3759854	3760802	-	Nucl
CpWRKY2	Cp4.1LG01g00250	215	23774	4.46	Chr1	3762476	3763465	-	Chlo
CpWRKY3	Cp4.1LG01g00360	356	39712.5	6.44	Chr1	3617204	3620186	+	Nucl
CpWRKY4	Cp4.1LG01g01970	477	53469	6.33	Chr1	2637444	2640012	-	Nucl
CpWRKY5	Cp4.1LG01g07170	261	29103.8	5.66	Chr1	5699292	5700637	+	Nucl
CpWRKY6	Cp4.1LG01g12160	486	53294	8.23	Chr1	8901402	8904724	-	Nucl
CpWRKY7	Cp4.1LG02g04820	346	37317.8	10.1	Chr2	2230984	2233174	+	Nucl
CpWRKY8	Cp4.1LG02g05340	325	36377.7	7.95	Chr2	1739851	1742754	-	Nucl
CpWRKY9	Cp4.1LG02g06760	384	41325.9	10.13	Chr2	1008099	1011234	-	Nucl
CpWRKY10	Cp4.1LG02g11140	550	60050.3	7.45	Chr2	10375710	10378366	+	Nucl
CpWRKY11	Cp4.1LG02g15110	303	33552.5	8.94	Chr2	13545236	13547323	-	Nucl
CpWRKY12	Cp4.1LG02g16210	237	27002.3	4.3	Chr2	12993881	12995293	+	Nucl
CpWRKY13	Cp4.1LG03g02050	462	51069	9.41	Chr3	753145	757168	-	Nucl
CpWRKY14	Cp4.1LG03g03290	475	51765.6	7.83	Chr3	148105	155971	-	Nucl
CpWRKY15	Cp4.1LG03g06840	172	19280.5	9.54	Chr3	3760638	3762359	-	Nucl
CpWRKY16	Cp4.1LG03g08890	214	23789.8	8.78	Chr3	5849672	5850891	-	Nucl
CpWRKY17	Cp4.1LG03g11900	302	33094.7	8.6	Chr3	10730902	10732156	-	Nucl
CpWRKY18	Cp4.1LG03g12920	167	18791.4	10.12	Chr3	9956281	9957935	+	Chlo
CpWRKY19	Cp4.1LG03g15600	214	24392.9	8.81	Chr3	13752289	13754229	+	Nucl
CpWRKY20	Cp4.1LG04g02450	241	27429.6	9.89	Chr4	7845052	7845905	+	Nucl
CpWRKY21	Cp4.1LG04g02780	274	29636.4	5.86	Chr4	7578058	7580385	+	Nucl
CpWRKY22	Cp4.1LG04g03970	425	47125.7	6.47	Chr4	6812437	6817790	-	Nucl
CpWRKY23	Cp4.1LG04g13250	284	30648.4	9.94	Chr4	10951905	10953532	+	Nucl
CpWRKY24	Cp4.1LG05g01350	284	31722.9	10.08	Chr5	230004	231599	+	Nucl
CpWRKY25	Cp4.1LG05g06330	329	36025.8	7.09	Chr5	3893194	3894413	-	Nucl
CpWRKY26	Cp4.1LG05g09980	575	63435.1	8.86	Chr5	6508052	6517477	-	Nucl
CpWRKY27	Cp4.1LG05g11790	278	30096.5	9.68	Chr5	8145093	8147260	+	Nucl
CpWRKY28	Cp4.1LG06g01700	384	41749.7	10.11	Chr6	949236	953293	-	Nucl
CpWRKY29	Cp4.1LG06g03010	303	34393.6	6.52	Chr6	1636222	1638151	-	Nucl
CpWRKY30	Cp4.1LG06g04620	341	36703.4	10.1	Chr6	2231470	2233236	-	Nucl
CpWRKY31	Cp4.1LG07g00870	184	20864.7	10.36	Chr7	389969	391304	-	Chlo
CpWRKY32	Cp4.1LG07g03150	310	34143.3	8.9	Chr7	2088381	2090626	+	Nucl
CpWRKY33	Cp4.1LG07g05980	145	16777.4	5.04	Chr7	3774004	3777850	-	Nucl
CpWRKY34	Cp4.1LG08g00890	332	37426	4.42	Chr8	3841380	3843064	-	Nucl
CpWRKY35	Cp4.1LG08g01440	333	36551	5.24	Chr8	3446773	3448535	-	Nucl
CpWRKY36	Cp4.1LG08g05270	323	35503.2	6.94	Chr8	939405	941099	-	Nucl
CpWRKY37	Cp4.1LG08g08130	740	80399.9	6.35	Chr8	6472290	6476034	-	Nucl
CpWRKY38	Cp4.1LG08g08540	578	63628	6.8	Chr8	6729186	6736106	-	Nucl
CpWRKY39	Cp4.1LG09g02180	450	48843.8	7.95	Chr9	1176967	1181374	-	Nucl
CpWRKY40	Cp4.1LG09g07110	387	43178.3	6.51	Chr9	6350681	6352480	-	Nucl
CpWRKY41	Cp4.1LG10g02340	314	33963	10.01	Chr10	2618206	2619978	-	Nucl
CpWRKY42	Cp4.1LG10g03040	219	25020.1	9.01	Chr10	2206612	2207614	-	Nucl
CpWRKY43	Cp4.1LG10g05720	266	29477.4	5.45	Chr10	689343	691269	-	Nucl
CpWRKY44	Cp4.1LG10g08390	296	33055.6	6.79	Chr10	5028958	5030429	-	Nucl
CpWRKY45	Cp4.1LG10g09790	613	65886.2	6.8	Chr10	4413950	4416635	+	Nucl
CpWRKY46	Cp4.1LG11g03520	134	15624.3	4.71	Chr11	1979817	1981052	+	Nucl
CpWRKY47	Cp4.1LG11g03940	314	34783.2	7.14	Chr11	2106104	2109736	-	Nucl
CpWRKY48	Cp4.1LG12g03320	273	30372.8	5.98	Chr12	2190645	2192926	+	Nucl
CpWRKY49	Cp4.1LG12g04760	282	31761.5	6.73	Chr12	4526946	4528214	-	Nucl
CpWRKY50	Cp4.1LG12g06240	293	33627.4	7.94	Chr12	7677612	7678699	-	Nucl
CpWRKY51	Cp4.1LG13g02760	342	37978.5	4.88	Chr13	2202479	2203743	+	Nucl
CpWRKY52	Cp4.1LG14g02220	343	37483.5	5.2	Chr14	3117647	3119283	-	Nucl
CpWRKY53	Cp4.1LG14g02520	353	39455.3	6.39	Chr14	2948856	2950335	+	Nucl
CpWRKY54	Cp4.1LG14g06650	380	41781.6	6.45	Chr14	311927	313222	+	Nucl
CpWRKY55	Cp4.1LG14g07630	533	58282.2	6.6	Chr14	6036846	6044372	+	Nucl
CpWRKY56	Cp4.1LG14g08130	700	76414.9	6.51	Chr14	6556851	6560228	+	Nucl
CpWRKY57	Cp4.1LG15g00430	310	34508.2	10.21	Chr15	343905	346634	+	Nucl
CpWRKY58	Cp4.1LG15g07340	521	55638.9	8.29	Chr15	7706728	7708877	+	Nucl
CpWRKY59	Cp4.1LG15g08170	295	31757.6	5.41	Chr15	8165599	8169020	-	Nucl
CpWRKY60	Cp4.1LG15g08740	291	32846.2	8.21	Chr15	8508582	8510036	+	Nucl
CpWRKY61	Cp4.1LG16g00060	220	25648.6	9.59	Chr16	726252	728718	+	Nucl
CpWRKY62	Cp4.1LG16g01500	282	30474.9	9.7	Chr16	3550772	3552888	+	Nucl
CpWRKY63	Cp4.1LG16g07300	249	27604.3	6.04	Chr16	7390912	7392379	-	Nucl
CpWRKY64	Cp4.1LG17g00040	171	19003.2	8.6	Chr17	448267	448782	-	Nucl
CpWRKY65	Cp4.1LG17g06230	339	37481.1	9.78	Chr17	6822550	6824535	+	Nucl
CpWRKY66	Cp4.1LG17g07650	149	17541.9	10.28	Chr17	5848872	5849754	-	Nucl
CpWRKY67	Cp4.1LG17g10220	339	37854.1	6.43	Chr17	7738539	7740520	-	Chlo
CpWRKY68	Cp4.1LG18g02530	774	85200.7	5.29	Chr18	4198269	4205496	+	Nucl
CpWRKY69	Cp4.1LG18g05560	506	55686.3	6.46	Chr18	6177793	6182192	+	Nucl
CpWRKY70	Cp4.1LG18g06480	109	12330.1	10.5	Chr18	6631860	6633032	+	Cyto
CpWRKY71	Cp4.1LG19g07870	621	67050.6	7.06	Chr19	6777505	6780568	+	Nucl
CpWRKY72	Cp4.1LG19g11130	202	22295.2	10.11	Chr19	5145825	5146696	-	Chlo
CpWRKY73	Cp4.1LG19g11800	179	20473.7	8.58	Chr19	4780138	4781534	+	Cyto
CpWRKY74	Cp4.1LG20g01990	492	52621.5	8.63	Chr20	1150014	1152188	-	Nucl
CpWRKY75	Cp4.1LG20g04680	274	29701.6	5.19	Chr20	2758523	2759590	+	Nucl
CpWRKY76	Cp4.1LG00g01540	498	54364.4	5.37	UN	3843328	3844978	+	Nucl
