# Supplementary material for: Genome-Wide Identification of the WRKY Gene Family and Functional Characterization of CpWRKY5 in Cucurbita pepo
Source: Int J Mol Sci. 2024 Apr 10;25(8):4177. doi: 10.3390/ijms25084177 (PMC11049939; doi:10.3390/ijms25084177)
Supplement: Supplementary file 1 [file ijms-25-04177-s001.zip › Table S2.txt]

********************************************************************************
MEME - Motif discovery tool
********************************************************************************
MEME version 5.1.0 (Release date: Fri Oct 11 15:53:28 2019 -0700)

For further information on how to interpret please access http://meme-suite.org.
To get a copy of the MEME software please access http://meme-suite.org.

********************************************************************************


********************************************************************************
REFERENCE
********************************************************************************
If you use this program in your research, please cite:

Timothy L. Bailey and Charles Elkan,
"Fitting a mixture model by expectation maximization to discover
motifs in biopolymers", Proceedings of the Second International
Conference on Intelligent Systems for Molecular Biology, pp. 28-36,
AAAI Press, Menlo Park, California, 1994.
********************************************************************************


********************************************************************************
TRAINING SET
********************************************************************************
PRIMARY SEQUENCES= ../WRKY_pep_confirmed.fa
CONTROL SEQUENCES= --none--
ALPHABET= ACDEFGHIKLMNPQRSTVWY
Sequence name            Weight Length  Sequence name            Weight Length  
-------------            ------ ------  -------------            ------ ------  
Cp4.1LG00g01540.1        1.0000    498  Cp4.1LG01g01970.1        1.0000    477  
Cp4.1LG01g00360.1        1.0000    356  Cp4.1LG01g00130.1        1.0000    183  
Cp4.1LG01g00250.1        1.0000    215  Cp4.1LG01g07170.1        1.0000    261  
Cp4.1LG01g12160.1        1.0000    486  Cp4.1LG02g06760.1        1.0000    384  
Cp4.1LG02g05340.1        1.0000    325  Cp4.1LG02g04820.1        1.0000    346  
Cp4.1LG02g11140.1        1.0000    550  Cp4.1LG02g16210.1        1.0000    237  
Cp4.1LG02g15110.1        1.0000    303  Cp4.1LG03g03290.1        1.0000    475  
Cp4.1LG03g02050.1        1.0000    462  Cp4.1LG03g06840.1        1.0000    172  
Cp4.1LG03g05140.1        1.0000    200  Cp4.1LG03g08890.1        1.0000    214  
Cp4.1LG03g12920.1        1.0000    167  Cp4.1LG03g11900.1        1.0000    302  
Cp4.1LG03g15600.1        1.0000    214  Cp4.1LG04g03970.1        1.0000    425  
Cp4.1LG04g02780.1        1.0000    274  Cp4.1LG04g02450.1        1.0000    241  
Cp4.1LG04g13250.1        1.0000    284  Cp4.1LG05g01350.1        1.0000    284  
Cp4.1LG05g06330.1        1.0000    329  Cp4.1LG05g09980.1        1.0000    575  
Cp4.1LG05g11790.1        1.0000    278  Cp4.1LG06g01700.1        1.0000    384  
Cp4.1LG06g03010.1        1.0000    303  Cp4.1LG06g04620.1        1.0000    341  
Cp4.1LG07g00870.1        1.0000    184  Cp4.1LG07g03150.1        1.0000    310  
Cp4.1LG07g05980.1        1.0000    145  Cp4.1LG08g05270.1        1.0000    323  
Cp4.1LG08g01440.1        1.0000    333  Cp4.1LG08g00890.1        1.0000    332  
Cp4.1LG08g08130.1        1.0000    740  Cp4.1LG08g08540.1        1.0000    578  
Cp4.1LG09g02180.1        1.0000    450  Cp4.1LG09g07110.1        1.0000    387  
Cp4.1LG10g05720.1        1.0000    266  Cp4.1LG10g03040.1        1.0000    219  
Cp4.1LG10g02340.1        1.0000    314  Cp4.1LG10g09790.1        1.0000    613  
Cp4.1LG10g08390.1        1.0000    296  Cp4.1LG11g03520.1        1.0000    134  
Cp4.1LG11g03940.1        1.0000    314  Cp4.1LG12g03320.1        1.0000    273  
Cp4.1LG12g04760.1        1.0000    282  Cp4.1LG12g06240.1        1.0000    293  
Cp4.1LG13g02760.1        1.0000    342  Cp4.1LG14g06650.1        1.0000    380  
Cp4.1LG14g02520.1        1.0000    353  Cp4.1LG14g02220.1        1.0000    343  
Cp4.1LG14g07630.1        1.0000    533  Cp4.1LG14g08130.1        1.0000    700  
Cp4.1LG15g00430.1        1.0000    310  Cp4.1LG15g07340.1        1.0000    521  
Cp4.1LG15g08170.1        1.0000    295  Cp4.1LG15g08740.1        1.0000    291  
Cp4.1LG16g00060.1        1.0000    220  Cp4.1LG16g01500.1        1.0000    282  
Cp4.1LG16g07300.1        1.0000    249  Cp4.1LG17g00040.1        1.0000    171  
Cp4.1LG17g07650.1        1.0000    149  Cp4.1LG17g06230.1        1.0000    339  
Cp4.1LG17g10220.1        1.0000    339  Cp4.1LG18g02530.1        1.0000    774  
Cp4.1LG18g05560.1        1.0000    506  Cp4.1LG18g06480.1        1.0000    109  
Cp4.1LG19g11800.1        1.0000    179  Cp4.1LG19g11130.1        1.0000    202  
Cp4.1LG19g07870.1        1.0000    621  Cp4.1LG20g01990.1        1.0000    492  
Cp4.1LG20g04680.1        1.0000    274  
********************************************************************************

********************************************************************************
COMMAND LINE SUMMARY
********************************************************************************
This information can also be useful in the event you wish to report a
problem with the MEME software.

command: meme ../WRKY_pep_confirmed.fa -protein -oc ./ -nostatus -time 18000 -maxsize 6000000 -mod anr -nmotifs 10 -minw 6 -maxw 100 

model:  mod=           anr    nmotifs=        10    evt=           inf
objective function:           em=       E-value of product of p-values
                              starts=   E-value of product of p-values
width:  minw=            6    maxw=          100
nsites: minsites=        2    maxsites=      385    wnsites=       0.8
theta:  spmap=         pam    spfuzz=        120
em:     prior=       megap    b=          131525    maxiter=        50
        distance=    1e-05
trim:   wg=             11    ws=              1    endgaps=       yes
data:   n=           26305    N=              77
sample: seed=            0    hsfrac=          0
        searchsize=  26305    norand=         no    csites=       1000
Dirichlet mixture priors file: prior30.plib
Letter frequencies in dataset:
A 0.0635 C 0.0177 D 0.0561 E 0.0576 F 0.0346 G 0.0616 H 0.0309 I 0.034 K 0.0614 
L 0.0643 M 0.0218 N 0.0524 P 0.0761 Q 0.0455 R 0.053 S 0.122 T 0.0581 V 0.0534 
W 0.0076 Y 0.0284 
Background letter frequencies (from file dataset with add-one prior applied):
A 0.0635 C 0.0177 D 0.0561 E 0.0576 F 0.0346 G 0.0616 H 0.0309 I 0.034 K 0.0614 
L 0.0643 M 0.0218 N 0.0524 P 0.0761 Q 0.0455 R 0.053 S 0.122 T 0.0581 V 0.0534 
W 0.00764 Y 0.0284 
Background model order: 0
********************************************************************************


********************************************************************************
MOTIF DGYRWRKYGQKPVKGSPYPRSYYRCT MEME-1	width =  26  sites =  82  llr = 5285  E-value = 1.5e-1802
********************************************************************************
--------------------------------------------------------------------------------
	Motif DGYRWRKYGQKPVKGSPYPRSYYRCT MEME-1 Description
--------------------------------------------------------------------------------
Simplified        A  :::1:::::::21:::::::1:::::
pos.-specific     C  ::1::::::::::::::1::::::a:
probability       D  a1:::::::::1::1:::::::::::
matrix            E  :1::::::::::::::1:::::::::
                  F  ::1::::::::::::::2::::1:::
                  G  :7::::::a:::::7:::::2:::::
                  H  :::::::::::::::::1::::::::
                  I  ::::::::::::4:::::::::::::
                  K  :::1::a:::a::9::1::::::5::
                  L  :::::::::::::1::::::::::::
                  M  ::::::::::::::::::::::::::
                  N  :::2::::::::::23:2::::::::
                  P  :::::::::::3::::7:a:::::::
                  Q  :::1:::::a:1::::::::::::::
                  R  :::3:a:::::::1:::::a:::5::
                  S  :1:2:::::::::::6::::6::::4
                  T  ::::::::::::1::::::::::::6
                  V  :::::::::::25:::::::::::::
                  W  ::1:a:::::::::::::::::::::
                  Y  ::7::::a:::::::::4:::a9:::

         bits    7.0     *                     
                 6.3     *                     
                 5.6     *                   * 
                 4.9     *  *             ** * 
Relative         4.2 * * *******        * ** * 
Entropy          3.5 * * *******  *    ** ** * 
(93.0 bits)      2.8 *** ******* ***  *** *****
                 2.1 *** ******* **************
                 1.4 **************************
                 0.7 **************************
                 0.0 --------------------------

Multilevel           DGYRWRKYGQKPVKGSPYPRSYYRCT
consensus               S        I NN    G  K S
sequence                                       
                                               
                                               
--------------------------------------------------------------------------------

--------------------------------------------------------------------------------
	Motif DGYRWRKYGQKPVKGSPYPRSYYRCT MEME-1 sites sorted by position p-value
--------------------------------------------------------------------------------
Sequence name             Start   P-value                       Site         
-------------             ----- ---------            --------------------------
Cp4.1LG01g12160.1           380  8.09e-33 QTTSEVDLLD DGYRWRKYGQKIVKGNPYPRSYYKCT TSGCNVRKHV
Cp4.1LG17g07650.1            39  1.49e-32 MTKSKVDHLE DGYRWRKYGQKAVKNSPYPRSYYRCT SVACHVKKRV
Cp4.1LG15g08740.1           157  1.49e-32 LTKSEIDHLE DGYRWRKYGQKAVKNSPYPRSYYRCT SQKCLVKKRV
Cp4.1LG12g06240.1           132  1.49e-32 MTKSEVDHLE DGYRWRKYGQKAVKNSPYPRSYYRCT SVACNVKKRV
Cp4.1LG12g03320.1           133  1.49e-32 MTKSEVDHLD DGYRWRKYGQKAVKNSPYPRSYYRCT TAGCGVKKRV
Cp4.1LG08g05270.1           165  1.49e-32 MTKSDIDHLD DGYRWRKYGQKAVKNSPYPRSYYRCT TSQCGVKKRV
Cp4.1LG04g02450.1           107  1.49e-32 LTKSEIDQLE DGYRWRKYGQKAVKNSPYPRSYYRCT SQKCVVKKRV
Cp4.1LG03g11900.1           146  1.49e-32 MTKSDIDHLD DGYRWRKYGQKAVKNSPYPRSYYRCT TVGCGVKKRV
Cp4.1LG18g02530.1           485  2.46e-32 QIETDVDILE DGYRWRKYGQKVVKGNPNPRSYYKCT SAGCAVRKHV
Cp4.1LG14g08130.1           495  2.46e-32 QTTSEVDILD DGYRWRKYGQKVVKGNPNPRSYYKCT NPGCTVRKHV
Cp4.1LG08g08130.1           538  2.46e-32 QTTSEVDILD DGYRWRKYGQKVVKGNPNPRSYYKCT NPGCTVRKHV
Cp4.1LG03g03290.1           319  2.46e-32 QTTSEIDILP DGYRWRKYGQKVVKGNPNPRSYYKCT SLGCPVRKHI
Cp4.1LG02g11140.1           375  2.46e-32 QTTSDIDILD DGYRWRKYGQKVVKGNPNPRSYYKCT NPGCPVRKHV
Cp4.1LG00g01540.1           291  2.46e-32 QIETEFDILE DGYRWRKYGQKVVKGNPNPRSYYKCT SAGCSVRKHV
Cp4.1LG18g02530.1           260  1.05e-31 IPMGMLRTSE DGYNWRKYGQKQVKGSEYPRSYYKCT HPNCQVKKKV
Cp4.1LG14g08130.1           304  1.05e-31 AGGGCGAPSE DGYNWRKYGQKQVKGSEYPRSYYKCT HPNCQVKKKV
Cp4.1LG08g08130.1           323  1.05e-31 AGGGSGAPSE DGYNWRKYGQKQVKGSEYPRSYYKCT HPNCQVKKKV
Cp4.1LG07g00870.1            45  1.05e-31 MTKSEVDHLE DGYRWRKYGQKAVKNSPFPRSYYRCT NSKCTVKKRV
Cp4.1LG00g01540.1            75  1.05e-31 VPVGMLKTSE DGYNWRKYGQKQVKGSEYPRSYYKCT HPNCIVKKKV
Cp4.1LG16g07300.1           132  1.56e-31 LTKSEIDNLE DGYRWRKYGQKAVKNSPFPRSYYKCT SQNCSVKKRV
Cp4.1LG18g05560.1           369  2.60e-31 HAAGDVGISG DGYRWRKYGQKMVKGSPHPRNYYRCT SAGCPVRKHI
Cp4.1LG03g02050.1           197  2.60e-31 SQVSCAQPSY DGYNWRKYGQKQVKGSKYPRSYYKCT HPSCPVKKKV
Cp4.1LG09g02180.1           201  4.92e-31 SSCNVDRPAD DGYNWRKYGQKQVKGSEFPRSYYKCT YPNCPVKKKV
Cp4.1LG03g03290.1           170  9.24e-31 YSREQKKSEN DGYNWRKYGQKQVKGSENPRSYYKCT FPNCPTKKKV
Cp4.1LG02g11140.1           205  9.24e-31 QSQTVNRRSD DGYNWRKYGQKQVKGSENPRSYYKCT FPNCPTKKKV
Cp4.1LG08g08540.1           399  1.07e-30 QTLSEVDILD DGYRWRKYGQKVVRGNPNPRSYYKCT NVGCPVRKHV
Cp4.1LG04g03970.1           284  1.07e-30 QTPSEVDIVN DGYRWRKYGQKLVKGNPNPRSYYRCS SPGCPVKKHV
Cp4.1LG03g06840.1            94  1.43e-30 QTRSQVDILD DGYRWRKYGQKAVKNNKFPRSYYRCT HQGCNVKKQV
Cp4.1LG11g03940.1           156  1.89e-30 MTKSEVDHLE DGYRWRKYGQKAVKYSPFPRSYYRCT NSKCTVKKRV
Cp4.1LG14g07630.1           207  2.18e-30 SPVVSDRISD DGYNWRKYGQKHVKGSEFPRSYYKCT HPNCEVKKLF
Cp4.1LG08g08540.1           223  2.18e-30 IQVVSDRLSD DGYNWRKYGQKHVKGSEFPRSYYKCT HPNCEVKKLF
Cp4.1LG10g05720.1           120  2.51e-30 MTKSEVDHLE DGYRWRKYGQKAVKNSAYPRSYYRCT TQKCGVKKRV
Cp4.1LG16g01500.1           211  2.89e-30 ISSKNADIPP DDYSWRKYGQKPIKGSPYPRGYYKCS SLRGCPARKH
Cp4.1LG05g11790.1           207  2.89e-30 ISSKNADIPP DDYSWRKYGQKPIKGSPYPRGYYKCS SLRGCPARKH
Cp4.1LG18g06480.1            36  3.33e-30 ISSKIADIPP DEYSWRKYGQKPIKGSPYPRGYYRCS TVKGCPARKK
Cp4.1LG04g13250.1           207  3.33e-30 ISSKIAEIPS DEYSWRKYGQKPIKGSPYPRGYYRCS AVKGCPARKK
Cp4.1LG05g09980.1           314  4.36e-30 QSQPKNRTSD DGYNWRKYGQKLVKGSENPRSYYKCT HPTCPVRKQV
Cp4.1LG02g04820.1           270  4.36e-30 ISSKIADIPP DEYSWRKYGQKPIKGSPYPRGYYKCS SMRGCPARKH
Cp4.1LG03g12920.1            90  7.33e-30 QTRSQVDILD DGYKWRKYGQKAVKNNKFPRSYYRCT HQGCKVKKQV
Cp4.1LG17g06230.1           273  9.46e-30 ISNKLADIPP DDYSWRKYGQKPIKGSPHPRGYYKCS SMRGCPARKH
Cp4.1LG15g00430.1           244  9.46e-30 ISNKLADIPS DDYSWRKYGQKPIKGSPHPRGYYKCS SMRGCPARKH
Cp4.1LG10g02340.1           243  9.46e-30 ISLKMADIPP DDYSWRKYGQKPIKGSPHPRGYYKCS SVRGCPARKH
Cp4.1LG06g01700.1           313  9.46e-30 VSSKLADIPP DDYSWRKYGQKPIKGSPHPRGYYKCS SLRGCPARKH
Cp4.1LG02g06760.1           313  9.46e-30 VSAKLADIPP DDYSWRKYGQKPIKGSPHPRGYYKCS SLRGCPARKH
Cp4.1LG03g15600.1           142  1.22e-29 QTRSDVDVLD DGYKWRKYGQKVVKNSLHPRSYYRCT HNNCRVKKRV
Cp4.1LG15g08170.1            76  1.38e-29 KSKGEAYPPS DSWAWRKYGQKPIKGSPYPRGYYRCS SSKGCPARKQ
Cp4.1LG05g01350.1           213  1.38e-29 ISNKLADIPS DEYSWRKYGQKPIKGSPHPRGYYKCS SMRGCPARKH
Cp4.1LG04g02780.1            67  1.38e-29 KSKGEAYPPS DSWAWRKYGQKPIKGSPYPRGYYRCS SSKGCPARKQ
Cp4.1LG02g16210.1            68  1.56e-29 GKMKNEGPPP DFWSWRKYGQKPIKGSPYPRGYYRCS TTKGCSAKKQ
Cp4.1LG01g12160.1           205  1.56e-29 SLCTVGRPAD DGYNWRKYGQKQVKGGEFPRSYYKCT HPNCPVRKKV
Cp4.1LG08g01440.1           160  1.98e-29 CQVPAEALSS DIWAWRKYGQKPIKGSPYPRGYYRCS SSKGCMARKQ
Cp4.1LG20g04680.1            74  2.22e-29 NSSGSTTPPS DSWAWRKYGQKPIKGSPYPRAYYRCS SSKGCPARKQ
Cp4.1LG13g02760.1           179  2.50e-29 CHVTADNLST DMWAWRKYGQKPIKGSPYPRNYYRCS SSKGCGARKQ
Cp4.1LG05g06330.1           170  2.50e-29 CHVTADNLST DMWAWRKYGQKPIKGSPYPRNYYRCS SSKGCGARKQ
Cp4.1LG19g07870.1           348  2.81e-29 RARSEAPMIS DGCQWRKYGQKMAKGNPCPRAYYRCT MAVGCPVRKQ
Cp4.1LG15g07340.1           281  2.81e-29 RARSEAPMIT DGCQWRKYGQKMAKGNPCPRAYYRCT MAAGCPVRKQ
Cp4.1LG10g09790.1           347  2.81e-29 RARSEAPMIS DGCQWRKYGQKMAKGNPCPRAYYRCT MAVGCPVRKQ
Cp4.1LG01g00130.1           106  3.16e-29 QTRSAEDVLD DGYRWRKYGQKAVKHSTHPRSYYRCT HHTCNVKKQI
Cp4.1LG14g02220.1           223  3.55e-29 KEVKAEGVCS DSWGWRKYGQKPIKGSPYPRSYYRCS SSKGCSARKQ
Cp4.1LG09g07110.1           191  3.55e-29 RSSSGEVVPS DLWAWRKYGQKPIKGSPYPRGYYRCS SSKGCSARKQ
Cp4.1LG01g00250.1            82  3.55e-29 ISDLLGDVCS DSWGWRKYGQKPIKGSPYPRSYYRCS SSKGCSARKQ
Cp4.1LG20g01990.1           152  5.02e-29 TNPPKRARMN DGCQWRKYGQKIAKGNPCPRAYYRCT GSPTCPVRKQ
Cp4.1LG10g08390.1           130  5.02e-29 KSCDGNSLAD DGYKWRKYGQKSIKNSPNPRSYYRCS NPRCSAKKQV
Cp4.1LG01g01970.1           239  5.02e-29 RARCEAATMN DGCQWRKYGQKIAKGNPCPRAYYRCT VAPGCPVRKQ
Cp4.1LG06g04620.1           265  9.80e-29 ISSKIADIPT DEFSWRKYGQKPIKGSPYPRAYYKCS TMRGCPARKH
Cp4.1LG10g03040.1           144  1.09e-28 KTMTDVDVLD DGYKWRKYGQKVVKNTLHPRSYYRCT EENCKVKKRV
Cp4.1LG16g00060.1           145  1.87e-28 KTLSDVDVLD DGYKWRKYGQKVVKNTQHPRSYYRCT QDHCRVKKRV
Cp4.1LG01g00360.1           133  2.57e-28 SETGFEGPHE DGYSWRKYGQKDILGATYPRSYYRCT FRNTQNCWAV
Cp4.1LG14g02520.1           132  6.46e-28 SETGFEGPHE DGYSWRKYGQKDILGATFPRSYYRCT FRNTQNCWAI
Cp4.1LG04g03970.1           111  6.46e-28 TSTIREKVSE DGYNWRKYGQKLVKGNVFVRSYYRCT HPTCMVKKQL
Cp4.1LG07g03150.1           149  7.89e-28 PISDSSLAVK DGYQWRKYGQKVTKDNPSPRAYYKCS FAPSCPVKKK
Cp4.1LG03g02050.1           392  1.06e-27 RGSTDIEISG KGIRWRKYGQKVVKGNLYPRSYYRCT GLKCKARKYV
Cp4.1LG03g08890.1            74  5.44e-27 LTEMLSVVVK DGYQWRKYGQKVTRDNPCPRAYFKCS FAPTCPVKKK
Cp4.1LG02g15110.1           161  5.44e-27 GASDSNLVVK DGYQWRKYGQKVTRDNPCPRAYFKCS FAPTCPVKKK
Cp4.1LG08g00890.1           115  1.14e-26 SGSAAESPLN DGYSWRKYGQKDIHGANFPRCYYRCT HRNVRGCLAT
Cp4.1LG17g10220.1           162  1.96e-26 SVSAIGALPD DGFSWRKYGQKDILGSKFPRGYFRCS HRFAQGCSAT
Cp4.1LG12g04760.1            94  1.96e-26 SASAVEGPLH DGFSWRKYGQKDILGSKFPRGYFRCS HRFTLGCKAT
Cp4.1LG06g03010.1           146  4.37e-26 DASDPSLVVK DGYQWRKYGQKVTRDNPSPRAYFKCS SAPNCPVKKK
Cp4.1LG02g05340.1           166  4.37e-26 DASDPSLVVK DGYQWRKYGQKVTRDNPSPRAYFKCS SAPNCPVKKK
Cp4.1LG19g11800.1            94  6.77e-26 RTKSELEILQ DGFKWRKYGKKSIKNNPNPRNYYKCS SSGCGVKKRV
Cp4.1LG14g06650.1           137  8.78e-26 PGMALEGSFD DGFCWRKYGQKGILGARHPRGYYRCT HRNLQGCLAT
Cp4.1LG18g05560.1           196  5.62e-25 SVPNVRTPAS DGYNWRKYGQKQVKSPKGSRSYYKCT YSECCAKKIE
--------------------------------------------------------------------------------

--------------------------------------------------------------------------------
	Motif DGYRWRKYGQKPVKGSPYPRSYYRCT MEME-1 block diagrams
--------------------------------------------------------------------------------
SEQUENCE NAME            POSITION P-VALUE  MOTIF DIAGRAM
-------------            ----------------  -------------
Cp4.1LG01g12160.1                 8.1e-33  204_[1]_149_[1]_81
Cp4.1LG17g07650.1                 1.5e-32  38_[1]_85
Cp4.1LG15g08740.1                 1.5e-32  156_[1]_109
Cp4.1LG12g06240.1                 1.5e-32  131_[1]_136
Cp4.1LG12g03320.1                 1.5e-32  132_[1]_115
Cp4.1LG08g05270.1                 1.5e-32  164_[1]_133
Cp4.1LG04g02450.1                 1.5e-32  106_[1]_109
Cp4.1LG03g11900.1                 1.5e-32  145_[1]_131
Cp4.1LG18g02530.1                 2.5e-32  259_[1]_199_[1]_264
Cp4.1LG14g08130.1                 2.5e-32  303_[1]_165_[1]_180
Cp4.1LG08g08130.1                 2.5e-32  322_[1]_189_[1]_177
Cp4.1LG03g03290.1                 2.5e-32  169_[1]_123_[1]_131
Cp4.1LG02g11140.1                 2.5e-32  204_[1]_144_[1]_150
Cp4.1LG00g01540.1                 2.5e-32  74_[1]_190_[1]_182
Cp4.1LG07g00870.1                 1.1e-31  44_[1]_114
Cp4.1LG16g07300.1                 1.6e-31  131_[1]_92
Cp4.1LG18g05560.1                 2.6e-31  195_[1]_147_[1]_112
Cp4.1LG03g02050.1                 2.6e-31  196_[1]_169_[1]_45
Cp4.1LG09g02180.1                 4.9e-31  200_[1]_224
Cp4.1LG08g08540.1                 1.1e-30  222_[1]_150_[1]_154
Cp4.1LG04g03970.1                 1.1e-30  110_[1]_147_[1]_116
Cp4.1LG03g06840.1                 1.4e-30  93_[1]_53
Cp4.1LG11g03940.1                 1.9e-30  155_[1]_133
Cp4.1LG14g07630.1                 2.2e-30  206_[1]_301
Cp4.1LG10g05720.1                 2.5e-30  119_[1]_121
Cp4.1LG16g01500.1                 2.9e-30  210_[1]_46
Cp4.1LG05g11790.1                 2.9e-30  206_[1]_46
Cp4.1LG18g06480.1                 3.3e-30  35_[1]_48
Cp4.1LG04g13250.1                 3.3e-30  206_[1]_52
Cp4.1LG05g09980.1                 4.4e-30  313_[1]_236
Cp4.1LG02g04820.1                 4.4e-30  269_[1]_51
Cp4.1LG03g12920.1                 7.3e-30  89_[1]_52
Cp4.1LG17g06230.1                 9.5e-30  272_[1]_41
Cp4.1LG15g00430.1                 9.5e-30  243_[1]_41
Cp4.1LG10g02340.1                 9.5e-30  242_[1]_46
Cp4.1LG06g01700.1                 9.5e-30  312_[1]_46
Cp4.1LG02g06760.1                 9.5e-30  312_[1]_46
Cp4.1LG03g15600.1                 1.2e-29  141_[1]_47
Cp4.1LG15g08170.1                 1.4e-29  75_[1]_194
Cp4.1LG05g01350.1                 1.4e-29  212_[1]_46
Cp4.1LG04g02780.1                 1.4e-29  66_[1]_182
Cp4.1LG02g16210.1                 1.6e-29  67_[1]_144
Cp4.1LG08g01440.1                   2e-29  159_[1]_148
Cp4.1LG20g04680.1                 2.2e-29  73_[1]_175
Cp4.1LG13g02760.1                 2.5e-29  178_[1]_138
Cp4.1LG05g06330.1                 2.5e-29  169_[1]_134
Cp4.1LG19g07870.1                 2.8e-29  347_[1]_248
Cp4.1LG15g07340.1                 2.8e-29  280_[1]_215
Cp4.1LG10g09790.1                 2.8e-29  346_[1]_241
Cp4.1LG01g00130.1                 3.2e-29  105_[1]_52
Cp4.1LG14g02220.1                 3.6e-29  222_[1]_95
Cp4.1LG09g07110.1                 3.6e-29  190_[1]_171
Cp4.1LG01g00250.1                 3.6e-29  81_[1]_108
Cp4.1LG20g01990.1                   5e-29  151_[1]_315
Cp4.1LG10g08390.1                   5e-29  129_[1]_141
Cp4.1LG01g01970.1                   5e-29  238_[1]_213
Cp4.1LG06g04620.1                 9.8e-29  264_[1]_51
Cp4.1LG10g03040.1                 1.1e-28  143_[1]_50
Cp4.1LG16g00060.1                 1.9e-28  144_[1]_50
Cp4.1LG01g00360.1                 2.6e-28  132_[1]_198
Cp4.1LG14g02520.1                 6.5e-28  131_[1]_196
Cp4.1LG07g03150.1                 7.9e-28  148_[1]_136
Cp4.1LG03g08890.1                 5.4e-27  73_[1]_115
Cp4.1LG02g15110.1                 5.4e-27  160_[1]_117
Cp4.1LG08g00890.1                 1.1e-26  114_[1]_192
Cp4.1LG17g10220.1                   2e-26  161_[1]_152
Cp4.1LG12g04760.1                   2e-26  93_[1]_163
Cp4.1LG06g03010.1                 4.4e-26  145_[1]_132
Cp4.1LG02g05340.1                 4.4e-26  165_[1]_134
Cp4.1LG19g11800.1                 6.8e-26  93_[1]_60
Cp4.1LG14g06650.1                 8.8e-26  136_[1]_218
--------------------------------------------------------------------------------

--------------------------------------------------------------------------------
	Motif DGYRWRKYGQKPVKGSPYPRSYYRCT MEME-1 in BLOCKS format
--------------------------------------------------------------------------------
BL   MOTIF DGYRWRKYGQKPVKGSPYPRSYYRCT width=26 seqs=82
Cp4.1LG01g12160.1        (  380) DGYRWRKYGQKIVKGNPYPRSYYKCT  1 
Cp4.1LG17g07650.1        (   39) DGYRWRKYGQKAVKNSPYPRSYYRCT  1 
Cp4.1LG15g08740.1        (  157) DGYRWRKYGQKAVKNSPYPRSYYRCT  1 
Cp4.1LG12g06240.1        (  132) DGYRWRKYGQKAVKNSPYPRSYYRCT  1 
Cp4.1LG12g03320.1        (  133) DGYRWRKYGQKAVKNSPYPRSYYRCT  1 
Cp4.1LG08g05270.1        (  165) DGYRWRKYGQKAVKNSPYPRSYYRCT  1 
Cp4.1LG04g02450.1        (  107) DGYRWRKYGQKAVKNSPYPRSYYRCT  1 
Cp4.1LG03g11900.1        (  146) DGYRWRKYGQKAVKNSPYPRSYYRCT  1 
Cp4.1LG18g02530.1        (  485) DGYRWRKYGQKVVKGNPNPRSYYKCT  1 
Cp4.1LG14g08130.1        (  495) DGYRWRKYGQKVVKGNPNPRSYYKCT  1 
Cp4.1LG08g08130.1        (  538) DGYRWRKYGQKVVKGNPNPRSYYKCT  1 
Cp4.1LG03g03290.1        (  319) DGYRWRKYGQKVVKGNPNPRSYYKCT  1 
Cp4.1LG02g11140.1        (  375) DGYRWRKYGQKVVKGNPNPRSYYKCT  1 
Cp4.1LG00g01540.1        (  291) DGYRWRKYGQKVVKGNPNPRSYYKCT  1 
Cp4.1LG18g02530.1        (  260) DGYNWRKYGQKQVKGSEYPRSYYKCT  1 
Cp4.1LG14g08130.1        (  304) DGYNWRKYGQKQVKGSEYPRSYYKCT  1 
Cp4.1LG08g08130.1        (  323) DGYNWRKYGQKQVKGSEYPRSYYKCT  1 
Cp4.1LG07g00870.1        (   45) DGYRWRKYGQKAVKNSPFPRSYYRCT  1 
Cp4.1LG00g01540.1        (   75) DGYNWRKYGQKQVKGSEYPRSYYKCT  1 
Cp4.1LG16g07300.1        (  132) DGYRWRKYGQKAVKNSPFPRSYYKCT  1 
Cp4.1LG18g05560.1        (  369) DGYRWRKYGQKMVKGSPHPRNYYRCT  1 
Cp4.1LG03g02050.1        (  197) DGYNWRKYGQKQVKGSKYPRSYYKCT  1 
Cp4.1LG09g02180.1        (  201) DGYNWRKYGQKQVKGSEFPRSYYKCT  1 
Cp4.1LG03g03290.1        (  170) DGYNWRKYGQKQVKGSENPRSYYKCT  1 
Cp4.1LG02g11140.1        (  205) DGYNWRKYGQKQVKGSENPRSYYKCT  1 
Cp4.1LG08g08540.1        (  399) DGYRWRKYGQKVVRGNPNPRSYYKCT  1 
Cp4.1LG04g03970.1        (  284) DGYRWRKYGQKLVKGNPNPRSYYRCS  1 
Cp4.1LG03g06840.1        (   94) DGYRWRKYGQKAVKNNKFPRSYYRCT  1 
Cp4.1LG11g03940.1        (  156) DGYRWRKYGQKAVKYSPFPRSYYRCT  1 
Cp4.1LG14g07630.1        (  207) DGYNWRKYGQKHVKGSEFPRSYYKCT  1 
Cp4.1LG08g08540.1        (  223) DGYNWRKYGQKHVKGSEFPRSYYKCT  1 
Cp4.1LG10g05720.1        (  120) DGYRWRKYGQKAVKNSAYPRSYYRCT  1 
Cp4.1LG16g01500.1        (  211) DDYSWRKYGQKPIKGSPYPRGYYKCS  1 
Cp4.1LG05g11790.1        (  207) DDYSWRKYGQKPIKGSPYPRGYYKCS  1 
Cp4.1LG18g06480.1        (   36) DEYSWRKYGQKPIKGSPYPRGYYRCS  1 
Cp4.1LG04g13250.1        (  207) DEYSWRKYGQKPIKGSPYPRGYYRCS  1 
Cp4.1LG05g09980.1        (  314) DGYNWRKYGQKLVKGSENPRSYYKCT  1 
Cp4.1LG02g04820.1        (  270) DEYSWRKYGQKPIKGSPYPRGYYKCS  1 
Cp4.1LG03g12920.1        (   90) DGYKWRKYGQKAVKNNKFPRSYYRCT  1 
Cp4.1LG17g06230.1        (  273) DDYSWRKYGQKPIKGSPHPRGYYKCS  1 
Cp4.1LG15g00430.1        (  244) DDYSWRKYGQKPIKGSPHPRGYYKCS  1 
Cp4.1LG10g02340.1        (  243) DDYSWRKYGQKPIKGSPHPRGYYKCS  1 
Cp4.1LG06g01700.1        (  313) DDYSWRKYGQKPIKGSPHPRGYYKCS  1 
Cp4.1LG02g06760.1        (  313) DDYSWRKYGQKPIKGSPHPRGYYKCS  1 
Cp4.1LG03g15600.1        (  142) DGYKWRKYGQKVVKNSLHPRSYYRCT  1 
Cp4.1LG15g08170.1        (   76) DSWAWRKYGQKPIKGSPYPRGYYRCS  1 
Cp4.1LG05g01350.1        (  213) DEYSWRKYGQKPIKGSPHPRGYYKCS  1 
Cp4.1LG04g02780.1        (   67) DSWAWRKYGQKPIKGSPYPRGYYRCS  1 
Cp4.1LG02g16210.1        (   68) DFWSWRKYGQKPIKGSPYPRGYYRCS  1 
Cp4.1LG01g12160.1        (  205) DGYNWRKYGQKQVKGGEFPRSYYKCT  1 
Cp4.1LG08g01440.1        (  160) DIWAWRKYGQKPIKGSPYPRGYYRCS  1 
Cp4.1LG20g04680.1        (   74) DSWAWRKYGQKPIKGSPYPRAYYRCS  1 
Cp4.1LG13g02760.1        (  179) DMWAWRKYGQKPIKGSPYPRNYYRCS  1 
Cp4.1LG05g06330.1        (  170) DMWAWRKYGQKPIKGSPYPRNYYRCS  1 
Cp4.1LG19g07870.1        (  348) DGCQWRKYGQKMAKGNPCPRAYYRCT  1 
Cp4.1LG15g07340.1        (  281) DGCQWRKYGQKMAKGNPCPRAYYRCT  1 
Cp4.1LG10g09790.1        (  347) DGCQWRKYGQKMAKGNPCPRAYYRCT  1 
Cp4.1LG01g00130.1        (  106) DGYRWRKYGQKAVKHSTHPRSYYRCT  1 
Cp4.1LG14g02220.1        (  223) DSWGWRKYGQKPIKGSPYPRSYYRCS  1 
Cp4.1LG09g07110.1        (  191) DLWAWRKYGQKPIKGSPYPRGYYRCS  1 
Cp4.1LG01g00250.1        (   82) DSWGWRKYGQKPIKGSPYPRSYYRCS  1 
Cp4.1LG20g01990.1        (  152) DGCQWRKYGQKIAKGNPCPRAYYRCT  1 
Cp4.1LG10g08390.1        (  130) DGYKWRKYGQKSIKNSPNPRSYYRCS  1 
Cp4.1LG01g01970.1        (  239) DGCQWRKYGQKIAKGNPCPRAYYRCT  1 
Cp4.1LG06g04620.1        (  265) DEFSWRKYGQKPIKGSPYPRAYYKCS  1 
Cp4.1LG10g03040.1        (  144) DGYKWRKYGQKVVKNTLHPRSYYRCT  1 
Cp4.1LG16g00060.1        (  145) DGYKWRKYGQKVVKNTQHPRSYYRCT  1 
Cp4.1LG01g00360.1        (  133) DGYSWRKYGQKDILGATYPRSYYRCT  1 
Cp4.1LG14g02520.1        (  132) DGYSWRKYGQKDILGATFPRSYYRCT  1 
Cp4.1LG04g03970.1        (  111) DGYNWRKYGQKLVKGNVFVRSYYRCT  1 
Cp4.1LG07g03150.1        (  149) DGYQWRKYGQKVTKDNPSPRAYYKCS  1 
Cp4.1LG03g02050.1        (  392) KGIRWRKYGQKVVKGNLYPRSYYRCT  1 
Cp4.1LG03g08890.1        (   74) DGYQWRKYGQKVTRDNPCPRAYFKCS  1 
Cp4.1LG02g15110.1        (  161) DGYQWRKYGQKVTRDNPCPRAYFKCS  1 
Cp4.1LG08g00890.1        (  115) DGYSWRKYGQKDIHGANFPRCYYRCT  1 
Cp4.1LG17g10220.1        (  162) DGFSWRKYGQKDILGSKFPRGYFRCS  1 
Cp4.1LG12g04760.1        (   94) DGFSWRKYGQKDILGSKFPRGYFRCS  1 
Cp4.1LG06g03010.1        (  146) DGYQWRKYGQKVTRDNPSPRAYFKCS  1 
Cp4.1LG02g05340.1        (  166) DGYQWRKYGQKVTRDNPSPRAYFKCS  1 
Cp4.1LG19g11800.1        (   94) DGFKWRKYGKKSIKNNPNPRNYYKCS  1 
Cp4.1LG14g06650.1        (  137) DGFCWRKYGQKGILGARHPRGYYRCT  1 
Cp4.1LG18g05560.1        (  196) DGYNWRKYGQKQVKSPKGSRSYYKCT  1 
//

--------------------------------------------------------------------------------

--------------------------------------------------------------------------------
	Motif DGYRWRKYGQKPVKGSPYPRSYYRCT MEME-1 position-specific scoring matrix
--------------------------------------------------------------------------------
log-odds matrix: alength= 20 w= 26 n= 24380 bayes= 9.17861 E= 1.5e-1802 
  -821   -811    413   -660   -862   -777   -790   -863   -234   -870   -892   -657   -911   -849   -853   -900   -857   -884   -747   -829 
  -325   -472     20    -32   -187    364   -497   -181   -465   -270    -26   -390   -598   -518   -455   -133   -497   -508   -426   -517 
  -780    176   -850   -840     91   -814   -494   -145   -801   -585   -619   -712   -881   -711   -735   -829   -761   -674    398    470 
    41    -58   -464   -405   -622   -131   -438   -531     37   -530   -493    166   -640    140    243     80   -461   -538   -523   -529 
  -974   -873   -935  -1016   -886   -846   -915  -1005  -1006   -933  -1018   -983   -955   -979   -940  -1065   -978  -1020    703   -875 
  -957   -862   -932  -1011   -939   -843   -890   -994   -915   -945  -1022   -967   -947   -944    424  -1051   -967  -1025   -789   -919 
  -930   -857   -925   -982   -935   -839   -897   -955    402   -937   -989   -945   -944   -941   -763  -1040   -944  -1000   -789   -912 
  -963   -859   -935  -1010   -677   -847   -824   -939   -994   -889   -953   -953   -953   -951   -926  -1044   -961   -973   -658    514 
  -888   -860   -902   -979   -934    402   -904   -991   -972   -950  -1009   -931   -945   -963   -918  -1004   -951   -999   -793   -914 
  -921   -863   -918   -925   -927   -837   -849   -980   -232   -925   -960   -934   -944    444   -851  -1020   -942   -996   -790   -900 
  -930   -857   -925   -982   -935   -839   -897   -955    402   -937   -989   -945   -944   -941   -763  -1040   -944  -1000   -789   -912 
   138   -372      5   -481   -349   -223    -37     31   -472    -57    117   -494    173    134   -475   -221   -365    184   -359   -386 
    -7   -549   -905   -862   -610   -851   -966    342   -876   -445   -491   -857   -923   -902   -914   -887      5    325   -793   -748 
  -435   -466   -576   -485   -606   -541   -182   -429    383    -71   -459   -456   -608   -415      9   -591   -468   -520   -426   -528 
  -511   -632     16   -464   -699    347   -128   -706   -514   -730   -704    195   -680   -516   -576   -300   -513   -707   -633   -124 
   -27   -487   -583   -668   -741   -214   -673   -701   -715   -732   -681    246   -261   -666   -716    230   -118   -594   -691   -733 
  -192   -499   -495    101   -529   -499   -500   -458      7    -94   -482   -215    314   -187   -210   -478    -78   -210   -524   -566 
  -636    223   -665   -690    231   -233    221   -566   -694   -546   -566    156   -793   -650   -664   -175   -666   -611   -286    378 
  -351   -512   -535   -497   -563   -518   -538   -493   -495   -498   -517   -553    364   -484   -512   -308   -457   -209   -555   -601 
  -957   -862   -932  -1011   -939   -843   -890   -994   -915   -945  -1022   -967   -947   -944    424  -1051   -967  -1025   -789   -919 
   123    -49   -768   -776   -745    190   -771   -695   -814   -729   -673    -11   -713   -720   -753    218   -510   -579   -693   -774 
  -963   -859   -935  -1010   -677   -847   -824   -939   -994   -889   -953   -953   -953   -951   -926  -1044   -961   -973   -658    514 
  -787   -681   -855   -847    115   -816   -504   -629   -809   -595   -629   -721   -886   -719   -743   -838   -769   -684   -305    501 
  -624   -714   -739   -578   -790   -685   -547   -649    290   -635   -610   -598   -788   -453    332   -716   -615   -666   -614   -659 
  -574    580   -732   -696   -661   -704   -702   -566   -751   -642   -596   -719   -790   -726   -689   -755   -610   -656   -645   -712 
  -466   -558   -789   -809   -764   -605   -780   -673   -789   -753   -675   -680   -780   -740   -758    166    338   -628   -695   -786 
--------------------------------------------------------------------------------

--------------------------------------------------------------------------------
	Motif DGYRWRKYGQKPVKGSPYPRSYYRCT MEME-1 position-specific probability matrix
--------------------------------------------------------------------------------
letter-probability matrix: alength= 20 w= 26 nsites= 82 E= 1.5e-1802 
 0.000000  0.000000  0.987805  0.000000  0.000000  0.000000  0.000000  0.000000  0.012195  0.000000  0.000000  0.000000  0.000000  0.000000  0.000000  0.000000  0.000000  0.000000  0.000000  0.000000 
 0.000000  0.000000  0.085366  0.060976  0.012195  0.731707  0.000000  0.012195  0.000000  0.012195  0.024390  0.000000  0.000000  0.000000  0.000000  0.060976  0.000000  0.000000  0.000000  0.000000 
 0.000000  0.060976  0.000000  0.000000  0.060976  0.000000  0.000000  0.012195  0.000000  0.000000  0.000000  0.000000  0.000000  0.000000  0.000000  0.000000  0.000000  0.000000  0.121951  0.743902 
 0.085366  0.012195  0.000000  0.000000  0.000000  0.024390  0.000000  0.000000  0.073171  0.000000  0.000000  0.170732  0.000000  0.121951  0.292683  0.219512  0.000000  0.000000  0.000000  0.000000 
 0.000000  0.000000  0.000000  0.000000  0.000000  0.000000  0.000000  0.000000  0.000000  0.000000  0.000000  0.000000  0.000000  0.000000  0.000000  0.000000  0.000000  0.000000  1.000000  0.000000 
 0.000000  0.000000  0.000000  0.000000  0.000000  0.000000  0.000000  0.000000  0.000000  0.000000  0.000000  0.000000  0.000000  0.000000  1.000000  0.000000  0.000000  0.000000  0.000000  0.000000 
 0.000000  0.000000  0.000000  0.000000  0.000000  0.000000  0.000000  0.000000  1.000000  0.000000  0.000000  0.000000  0.000000  0.000000  0.000000  0.000000  0.000000  0.000000  0.000000  0.000000 
 0.000000  0.000000  0.000000  0.000000  0.000000  0.000000  0.000000  0.000000  0.000000  0.000000  0.000000  0.000000  0.000000  0.000000  0.000000  0.000000  0.000000  0.000000  0.000000  1.000000 
 0.000000  0.000000  0.000000  0.000000  0.000000  1.000000  0.000000  0.000000  0.000000  0.000000  0.000000  0.000000  0.000000  0.000000  0.000000  0.000000  0.000000  0.000000  0.000000  0.000000 
 0.000000  0.000000  0.000000  0.000000  0.000000  0.000000  0.000000  0.000000  0.012195  0.000000  0.000000  0.000000  0.000000  0.987805  0.000000  0.000000  0.000000  0.000000  0.000000  0.000000 
 0.000000  0.000000  0.000000  0.000000  0.000000  0.000000  0.000000  0.000000  1.000000  0.000000  0.000000  0.000000  0.000000  0.000000  0.000000  0.000000  0.000000  0.000000  0.000000  0.000000 
 0.170732  0.000000  0.060976  0.000000  0.000000  0.012195  0.024390  0.036585  0.000000  0.036585  0.048780  0.000000  0.268293  0.121951  0.000000  0.024390  0.000000  0.195122  0.000000  0.000000 
 0.060976  0.000000  0.000000  0.000000  0.000000  0.000000  0.000000  0.365854  0.000000  0.000000  0.000000  0.000000  0.000000  0.000000  0.000000  0.000000  0.060976  0.512195  0.000000  0.000000 
 0.000000  0.000000  0.000000  0.000000  0.000000  0.000000  0.012195  0.000000  0.865854  0.060976  0.000000  0.000000  0.000000  0.000000  0.060976  0.000000  0.000000  0.000000  0.000000  0.000000 
 0.000000  0.000000  0.060976  0.000000  0.000000  0.695122  0.012195  0.000000  0.000000  0.000000  0.000000  0.207317  0.000000  0.000000  0.000000  0.012195  0.000000  0.000000  0.000000  0.012195 
 0.048780  0.000000  0.000000  0.000000  0.000000  0.012195  0.000000  0.000000  0.000000  0.000000  0.000000  0.292683  0.012195  0.000000  0.000000  0.609756  0.024390  0.000000  0.000000  0.000000 
 0.012195  0.000000  0.000000  0.134146  0.000000  0.000000  0.000000  0.000000  0.073171  0.036585  0.000000  0.012195  0.658537  0.012195  0.012195  0.000000  0.036585  0.012195  0.000000  0.000000 
 0.000000  0.085366  0.000000  0.000000  0.170732  0.012195  0.146341  0.000000  0.000000  0.000000  0.000000  0.158537  0.000000  0.000000  0.000000  0.036585  0.000000  0.000000  0.000000  0.390244 
 0.000000  0.000000  0.000000  0.000000  0.000000  0.000000  0.000000  0.000000  0.000000  0.000000  0.000000  0.000000  0.975610  0.000000  0.000000  0.012195  0.000000  0.012195  0.000000  0.000000 
 0.000000  0.000000  0.000000  0.000000  0.000000  0.000000  0.000000  0.000000  0.000000  0.000000  0.000000  0.000000  0.000000  0.000000  1.000000  0.000000  0.000000  0.000000  0.000000  0.000000 
 0.146341  0.012195  0.000000  0.000000  0.000000  0.231707  0.000000  0.000000  0.000000  0.000000  0.000000  0.048780  0.000000  0.000000  0.000000  0.560976  0.000000  0.000000  0.000000  0.000000 
 0.000000  0.000000  0.000000  0.000000  0.000000  0.000000  0.000000  0.000000  0.000000  0.000000  0.000000  0.000000  0.000000  0.000000  0.000000  0.000000  0.000000  0.000000  0.000000  1.000000 
 0.000000  0.000000  0.000000  0.000000  0.073171  0.000000  0.000000  0.000000  0.000000  0.000000  0.000000  0.000000  0.000000  0.000000  0.000000  0.000000  0.000000  0.000000  0.000000  0.926829 
 0.000000  0.000000  0.000000  0.000000  0.000000  0.000000  0.000000  0.000000  0.463415  0.000000  0.000000  0.000000  0.000000  0.000000  0.536585  0.000000  0.000000  0.000000  0.000000  0.000000 
 0.000000  1.000000  0.000000  0.000000  0.000000  0.000000  0.000000  0.000000  0.000000  0.000000  0.000000  0.000000  0.000000  0.000000  0.000000  0.000000  0.000000  0.000000  0.000000  0.000000 
 0.000000  0.000000  0.000000  0.000000  0.000000  0.000000  0.000000  0.000000  0.000000  0.000000  0.000000  0.000000  0.000000  0.000000  0.000000  0.390244  0.609756  0.000000  0.000000  0.000000 
--------------------------------------------------------------------------------

--------------------------------------------------------------------------------
	Motif DGYRWRKYGQKPVKGSPYPRSYYRCT MEME-1 regular expression
--------------------------------------------------------------------------------
DGY[RS]WRKYGQKP[VI]K[GN][SN]PYPR[SG]YY[RK]C[TS]
--------------------------------------------------------------------------------


Time 244.81 secs.

********************************************************************************


********************************************************************************
MOTIF CPVRKQVERSSEDPSMVITTY MEME-2	width =  21  sites =  87  llr = 3442  E-value = 1.3e-1012
********************************************************************************
--------------------------------------------------------------------------------
	Motif CPVRKQVERSSEDPSMVITTY MEME-2 Description
--------------------------------------------------------------------------------
Simplified        A  ::4::::::21:::11::1::
pos.-specific     C  a::::::::1:::::::::::
probability       D  ::::::::::128::::::::
matrix            E  :::::::8:::3::::11:::
                  F  ::::::::::::::::1::::
                  G  :1::::::::::1::::::::
                  H  :::::3:::::1:1:::::::
                  I  ::::::::::::::12:72::
                  K  :::5a2::::::::1:::::1
                  L  :::::::::12::1::3::::
                  M  :::::::::::::::2:::::
                  N  :::::::::::1:::::::::
                  P  :5:::::::::::6:::::::
                  Q  :::::3:2:::::1:::::::
                  R  :::5:2::a:1:::1::::::
                  S  :1:::::::43:::3::::::
                  T  ::::::::::::::22::49:
                  V  ::6:::9:::1::::2423::
                  W  :::::::::::::::::::::
                  Y  :::::::::::::::::::19

         bits    7.0                      
                 6.3                      
                 5.6 *                    
                 4.9 *                    
Relative         4.2 *   *   *           *
Entropy          3.5 *   * ***   *    * **
(57.1 bits)      2.8 * *** ***   *    ****
                 2.1 * *******   **  *****
                 1.4 * ******** *** ******
                 0.7 *********************
                 0.0 ---------------------

Multilevel           CPVRKQVERSSEDPSMVITTY
consensus              AK H Q ALD    LVV  
sequence                  R            I  
                                          
                                          
--------------------------------------------------------------------------------

--------------------------------------------------------------------------------
	Motif CPVRKQVERSSEDPSMVITTY MEME-2 sites sorted by position p-value
--------------------------------------------------------------------------------
Sequence name             Start   P-value                    Site       
-------------             ----- ---------            ---------------------
Cp4.1LG15g00430.1           274  1.29e-24 GYYKCSSMRG CPARKHVERCLEDPSMLIVTY EGEHNHPKMS
Cp4.1LG06g01700.1           343  8.32e-24 GYYKCSSLRG CPARKHVERALDDPTMLIVTY ENDHNHAHST
Cp4.1LG02g06760.1           343  8.32e-24 GYYKCSSLRG CPARKHVERALDDPTMLIVTY ENDHNHALST
Cp4.1LG16g01500.1           241  2.47e-23 GYYKCSSLRG CPARKHVERASDDPTMLIVTY EGDHNHSQSV
Cp4.1LG05g11790.1           237  4.09e-23 GYYKCSSLRG CPARKHVERASDDPSMLIVTY EGDHNHSQSV
Cp4.1LG14g07630.1           390  8.39e-23 GSYYKCTNVG CPVRKHVERASHDPKAVITTY EGKHNHDVPT
Cp4.1LG08g08540.1           428  8.39e-23 RSYYKCTNVG CPVRKHVERASHDPKAVITTY EGKHNHDVPT
Cp4.1LG01g01970.1           269  5.81e-22 AYYRCTVAPG CPVRKQVQRCLEDMSILITTY EGTHNHPLPV
Cp4.1LG10g05720.1           149  7.09e-22 RSYYRCTTQK CGVKKRVERSYEDPSIVITTY EGQHNHPIPA
Cp4.1LG11g03940.1           185  2.64e-21 RSYYRCTNSK CTVKKRVERSSEDPSVVITTY EGQHCHHTVG
Cp4.1LG11g03520.1           105  2.64e-21 RNYYKCSVEG CPVKKRVERDREDPKYVITTY EGVHTHESS 
Cp4.1LG07g00870.1            74  3.15e-21 RSYYRCTNSK CTVKKRVERSSDDPTVVITTY EGQHCHHTVG
Cp4.1LG20g01990.1           182  3.76e-21 AYYRCTGSPT CPVRKQVQRCADDMSILITTY EGNHNHPLPA
Cp4.1LG07g05980.1           116  4.47e-21 RNYYKCSVEG CPVKKRVERDRDDPKYVITTY EGVHTHESS 
Cp4.1LG15g07340.1           311  6.28e-21 AYYRCTMAAG CPVRKQVQRCAEDKTILITTY EGNHNHPLPP
Cp4.1LG04g13250.1           237  7.43e-21 GYYRCSAVKG CPARKKVERARDDPAMLVVTY DGDHRHPPAT
Cp4.1LG10g03040.1           173  8.76e-21 RSYYRCTEEN CKVKKRVERLAEDPRMVITTY EGRHAHSPSD
Cp4.1LG19g11130.1           162  1.03e-20 GYYKCSSMRG CPARKHVERAVDDPAILVVTY EGEHNHTLTV
Cp4.1LG17g07650.1            68  1.03e-20 RSYYRCTSVA CHVKKRVERCLKDPSIVITTY EGQHTHSTPV
Cp4.1LG02g11140.1           404  1.03e-20 RSYYKCTNPG CPVRKHVERASHDLRAVITTY EGKHNHEVPP
Cp4.1LG17g00040.1            40  1.21e-20 RSYYRCTTAG CGVKKRVERSSHDPSVVVTTY EGQHNHQSPI
Cp4.1LG12g03320.1           162  1.21e-20 RSYYRCTTAG CGVKKRVERSSDDPSVVVTTY EGQHIHQSPI
Cp4.1LG04g03970.1           313  1.42e-20 RSYYRCSSPG CPVKKHVERASHDPKVVLTTY EGHHDHDMPP
Cp4.1LG16g00060.1           174  1.67e-20 RSYYRCTQDH CRVKKRVERLAEDPRMVITTY EGRHVHSPSH
Cp4.1LG17g06230.1           303  1.95e-20 GYYKCSSMRG CPARKHVERCVEEPSMLIVTY EGEHNHPRIA
Cp4.1LG19g07870.1           378  2.27e-20 AYYRCTMAVG CPVRKQVQRCAEDTTILITTY EGNHNHPLPP
Cp4.1LG10g09790.1           377  2.27e-20 AYYRCTMAVG CPVRKQVQRCAEDRTILITTY EGNHNHPLPP
Cp4.1LG01g12160.1           409  2.65e-20 RSYYKCTTSG CNVRKHVERASTDPKAVITTY EGKHNHDVPA
Cp4.1LG10g02340.1           273  4.16e-20 GYYKCSSVRG CPARKHVERAGDDPAMLVVTY EGEHNHTLSL
Cp4.1LG05g01350.1           243  4.16e-20 GYYKCSSMRG CPARKHVERCLQQPSMLIVTY EGEHNHPTMS
Cp4.1LG02g05340.1           196  4.81e-20 AYFKCSSAPN CPVKKKVQRSLEDPTILVATY EGEHSHASHF
Cp4.1LG15g08740.1           186  8.54e-20 RSYYRCTSQK CLVKKRVERSYQDPSVVITTY EGQHNHHCPA
Cp4.1LG00g01540.1           320  8.54e-20 RSYYKCTSAG CSVRKHVERASHDLKCVITTY EGKHNHLVPA
Cp4.1LG02g04820.1           300  9.82e-20 GYYKCSSMRG CPARKHVERDPNDPAMLIVTY EGEHRHTQSS
Cp4.1LG08g05270.1           194  1.13e-19 RSYYRCTTSQ CGVKKRVERSSSDHSIVITTY EGQHTHQSPV
Cp4.1LG06g03010.1           176  1.48e-19 AYFKCSSAPN CPVKKKVQRSLEDPAILVATY EGEHNHASHF
Cp4.1LG06g04620.1           295  1.70e-19 AYYKCSTMRG CPARKHVERNPKDPAMLIITY EGEHRHTPSS
Cp4.1LG18g02530.1           514  2.88e-19 RSYYKCTSAG CAVRKHVERASHDLKCVITTY EGKHNHEVPA
Cp4.1LG03g15600.1           171  2.88e-19 RSYYRCTHNN CRVKKRVERLSEDCRMVITTY EGRHNHSPCD
Cp4.1LG14g08130.1           524  3.27e-19 RSYYKCTNPG CTVRKHVERASHDLKSVITTY EGKHNHDVPA
Cp4.1LG08g08130.1           567  3.27e-19 RSYYKCTNPG CTVRKHVERASHDLKSVITTY EGKHNHDVPA
Cp4.1LG09g07110.1           221  3.72e-19 GYYRCSSSKG CSARKQVERSRTDPNMLVITY TSEHNHPWPT
Cp4.1LG05g09980.1           484  4.22e-19 YGQKVCTYAG CGVRKHIERASHDLKAVITTY EGKHNHEIPA
Cp4.1LG15g08170.1           106  5.43e-19 GYYRCSSSKG CPARKQVERSRVDPTKLVITY AFDHNHQLPA
Cp4.1LG04g02780.1            97  5.43e-19 GYYRCSSSKG CPARKQVERSRVDPTKLVITY SFDHNHQLPA
Cp4.1LG12g06240.1           161  6.15e-19 RSYYRCTSVA CNVKKRVERYLKDPSIVVTTY EGQHTHSSPN
Cp4.1LG03g03290.1           348  6.15e-19 RSYYKCTSLG CPVRKHIERAANDMRAVITTY EGKHNHEVPA
Cp4.1LG18g06480.1            66  6.95e-19 GYYRCSTVKG CPARKKVERVRDDPTMLLVTY DGDHRHPQPP
Cp4.1LG02g15110.1           191  7.86e-19 AYFKCSFAPT CPVKKKVQRSVEDQSILVATY EGEHNHPQSS
Cp4.1LG08g01440.1           190  8.87e-19 GYYRCSSSKG CMARKQVERNRSDPGMFIVTY TAEHNHPAPT
Cp4.1LG03g11900.1           175  8.87e-19 RSYYRCTTVG CGVKKRVERLSNDHSTVVTTY EGKHTHQSPI
Cp4.1LG16g07300.1           161  1.13e-18 RSYYKCTSQN CSVKKRVERSSEDPCFVVTTY EGKHNHYCPI
Cp4.1LG19g11800.1           123  1.43e-18 RNYYKCSSSG CGVKKRVERDREDSSYVITTY EGIHSHESPF
Cp4.1LG03g08890.1           104  1.43e-18 AYFKCSFAPT CPVKKKVQRSVEDQSVLVATY EGEHNHPQAS
Cp4.1LG10g08390.1           159  1.60e-18 RSYYRCSNPR CSAKKQVERSIEDPDTFVITY EGLHLHFAYP
Cp4.1LG20g04680.1           104  1.80e-18 AYYRCSSSKG CPARKQVERNRLDPTMLLITY SCEHNHSGPV
Cp4.1LG05g06330.1           200  1.80e-18 NYYRCSSSKG CGARKQVERSTADPETFIVTY TGDHTHPRPT
Cp4.1LG04g02450.1           136  2.54e-18 RSYYRCTSQK CVVKKRVERSYQDPSLVITTY EGQHIHHCPA
Cp4.1LG09g02180.1           230  3.18e-18 RSYYKCTYPN CPVKKKVERSLEGHITEIIYK GEHNHERPQP
Cp4.1LG14g02220.1           253  3.98e-18 SYYRCSSSKG CSARKQVERSLSDPGAFVVTY TAEHNHAEPT
Cp4.1LG01g00250.1           112  5.52e-18 SYYRCSSSKG CSARKQVERSFSDPDVFIVTY TAEHNHAEPT
Cp4.1LG03g02050.1           421  6.15e-18 RSYYRCTGLK CKARKYVERASEDPDSFITTY EGKHNHDISL
Cp4.1LG02g16210.1            98  7.62e-18 GYYRCSTTKG CSAKKQVERCKTDGSMFIITY TSTHNHPGPN
Cp4.1LG13g02760.1           209  1.16e-17 NYYRCSSSKG CGARKQVERSNADPESFIITY TGEHIHPRPT
Cp4.1LG01g00360.1           165  1.29e-17 YRCTFRNTQN CWAVKQVQRSDEDPSVFEITY RGKHTCSQGN
Cp4.1LG01g00130.1           135  1.58e-17 RSYYRCTHHT CNVKKQIQRHSKDPTIVVTTY EGIHNHPSEK
Cp4.1LG18g02530.1           289  2.15e-17 RSYYKCTHPN CQVKKKVERSLDGQITEIIYK GAHIHAKPDP
Cp4.1LG01g12160.1           234  2.63e-17 RSYYKCTHPN CPVRKKVERSLEGQVTEIIYK GEHNHKQPQP
Cp4.1LG03g02050.1           226  2.90e-17 RSYYKCTHPS CPVKKKVERSLDGKIAEIVYK GEHDHPKPQP
Cp4.1LG14g02520.1           164  3.20e-17 YRCTFRNTQN CWAIKQVQRSDEDHSVFEITY RGKHTCSQGN
Cp4.1LG14g08130.1           333  3.53e-17 RSYYKCTHPN CQVKKKVERSHEGHITEIIYK GTHNHVKPSP
Cp4.1LG14g06650.1           169  6.96e-17 YRCTHRNLQG CLATKQVQRSDHDPNVFEITY RGTHSCTQVI
Cp4.1LG08g08130.1           352  9.25e-17 RSYYKCTHPN CQVKKKVERSNEGHITEIIYK GTHNHPKPSP
Cp4.1LG03g03290.1           199  9.25e-17 RSYYKCTFPN CPTKKKVERSLDGQITEIVYK GSHNHAKPQP
Cp4.1LG02g11140.1           234  9.25e-17 RSYYKCTFPN CPTKKKVERSLDGQITEIVYK GSHNHPKPQS
Cp4.1LG07g03150.1           179  1.02e-16 AYYKCSFAPS CPVKKKVQRSVQDSSYLVATY EGEHNHKKPN
Cp4.1LG05g09980.1           343  1.02e-16 RSYYKCTHPT CPVRKQVEKSLNGQITEIVYK SKHNHPKPEF
Cp4.1LG17g10220.1           194  1.23e-16 FRCSHRFAQG CSATKQVQRLDNDPSMYEITY RGKHTCNKSL
Cp4.1LG03g06840.1           123  1.62e-16 RSYYRCTHQG CNVKKQVQRLTRDEGVVVTTY EGMHTHSIDK
Cp4.1LG03g12920.1           119  1.77e-16 RSYYRCTHQG CKVKKQVQRLTRDEGVVVTTY EGIHSHPILK
Cp4.1LG00g01540.1           104  3.05e-16 RSYYKCTHPN CIVKKKVERSLDGQITEIIYT GAHNHSKPDP
Cp4.1LG18g05560.1           398  3.98e-16 RNYYRCTSAG CPVRKHIESAVENPYAVIITY KGVHDHDMPV
Cp4.1LG12g04760.1           126  1.45e-15 FRCSHRFTLG CKATKQVQKSDNDPTIYEVTY KGTHTCNRPL
Cp4.1LG08g00890.1           147  1.87e-15 YRCTHRNVRG CLATKQVQKSDNDPNIFEVTY RGRHTCNQSA
Cp4.1LG08g08540.1           252  6.89e-15 RSYYKCTHPN CEVKKLFERSHDGQIVDIIYK GTHDHPKPQP
Cp4.1LG14g07630.1           236  9.45e-15 RSYYKCTHPN CEVKKLFERSHDGQITDIVYK GTHDHPKLQP
Cp4.1LG04g03970.1           140  6.83e-14 RSYYRCTHPT CMVKKQLERTHDGKITDIIYF GPHDHPRPQP
--------------------------------------------------------------------------------

--------------------------------------------------------------------------------
	Motif CPVRKQVERSSEDPSMVITTY MEME-2 block diagrams
--------------------------------------------------------------------------------
SEQUENCE NAME            POSITION P-VALUE  MOTIF DIAGRAM
-------------            ----------------  -------------
Cp4.1LG15g00430.1                 1.3e-24  273_[2]_16
Cp4.1LG06g01700.1                 8.3e-24  342_[2]_21
Cp4.1LG02g06760.1                 8.3e-24  342_[2]_21
Cp4.1LG16g01500.1                 2.5e-23  240_[2]_21
Cp4.1LG05g11790.1                 4.1e-23  236_[2]_21
Cp4.1LG14g07630.1                 9.5e-15  235_[2]_133_[2]_123
Cp4.1LG08g08540.1                 6.9e-15  251_[2]_155_[2]_130
Cp4.1LG01g01970.1                 5.8e-22  268_[2]_188
Cp4.1LG10g05720.1                 7.1e-22  148_[2]_97
Cp4.1LG11g03940.1                 2.6e-21  184_[2]_109
Cp4.1LG11g03520.1                 2.6e-21  104_[2]_9
Cp4.1LG07g00870.1                 3.2e-21  73_[2]_90
Cp4.1LG20g01990.1                 3.8e-21  181_[2]_290
Cp4.1LG07g05980.1                 4.5e-21  115_[2]_9
Cp4.1LG15g07340.1                 6.3e-21  310_[2]_190
Cp4.1LG04g13250.1                 7.4e-21  236_[2]_27
Cp4.1LG10g03040.1                 8.8e-21  172_[2]_26
Cp4.1LG19g11130.1                   1e-20  161_[2]_20
Cp4.1LG17g07650.1                   1e-20  67_[2]_61
Cp4.1LG02g11140.1                 9.3e-17  233_[2]_149_[2]_126
Cp4.1LG17g00040.1                 1.2e-20  39_[2]_111
Cp4.1LG12g03320.1                 1.2e-20  161_[2]_91
Cp4.1LG04g03970.1                 6.8e-14  139_[2]_152_[2]_92
Cp4.1LG16g00060.1                 1.7e-20  173_[2]_26
Cp4.1LG17g06230.1                 1.9e-20  302_[2]_16
Cp4.1LG19g07870.1                 2.3e-20  377_[2]_223
Cp4.1LG10g09790.1                 2.3e-20  376_[2]_216
Cp4.1LG01g12160.1                 2.6e-17  233_[2]_154_[2]_57
Cp4.1LG10g02340.1                 4.2e-20  272_[2]_21
Cp4.1LG05g01350.1                 4.2e-20  242_[2]_21
Cp4.1LG02g05340.1                 4.8e-20  195_[2]_109
Cp4.1LG15g08740.1                 8.5e-20  185_[2]_85
Cp4.1LG00g01540.1                 3.1e-16  103_[2]_195_[2]_158
Cp4.1LG02g04820.1                 9.8e-20  299_[2]_26
Cp4.1LG08g05270.1                 1.1e-19  193_[2]_109
Cp4.1LG06g03010.1                 1.5e-19  175_[2]_107
Cp4.1LG06g04620.1                 1.7e-19  294_[2]_26
Cp4.1LG18g02530.1                 2.1e-17  288_[2]_204_[2]_240
Cp4.1LG03g15600.1                 2.9e-19  170_[2]_23
Cp4.1LG14g08130.1                 3.5e-17  332_[2]_170_[2]_156
Cp4.1LG08g08130.1                 9.3e-17  351_[2]_194_[2]_153
Cp4.1LG09g07110.1                 3.7e-19  220_[2]_146
Cp4.1LG05g09980.1                   1e-16  342_[2]_120_[2]_71
Cp4.1LG15g08170.1                 5.4e-19  105_[2]_169
Cp4.1LG04g02780.1                 5.4e-19  96_[2]_157
Cp4.1LG12g06240.1                 6.1e-19  160_[2]_112
Cp4.1LG03g03290.1                 9.3e-17  198_[2]_128_[2]_107
Cp4.1LG18g06480.1                   7e-19  65_[2]_23
Cp4.1LG02g15110.1                 7.9e-19  190_[2]_92
Cp4.1LG08g01440.1                 8.9e-19  189_[2]_123
Cp4.1LG03g11900.1                 8.9e-19  174_[2]_107
Cp4.1LG16g07300.1                 1.1e-18  160_[2]_68
Cp4.1LG19g11800.1                 1.4e-18  122_[2]_36
Cp4.1LG03g08890.1                 1.4e-18  103_[2]_90
Cp4.1LG10g08390.1                 1.6e-18  158_[2]_117
Cp4.1LG20g04680.1                 1.8e-18  103_[2]_150
Cp4.1LG05g06330.1                 1.8e-18  199_[2]_109
Cp4.1LG04g02450.1                 2.5e-18  135_[2]_85
Cp4.1LG09g02180.1                 3.2e-18  229_[2]_200
Cp4.1LG14g02220.1                   4e-18  252_[2]_70
Cp4.1LG01g00250.1                 5.5e-18  111_[2]_83
Cp4.1LG03g02050.1                 2.9e-17  225_[2]_174_[2]_21
Cp4.1LG02g16210.1                 7.6e-18  97_[2]_119
Cp4.1LG13g02760.1                 1.2e-17  208_[2]_113
Cp4.1LG01g00360.1                 1.3e-17  164_[2]_171
Cp4.1LG01g00130.1                 1.6e-17  134_[2]_28
Cp4.1LG14g02520.1                 3.2e-17  163_[2]_169
Cp4.1LG14g06650.1                   7e-17  168_[2]_191
Cp4.1LG07g03150.1                   1e-16  178_[2]_111
Cp4.1LG17g10220.1                 1.2e-16  193_[2]_125
Cp4.1LG03g06840.1                 1.6e-16  122_[2]_29
Cp4.1LG03g12920.1                 1.8e-16  118_[2]_28
Cp4.1LG18g05560.1                   4e-16  397_[2]_88
Cp4.1LG12g04760.1                 1.5e-15  125_[2]_136
Cp4.1LG08g00890.1                 1.9e-15  146_[2]_165
--------------------------------------------------------------------------------

--------------------------------------------------------------------------------
	Motif CPVRKQVERSSEDPSMVITTY MEME-2 in BLOCKS format
--------------------------------------------------------------------------------
BL   MOTIF CPVRKQVERSSEDPSMVITTY width=21 seqs=87
Cp4.1LG15g00430.1        (  274) CPARKHVERCLEDPSMLIVTY  1 
Cp4.1LG06g01700.1        (  343) CPARKHVERALDDPTMLIVTY  1 
Cp4.1LG02g06760.1        (  343) CPARKHVERALDDPTMLIVTY  1 
Cp4.1LG16g01500.1        (  241) CPARKHVERASDDPTMLIVTY  1 
Cp4.1LG05g11790.1        (  237) CPARKHVERASDDPSMLIVTY  1 
Cp4.1LG14g07630.1        (  390) CPVRKHVERASHDPKAVITTY  1 
Cp4.1LG08g08540.1        (  428) CPVRKHVERASHDPKAVITTY  1 
Cp4.1LG01g01970.1        (  269) CPVRKQVQRCLEDMSILITTY  1 
Cp4.1LG10g05720.1        (  149) CGVKKRVERSYEDPSIVITTY  1 
Cp4.1LG11g03940.1        (  185) CTVKKRVERSSEDPSVVITTY  1 
Cp4.1LG11g03520.1        (  105) CPVKKRVERDREDPKYVITTY  1 
Cp4.1LG07g00870.1        (   74) CTVKKRVERSSDDPTVVITTY  1 
Cp4.1LG20g01990.1        (  182) CPVRKQVQRCADDMSILITTY  1 
Cp4.1LG07g05980.1        (  116) CPVKKRVERDRDDPKYVITTY  1 
Cp4.1LG15g07340.1        (  311) CPVRKQVQRCAEDKTILITTY  1 
Cp4.1LG04g13250.1        (  237) CPARKKVERARDDPAMLVVTY  1 
Cp4.1LG10g03040.1        (  173) CKVKKRVERLAEDPRMVITTY  1 
Cp4.1LG19g11130.1        (  162) CPARKHVERAVDDPAILVVTY  1 
Cp4.1LG17g07650.1        (   68) CHVKKRVERCLKDPSIVITTY  1 
Cp4.1LG02g11140.1        (  404) CPVRKHVERASHDLRAVITTY  1 
Cp4.1LG17g00040.1        (   40) CGVKKRVERSSHDPSVVVTTY  1 
Cp4.1LG12g03320.1        (  162) CGVKKRVERSSDDPSVVVTTY  1 
Cp4.1LG04g03970.1        (  313) CPVKKHVERASHDPKVVLTTY  1 
Cp4.1LG16g00060.1        (  174) CRVKKRVERLAEDPRMVITTY  1 
Cp4.1LG17g06230.1        (  303) CPARKHVERCVEEPSMLIVTY  1 
Cp4.1LG19g07870.1        (  378) CPVRKQVQRCAEDTTILITTY  1 
Cp4.1LG10g09790.1        (  377) CPVRKQVQRCAEDRTILITTY  1 
Cp4.1LG01g12160.1        (  409) CNVRKHVERASTDPKAVITTY  1 
Cp4.1LG10g02340.1        (  273) CPARKHVERAGDDPAMLVVTY  1 
Cp4.1LG05g01350.1        (  243) CPARKHVERCLQQPSMLIVTY  1 
Cp4.1LG02g05340.1        (  196) CPVKKKVQRSLEDPTILVATY  1 
Cp4.1LG15g08740.1        (  186) CLVKKRVERSYQDPSVVITTY  1 
Cp4.1LG00g01540.1        (  320) CSVRKHVERASHDLKCVITTY  1 
Cp4.1LG02g04820.1        (  300) CPARKHVERDPNDPAMLIVTY  1 
Cp4.1LG08g05270.1        (  194) CGVKKRVERSSSDHSIVITTY  1 
Cp4.1LG06g03010.1        (  176) CPVKKKVQRSLEDPAILVATY  1 
Cp4.1LG06g04620.1        (  295) CPARKHVERNPKDPAMLIITY  1 
Cp4.1LG18g02530.1        (  514) CAVRKHVERASHDLKCVITTY  1 
Cp4.1LG03g15600.1        (  171) CRVKKRVERLSEDCRMVITTY  1 
Cp4.1LG14g08130.1        (  524) CTVRKHVERASHDLKSVITTY  1 
Cp4.1LG08g08130.1        (  567) CTVRKHVERASHDLKSVITTY  1 
Cp4.1LG09g07110.1        (  221) CSARKQVERSRTDPNMLVITY  1 
Cp4.1LG05g09980.1        (  484) CGVRKHIERASHDLKAVITTY  1 
Cp4.1LG15g08170.1        (  106) CPARKQVERSRVDPTKLVITY  1 
Cp4.1LG04g02780.1        (   97) CPARKQVERSRVDPTKLVITY  1 
Cp4.1LG12g06240.1        (  161) CNVKKRVERYLKDPSIVVTTY  1 
Cp4.1LG03g03290.1        (  348) CPVRKHIERAANDMRAVITTY  1 
Cp4.1LG18g06480.1        (   66) CPARKKVERVRDDPTMLLVTY  1 
Cp4.1LG02g15110.1        (  191) CPVKKKVQRSVEDQSILVATY  1 
Cp4.1LG08g01440.1        (  190) CMARKQVERNRSDPGMFIVTY  1 
Cp4.1LG03g11900.1        (  175) CGVKKRVERLSNDHSTVVTTY  1 
Cp4.1LG16g07300.1        (  161) CSVKKRVERSSEDPCFVVTTY  1 
Cp4.1LG19g11800.1        (  123) CGVKKRVERDREDSSYVITTY  1 
Cp4.1LG03g08890.1        (  104) CPVKKKVQRSVEDQSVLVATY  1 
Cp4.1LG10g08390.1        (  159) CSAKKQVERSIEDPDTFVITY  1 
Cp4.1LG20g04680.1        (  104) CPARKQVERNRLDPTMLLITY  1 
Cp4.1LG05g06330.1        (  200) CGARKQVERSTADPETFIVTY  1 
Cp4.1LG04g02450.1        (  136) CVVKKRVERSYQDPSLVITTY  1 
Cp4.1LG09g02180.1        (  230) CPVKKKVERSLEGHITEIIYK  1 
Cp4.1LG14g02220.1        (  253) CSARKQVERSLSDPGAFVVTY  1 
Cp4.1LG01g00250.1        (  112) CSARKQVERSFSDPDVFIVTY  1 
Cp4.1LG03g02050.1        (  421) CKARKYVERASEDPDSFITTY  1 
Cp4.1LG02g16210.1        (   98) CSAKKQVERCKTDGSMFIITY  1 
Cp4.1LG13g02760.1        (  209) CGARKQVERSNADPESFIITY  1 
Cp4.1LG01g00360.1        (  165) CWAVKQVQRSDEDPSVFEITY  1 
Cp4.1LG01g00130.1        (  135) CNVKKQIQRHSKDPTIVVTTY  1 
Cp4.1LG18g02530.1        (  289) CQVKKKVERSLDGQITEIIYK  1 
Cp4.1LG01g12160.1        (  234) CPVRKKVERSLEGQVTEIIYK  1 
Cp4.1LG03g02050.1        (  226) CPVKKKVERSLDGKIAEIVYK  1 
Cp4.1LG14g02520.1        (  164) CWAIKQVQRSDEDHSVFEITY  1 
Cp4.1LG14g08130.1        (  333) CQVKKKVERSHEGHITEIIYK  1 
Cp4.1LG14g06650.1        (  169) CLATKQVQRSDHDPNVFEITY  1 
Cp4.1LG08g08130.1        (  352) CQVKKKVERSNEGHITEIIYK  1 
Cp4.1LG03g03290.1        (  199) CPTKKKVERSLDGQITEIVYK  1 
Cp4.1LG02g11140.1        (  234) CPTKKKVERSLDGQITEIVYK  1 
Cp4.1LG07g03150.1        (  179) CPVKKKVQRSVQDSSYLVATY  1 
Cp4.1LG05g09980.1        (  343) CPVRKQVEKSLNGQITEIVYK  1 
Cp4.1LG17g10220.1        (  194) CSATKQVQRLDNDPSMYEITY  1 
Cp4.1LG03g06840.1        (  123) CNVKKQVQRLTRDEGVVVTTY  1 
Cp4.1LG03g12920.1        (  119) CKVKKQVQRLTRDEGVVVTTY  1 
Cp4.1LG00g01540.1        (  104) CIVKKKVERSLDGQITEIIYT  1 
Cp4.1LG18g05560.1        (  398) CPVRKHIESAVENPYAVIITY  1 
Cp4.1LG12g04760.1        (  126) CKATKQVQKSDNDPTIYEVTY  1 
Cp4.1LG08g00890.1        (  147) CLATKQVQKSDNDPNIFEVTY  1 
Cp4.1LG08g08540.1        (  252) CEVKKLFERSHDGQIVDIIYK  1 
Cp4.1LG14g07630.1        (  236) CEVKKLFERSHDGQITDIVYK  1 
Cp4.1LG04g03970.1        (  140) CMVKKQLERTHDGKITDIIYF  1 
//

--------------------------------------------------------------------------------

--------------------------------------------------------------------------------
	Motif CPVRKQVERSSEDPSMVITTY MEME-2 position-specific scoring matrix
--------------------------------------------------------------------------------
log-odds matrix: alength= 20 w= 21 n= 24765 bayes= 7.68453 E= 1.3e-1012 
  -598    581   -753   -719   -683   -722   -723   -590   -773   -665   -621   -741   -809   -748   -711   -777   -633   -680   -664   -733 
  -182   -493   -346    -94   -471     66   -122   -144    -25    -88      6    -15    248    -26    -97    -41    -29   -197    149   -409 
   248   -492   -832   -813   -717   -538   -815   -442   -845   -626   -625   -730   -746   -757   -787   -558   -128    352   -717   -781 
  -567   -670   -691   -518   -748   -641   -489   -154    289   -578   -550   -540   -743   -392    313   -658    -35   -217   -567   -605 
  -951   -872   -938  -1001   -947   -850   -911   -979    402   -952  -1012   -964   -956   -960   -801  -1056   -963  -1018   -802   -925 
  -567   -671   -691   -518   -746   -641    305   -591    162   -146   -550   -539   -743    273    197   -658   -557   -608   -566   -130 
  -593   -560   -909   -864    -59   -870   -940     61   -878   -214   -471   -866   -925   -888   -902   -909   -612    408   -748   -736 
  -606   -891   -454    375   -893   -719   -722   -764   -599   -767   -743   -687   -776    224   -714   -770   -697   -734   -793   -816 
  -408   -352   -525   -511   -517   -473   -311   -408    -96   -428   -433   -419   -502   -325    412   -375   -452   -518   -291   -463 
   180    262    -31   -429   -405   -492   -135   -274   -431     35   -319    -57   -602   -428   -457    181   -197   -165   -407   -120 
    35   -478     28   -274   -153   -217     54   -138   -164    159   -356   -100   -171   -284    107     97    -64     32   -413     23 
  -116   -494    194    235   -471   -424    194   -408    -24   -219   -369     59   -508     10    -97   -130    -64   -115   -420   -407 
  -546   -653    383   -204   -708    123   -480   -711   -523   -730   -721   -159   -693   -189   -594   -517   -521   -718   -660   -603 
  -334    -77   -487   -136   -531   -239     96   -460    -92     -6     48   -500    299    115   -214   -234   -218   -464   -521   -555 
    15    -68    -61    -93   -470    -44   -346    191    103   -416   -368    -51   -507   -274     15    109    139   -197   -419   -122 
    69     37   -638   -550   -132   -532   -503    241   -141   -169    333   -537   -623   -509   -516   -140    142    159   -362     67 
  -545   -536    -73     96    199   -699   -541   -347   -694    225   -392   -669   -779   -641   -665   -707   -558    280   -353    -11 
  -592   -556   -894     22   -600   -861   -948    425   -862    -81   -477   -850   -924   -886   -899   -895   -606    219   -766   -735 
   -15   -555   -911   -868   -619   -840   -967    283   -882   -455   -500   -861   -925   -904   -917   -873    288    232   -797   -755 
  -862   -828   -932   -997   -627   -834   -793   -893   -980   -858   -905   -925   -949   -930   -915   -964    387   -917   -619    240 
  -785   -682   -857   -846   -111   -820   -504   -629    102   -595   -628   -720   -889   -717   -736   -836   -233   -683   -305    489 
--------------------------------------------------------------------------------

--------------------------------------------------------------------------------
	Motif CPVRKQVERSSEDPSMVITTY MEME-2 position-specific probability matrix
--------------------------------------------------------------------------------
letter-probability matrix: alength= 20 w= 21 nsites= 87 E= 1.3e-1012 
 0.000000  1.000000  0.000000  0.000000  0.000000  0.000000  0.000000  0.000000  0.000000  0.000000  0.000000  0.000000  0.000000  0.000000  0.000000  0.000000  0.000000  0.000000  0.000000  0.000000 
 0.011494  0.000000  0.000000  0.022989  0.000000  0.103448  0.011494  0.011494  0.045977  0.034483  0.022989  0.045977  0.459770  0.034483  0.022989  0.091954  0.045977  0.011494  0.022989  0.000000 
 0.356322  0.000000  0.000000  0.000000  0.000000  0.000000  0.000000  0.000000  0.000000  0.000000  0.000000  0.000000  0.000000  0.000000  0.000000  0.000000  0.022989  0.620690  0.000000  0.000000 
 0.000000  0.000000  0.000000  0.000000  0.000000  0.000000  0.000000  0.011494  0.459770  0.000000  0.000000  0.000000  0.000000  0.000000  0.471264  0.000000  0.045977  0.011494  0.000000  0.000000 
 0.000000  0.000000  0.000000  0.000000  0.000000  0.000000  0.000000  0.000000  1.000000  0.000000  0.000000  0.000000  0.000000  0.000000  0.000000  0.000000  0.000000  0.000000  0.000000  0.000000 
 0.000000  0.000000  0.000000  0.000000  0.000000  0.000000  0.264368  0.000000  0.183908  0.022989  0.000000  0.000000  0.000000  0.310345  0.206897  0.000000  0.000000  0.000000  0.000000  0.011494 
 0.000000  0.000000  0.000000  0.000000  0.022989  0.000000  0.000000  0.045977  0.000000  0.011494  0.000000  0.000000  0.000000  0.000000  0.000000  0.000000  0.000000  0.919540  0.000000  0.000000 
 0.000000  0.000000  0.000000  0.781609  0.000000  0.000000  0.000000  0.000000  0.000000  0.000000  0.000000  0.000000  0.000000  0.218391  0.000000  0.000000  0.000000  0.000000  0.000000  0.000000 
 0.000000  0.000000  0.000000  0.000000  0.000000  0.000000  0.000000  0.000000  0.034483  0.000000  0.000000  0.000000  0.000000  0.000000  0.954023  0.011494  0.000000  0.000000  0.000000  0.000000 
 0.229885  0.114943  0.045977  0.000000  0.000000  0.000000  0.011494  0.000000  0.000000  0.080460  0.000000  0.034483  0.000000  0.000000  0.000000  0.448276  0.011494  0.011494  0.000000  0.011494 
 0.080460  0.000000  0.068966  0.000000  0.011494  0.011494  0.045977  0.011494  0.011494  0.206897  0.000000  0.022989  0.022989  0.000000  0.114943  0.252874  0.034483  0.068966  0.000000  0.034483 
 0.022989  0.000000  0.229885  0.310345  0.000000  0.000000  0.126437  0.000000  0.045977  0.011494  0.000000  0.080460  0.000000  0.045977  0.022989  0.045977  0.034483  0.022989  0.000000  0.000000 
 0.000000  0.000000  0.816092  0.011494  0.000000  0.149425  0.000000  0.000000  0.000000  0.000000  0.000000  0.011494  0.000000  0.011494  0.000000  0.000000  0.000000  0.000000  0.000000  0.000000 
 0.000000  0.011494  0.000000  0.022989  0.000000  0.011494  0.068966  0.000000  0.034483  0.068966  0.034483  0.000000  0.586207  0.114943  0.011494  0.022989  0.011494  0.000000  0.000000  0.000000 
 0.068966  0.011494  0.034483  0.022989  0.000000  0.045977  0.000000  0.137931  0.126437  0.000000  0.000000  0.034483  0.000000  0.000000  0.057471  0.275862  0.160920  0.011494  0.000000  0.011494 
 0.103448  0.022989  0.000000  0.000000  0.011494  0.000000  0.000000  0.183908  0.022989  0.011494  0.229885  0.000000  0.000000  0.000000  0.000000  0.045977  0.160920  0.160920  0.000000  0.045977 
 0.000000  0.000000  0.034483  0.114943  0.137931  0.000000  0.000000  0.000000  0.000000  0.310345  0.000000  0.000000  0.000000  0.000000  0.000000  0.000000  0.000000  0.379310  0.000000  0.022989 
 0.000000  0.000000  0.000000  0.068966  0.000000  0.000000  0.000000  0.655172  0.000000  0.034483  0.000000  0.000000  0.000000  0.000000  0.000000  0.000000  0.000000  0.241379  0.000000  0.000000 
 0.057471  0.000000  0.000000  0.000000  0.000000  0.000000  0.000000  0.241379  0.000000  0.000000  0.000000  0.000000  0.000000  0.000000  0.000000  0.000000  0.436782  0.264368  0.000000  0.000000 
 0.000000  0.000000  0.000000  0.000000  0.000000  0.000000  0.000000  0.000000  0.000000  0.000000  0.000000  0.000000  0.000000  0.000000  0.000000  0.000000  0.850575  0.000000  0.000000  0.149425 
 0.000000  0.000000  0.000000  0.000000  0.011494  0.000000  0.000000  0.000000  0.126437  0.000000  0.000000  0.000000  0.000000  0.000000  0.000000  0.000000  0.011494  0.000000  0.000000  0.850575 
--------------------------------------------------------------------------------

--------------------------------------------------------------------------------
	Motif CPVRKQVERSSEDPSMVITTY MEME-2 regular expression
--------------------------------------------------------------------------------
CP[VA][RK]K[QHR]V[EQ]R[SA][SL][ED]DPSM[VL][IV][TVI]TY
--------------------------------------------------------------------------------


Time 345.11 secs.

********************************************************************************


********************************************************************************
MOTIF KKVREPRFAFQTKSEVDILD MEME-3	width =  20  sites =  32  llr = 1228  E-value = 4.0e-271
********************************************************************************
--------------------------------------------------------------------------------
	Motif KKVREPRFAFQTKSEVDILD MEME-3 Description
--------------------------------------------------------------------------------
Simplified        A  :1:1::::5:::::::::::
pos.-specific     C  ::::::::1:::::::::::
probability       D  ::::::::::::::2:9::6
matrix            E  ::2:8:::::::1:6:1::3
                  F  :::::::5:6::::::::::
                  G  ::1:::::::::::::::::
                  H  :::::::::::::::::3::
                  I  ::2::::11::1:::2:4::
                  K  63:1::::::1:4:::::::
                  L  ::1:::::::1:1::::1a:
                  M  ::::::::::3:::::::::
                  N  ::::::::::::::::::::
                  P  :1:::7::::::::::::::
                  Q  ::1111::::5:::1:::::
                  R  43:6:1a:::::1:::::::
                  S  :1:::1:::::::9::::::
                  T  :21::::::::921::::::
                  V  ::31:::434:::::7:1::
                  W  ::::::::::::::::::::
                  Y  :::::::1::::::::::::

         bits    7.0                     
                 6.3                     
                 5.6                     
                 4.9                     
Relative         4.2       *             
Entropy          3.5       *  * *    * * 
(55.3 bits)      2.8 *   * ** *** *******
                 2.1 *  ********* *******
                 1.4 ********************
                 0.7 ********************
                 0.0 --------------------

Multilevel           KKVREPRFAFQTKSEVDILD
consensus            RR     VVVM   DI H E
sequence                                 
                                         
                                         
--------------------------------------------------------------------------------

--------------------------------------------------------------------------------
	Motif KKVREPRFAFQTKSEVDILD MEME-3 sites sorted by position p-value
--------------------------------------------------------------------------------
Sequence name             Start   P-value                    Site      
-------------             ----- ---------            --------------------
Cp4.1LG12g03320.1           113  5.25e-25 KQLKAKKKNQ KRVREPRFAFMTKSEVDHLD DGYRWRKYGQ
Cp4.1LG10g05720.1           100  9.25e-23 TAAKSKKKVE KKEREPRVAFMTKSEVDHLE DGYRWRKYGQ
Cp4.1LG11g03940.1           136  3.39e-22 CRQKVKKKGQ KRIRQPRFAFMTKSEVDHLE DGYRWRKYGQ
Cp4.1LG07g00870.1            25  3.39e-22 RRNKVKKKGQ KRIRQPRFAFMTKSEVDHLE DGYRWRKYGQ
Cp4.1LG03g11900.1           126  9.63e-22 NVLKPKKKNP KKQREPRFAFMTKSDIDHLD DGYRWRKYGQ
Cp4.1LG14g08130.1           475  6.29e-21 AYVTEMSGAT RAIREPRVVVQTTSEVDILD DGYRWRKYGQ
Cp4.1LG08g08130.1           518  6.29e-21 AYVTEMSGAT RAIREPRVVVQTTSEVDILD DGYRWRKYGQ
Cp4.1LG15g08740.1           137  8.08e-21 KQNNISKKKE KRQREPRFAFLTKSEIDHLE DGYRWRKYGQ
Cp4.1LG12g06240.1           112  2.40e-20 QLKTKKMTRK KKDQEPRFAFMTKSEVDHLE DGYRWRKYGQ
Cp4.1LG08g08540.1           379  2.40e-20 LGGFDVCPMV KPIREPRVVVQTLSEVDILD DGYRWRKYGQ
Cp4.1LG03g15600.1           122  2.71e-20 NADKSKVKVR RKLREPRFCFQTRSDVDVLD DGYKWRKYGQ
Cp4.1LG14g07630.1           359  3.04e-20 LGGFEACPMV RPIREPRVVVQTLSEVDILD DGSYYKCTNV
Cp4.1LG08g05270.1           145  3.41e-20 SKMLKPKKNQ KKQRERRFAFMTKSDIDHLD DGYRWRKYGQ
Cp4.1LG02g11140.1           355  4.30e-20 NNEGISAAGN RTVREPRVVVQTTSDIDILD DGYRWRKYGQ
Cp4.1LG03g05140.1           139  1.17e-19 KKKVKKKKKE KREKEGRFAFMTKSEVDHLE DGYRWRKYGQ
Cp4.1LG04g02450.1            87  2.01e-19 FIRNAAQKKE KREREPRFAFLTKSEIDQLE DGYRWRKYGQ
Cp4.1LG03g06840.1            74  6.95e-19 CGGSGNKKGE KKVRKPRYAFQTRSQVDILD DGYRWRKYGQ
Cp4.1LG10g03040.1           124  9.39e-19 TVKMKRMKGR RKVREPRFCFKTMTDVDVLD DGYKWRKYGQ
Cp4.1LG16g00060.1           125  4.01e-18 TMKMKKIKGR RRVREPRFSFKTLSDVDVLD DGYKWRKYGQ
Cp4.1LG03g03290.1           299  2.08e-17 ENEGFSGGGS RTVKEPRIVVQTTSEIDILP DGYRWRKYGQ
Cp4.1LG18g02530.1           465  3.52e-17 GGSIETNLAS RSLREPRVVVQIETDVDILE DGYRWRKYGQ
Cp4.1LG16g07300.1           112  1.07e-16 VKLDGRKKKE KREKGPRFAFLTKSEIDNLE DGYRWRKYGQ
Cp4.1LG05g09980.1           447  1.07e-16 ENEIISVAGG KTVREQRVVVQTISRVDKLD DGYWWRKYGQ
Cp4.1LG17g07650.1            19  1.49e-16 MSKTKKTNQK KKEQEQRYTFMTKSKVDHLE DGYRWRKYGQ
Cp4.1LG00g01540.1           271  5.94e-16 GISMETSLGS RSVREQRVVVQIETEFDILE DGYRWRKYGQ
Cp4.1LG01g12160.1           360  6.96e-16 VRLSEPASSH RTLAESRIIVQTTSEVDLLD DGYRWRKYGQ
Cp4.1LG03g12920.1            70  9.54e-16 AAGRGGYEQK KKTLSRRFCFQTRSQVDILD DGYKWRKYGQ
Cp4.1LG09g02180.1           360  1.11e-15 EARVEPVSSH RTLTESRIIVQTTSEVDLLD DGYRWRKYGQ
Cp4.1LG01g00130.1            86  6.37e-15 GKNKGKMAMG KRGAIPRVAFQTRSAEDVLD DGYRWRKYGQ
Cp4.1LG04g03970.1           264  4.74e-14 ICNIDVTVAD KSTVESRVVVQTPSEVDIVN DGYRWRKYGQ
Cp4.1LG07g05980.1            67  2.27e-13 LARNTIHQGE PSSVRERFAFKTKSEVEILD DGFKWRKYGK
Cp4.1LG19g11800.1            74  2.87e-11 RRGVKRKQKG RGGGCHKVAFRTKSELEILQ DGFKWRKYGK
--------------------------------------------------------------------------------

--------------------------------------------------------------------------------
	Motif KKVREPRFAFQTKSEVDILD MEME-3 block diagrams
--------------------------------------------------------------------------------
SEQUENCE NAME            POSITION P-VALUE  MOTIF DIAGRAM
-------------            ----------------  -------------
Cp4.1LG12g03320.1                 5.3e-25  112_[3]_141
Cp4.1LG10g05720.1                 9.3e-23  99_[3]_147
Cp4.1LG11g03940.1                 3.4e-22  135_[3]_159
Cp4.1LG07g00870.1                 3.4e-22  24_[3]_140
Cp4.1LG03g11900.1                 9.6e-22  125_[3]_157
Cp4.1LG14g08130.1                 6.3e-21  474_[3]_206
Cp4.1LG08g08130.1                 6.3e-21  517_[3]_203
Cp4.1LG15g08740.1                 8.1e-21  136_[3]_135
Cp4.1LG12g06240.1                 2.4e-20  111_[3]_162
Cp4.1LG08g08540.1                 2.4e-20  378_[3]_180
Cp4.1LG03g15600.1                 2.7e-20  121_[3]_73
Cp4.1LG14g07630.1                   3e-20  358_[3]_155
Cp4.1LG08g05270.1                 3.4e-20  144_[3]_159
Cp4.1LG02g11140.1                 4.3e-20  354_[3]_176
Cp4.1LG03g05140.1                 1.2e-19  138_[3]_42
Cp4.1LG04g02450.1                   2e-19  86_[3]_135
Cp4.1LG03g06840.1                 6.9e-19  73_[3]_79
Cp4.1LG10g03040.1                 9.4e-19  123_[3]_76
Cp4.1LG16g00060.1                   4e-18  124_[3]_76
Cp4.1LG03g03290.1                 2.1e-17  298_[3]_157
Cp4.1LG18g02530.1                 3.5e-17  464_[3]_290
Cp4.1LG16g07300.1                 1.1e-16  111_[3]_118
Cp4.1LG05g09980.1                 1.1e-16  446_[3]_109
Cp4.1LG17g07650.1                 1.5e-16  18_[3]_111
Cp4.1LG00g01540.1                 5.9e-16  270_[3]_208
Cp4.1LG01g12160.1                   7e-16  359_[3]_107
Cp4.1LG03g12920.1                 9.5e-16  69_[3]_78
Cp4.1LG09g02180.1                 1.1e-15  359_[3]_71
Cp4.1LG01g00130.1                 6.4e-15  85_[3]_78
Cp4.1LG04g03970.1                 4.7e-14  263_[3]_142
Cp4.1LG07g05980.1                 2.3e-13  66_[3]_59
Cp4.1LG19g11800.1                 2.9e-11  73_[3]_86
--------------------------------------------------------------------------------

--------------------------------------------------------------------------------
	Motif KKVREPRFAFQTKSEVDILD MEME-3 in BLOCKS format
--------------------------------------------------------------------------------
BL   MOTIF KKVREPRFAFQTKSEVDILD width=20 seqs=32
Cp4.1LG12g03320.1        (  113) KRVREPRFAFMTKSEVDHLD  1 
Cp4.1LG10g05720.1        (  100) KKEREPRVAFMTKSEVDHLE  1 
Cp4.1LG11g03940.1        (  136) KRIRQPRFAFMTKSEVDHLE  1 
Cp4.1LG07g00870.1        (   25) KRIRQPRFAFMTKSEVDHLE  1 
Cp4.1LG03g11900.1        (  126) KKQREPRFAFMTKSDIDHLD  1 
Cp4.1LG14g08130.1        (  475) RAIREPRVVVQTTSEVDILD  1 
Cp4.1LG08g08130.1        (  518) RAIREPRVVVQTTSEVDILD  1 
Cp4.1LG15g08740.1        (  137) KRQREPRFAFLTKSEIDHLE  1 
Cp4.1LG12g06240.1        (  112) KKDQEPRFAFMTKSEVDHLE  1 
Cp4.1LG08g08540.1        (  379) KPIREPRVVVQTLSEVDILD  1 
Cp4.1LG03g15600.1        (  122) RKLREPRFCFQTRSDVDVLD  1 
Cp4.1LG14g07630.1        (  359) RPIREPRVVVQTLSEVDILD  1 
Cp4.1LG08g05270.1        (  145) KKQRERRFAFMTKSDIDHLD  1 
Cp4.1LG02g11140.1        (  355) RTVREPRVVVQTTSDIDILD  1 
Cp4.1LG03g05140.1        (  139) KREKEGRFAFMTKSEVDHLE  1 
Cp4.1LG04g02450.1        (   87) KREREPRFAFLTKSEIDQLE  1 
Cp4.1LG03g06840.1        (   74) KKVRKPRYAFQTRSQVDILD  1 
Cp4.1LG10g03040.1        (  124) RKVREPRFCFKTMTDVDVLD  1 
Cp4.1LG16g00060.1        (  125) RRVREPRFSFKTLSDVDVLD  1 
Cp4.1LG03g03290.1        (  299) RTVKEPRIVVQTTSEIDILP  1 
Cp4.1LG18g02530.1        (  465) RSLREPRVVVQIETDVDILE  1 
Cp4.1LG16g07300.1        (  112) KREKGPRFAFLTKSEIDNLE  1 
Cp4.1LG05g09980.1        (  447) KTVREQRVVVQTISRVDKLD  1 
Cp4.1LG17g07650.1        (   19) KKEQEQRYTFMTKSKVDHLE  1 
Cp4.1LG00g01540.1        (  271) RSVREQRVVVQIETEFDILE  1 
Cp4.1LG01g12160.1        (  360) RTLAESRIIVQTTSEVDLLD  1 
Cp4.1LG03g12920.1        (   70) KKTLSRRFCFQTRSQVDILD  1 
Cp4.1LG09g02180.1        (  360) RTLTESRIIVQTTSEVDLLD  1 
Cp4.1LG01g00130.1        (   86) KRGAIPRVAFQTRSAEDVLD  1 
Cp4.1LG04g03970.1        (  264) KSTVESRVVVQTPSEVDIVN  1 
Cp4.1LG07g05980.1        (   67) PSSVRERFAFKTKSEVEILD  1 
Cp4.1LG19g11800.1        (   74) RGGGCHKVAFRTKSELEILQ  1 
//

--------------------------------------------------------------------------------

--------------------------------------------------------------------------------
	Motif KKVREPRFAFQTKSEVDILD MEME-3 position-specific scoring matrix
--------------------------------------------------------------------------------
log-odds matrix: alength= 20 w= 20 n= 24842 bayes= 10.3363 E= 4.0e-271 
  -435   -538   -557   -386   -616   -509   -358   -460    314   -447   -419   -408   -136   -261    288   -526   -426   -477   -435   -474 
     3   -417   -308   -223   -430    -95   -282   -352    211   -357   -314   -274    -42   -205    228     -4    130   -354   -356   -355 
  -216   -274    -84    128   -252    -11   -309    233   -265     93   -163   -310   -450     91   -293   -173     13    209   -252   -270 
   -42   -380   -423   -331   -478   -137   -290   -368     49   -135   -358   -344   -490     13    364   -439   -119    -27   -311   -403 
  -252     49   -244    357   -422   -109   -284    -33    -52   -355   -310   -268   -449     39    -56   -180   -280   -348   -358   -353 
  -226   -395   -387   -112   -426   -128    -40   -355   -345   -359   -379   -404    317     59    -17    -73   -325   -358   -421   -462 
  -354   -298   -472   -458   -463   -419   -258   -355   -107   -375   -379   -365   -449   -272    410   -470   -399   -465   -238   -410 
  -509   -463   -738   -702    370   -687   -459    153   -685   -308   -349   -629   -752   -623   -648   -708   -518    277   -260    125 
   286    226   -576   -515   -369   -365   -505     91   -519   -298   -282   -496   -564   -489   -496   -174    -79    243   -374   -417 
  -541   -508   -775   -766    413   -693   -563   -215   -757   -342   -390   -706   -783   -700   -720   -755   -568    279   -364   -284 
  -427   -530   -549   -379   -596   -504   -352   -444     87     46    356   -402   -605    335    -14   -519   -418   -464   -428   -466 
  -390   -401   -570   -588   -500   -545   -560     81   -530   -432   -382   -430   -630   -509   -526   -331    395   -303   -477   -548 
  -259   -409   -313     19   -401   -371   -277    -15    269     43     44   -277   -135   -200    122   -354    154   -321   -338   -341 
  -227   -272   -443   -477   -428   -376   -454   -394   -415   -434   -374   -302   -483   -439   -401    277     89   -425   -382   -419 
   -91   -762    191    340   -693   -486   -470   -505    -85   -516   -479   -426   -530     49    -81   -509   -436   -472   -627   -588 
  -191   -253   -471   -136    -59   -473   -432    232   -450    -95   -243   -473   -500   -458   -414   -496   -260    370   -384   -450 
  -332   -389    397    -38   -418   -383   -321   -359   -416   -414   -389   -132   -546   -380   -410   -428   -400   -384   -337   -375 
  -241   -257   -492   -399   -235   -406    313    343    -90     20   -148    -80   -498    -57   -333   -408   -257    126   -245   -273 
  -467   -439   -681   -589   -260   -637   -564   -149   -585    384   -142   -627   -638   -506   -536   -657   -477    -62   -362   -434 
  -348   -718    321    261   -682   -461   -454   -514   -338   -526   -490    -71   -135    -36   -461   -491   -431   -483   -621   -575 
--------------------------------------------------------------------------------

--------------------------------------------------------------------------------
	Motif KKVREPRFAFQTKSEVDILD MEME-3 position-specific probability matrix
--------------------------------------------------------------------------------
letter-probability matrix: alength= 20 w= 20 nsites= 32 E= 4.0e-271 
 0.000000  0.000000  0.000000  0.000000  0.000000  0.000000  0.000000  0.000000  0.562500  0.000000  0.000000  0.000000  0.031250  0.000000  0.406250  0.000000  0.000000  0.000000  0.000000  0.000000 
 0.062500  0.000000  0.000000  0.000000  0.000000  0.031250  0.000000  0.000000  0.281250  0.000000  0.000000  0.000000  0.062500  0.000000  0.281250  0.125000  0.156250  0.000000  0.000000  0.000000 
 0.000000  0.000000  0.031250  0.156250  0.000000  0.062500  0.000000  0.187500  0.000000  0.125000  0.000000  0.000000  0.000000  0.093750  0.000000  0.031250  0.062500  0.250000  0.000000  0.000000 
 0.062500  0.000000  0.000000  0.000000  0.000000  0.031250  0.000000  0.000000  0.093750  0.031250  0.000000  0.000000  0.000000  0.062500  0.625000  0.000000  0.031250  0.062500  0.000000  0.000000 
 0.000000  0.031250  0.000000  0.750000  0.000000  0.031250  0.000000  0.031250  0.031250  0.000000  0.000000  0.000000  0.000000  0.062500  0.031250  0.031250  0.000000  0.000000  0.000000  0.000000 
 0.000000  0.000000  0.000000  0.031250  0.000000  0.031250  0.031250  0.000000  0.000000  0.000000  0.000000  0.000000  0.656250  0.093750  0.062500  0.093750  0.000000  0.000000  0.000000  0.000000 
 0.000000  0.000000  0.000000  0.000000  0.000000  0.000000  0.000000  0.000000  0.031250  0.000000  0.000000  0.000000  0.000000  0.000000  0.968750  0.000000  0.000000  0.000000  0.000000  0.000000 
 0.000000  0.000000  0.000000  0.000000  0.468750  0.000000  0.000000  0.093750  0.000000  0.000000  0.000000  0.000000  0.000000  0.000000  0.000000  0.000000  0.000000  0.375000  0.000000  0.062500 
 0.468750  0.093750  0.000000  0.000000  0.000000  0.000000  0.000000  0.062500  0.000000  0.000000  0.000000  0.000000  0.000000  0.000000  0.000000  0.031250  0.031250  0.312500  0.000000  0.000000 
 0.000000  0.000000  0.000000  0.000000  0.625000  0.000000  0.000000  0.000000  0.000000  0.000000  0.000000  0.000000  0.000000  0.000000  0.000000  0.000000  0.000000  0.375000  0.000000  0.000000 
 0.000000  0.000000  0.000000  0.000000  0.000000  0.000000  0.000000  0.000000  0.093750  0.093750  0.281250  0.000000  0.000000  0.500000  0.031250  0.000000  0.000000  0.000000  0.000000  0.000000 
 0.000000  0.000000  0.000000  0.000000  0.000000  0.000000  0.000000  0.062500  0.000000  0.000000  0.000000  0.000000  0.000000  0.000000  0.000000  0.000000  0.937500  0.000000  0.000000  0.000000 
 0.000000  0.000000  0.000000  0.062500  0.000000  0.000000  0.000000  0.031250  0.437500  0.093750  0.031250  0.000000  0.031250  0.000000  0.125000  0.000000  0.187500  0.000000  0.000000  0.000000 
 0.000000  0.000000  0.000000  0.000000  0.000000  0.000000  0.000000  0.000000  0.000000  0.000000  0.000000  0.000000  0.000000  0.000000  0.000000  0.906250  0.093750  0.000000  0.000000  0.000000 
 0.031250  0.000000  0.218750  0.625000  0.000000  0.000000  0.000000  0.000000  0.031250  0.000000  0.000000  0.000000  0.000000  0.062500  0.031250  0.000000  0.000000  0.000000  0.000000  0.000000 
 0.000000  0.000000  0.000000  0.031250  0.031250  0.000000  0.000000  0.218750  0.000000  0.031250  0.000000  0.000000  0.000000  0.000000  0.000000  0.000000  0.000000  0.687500  0.000000  0.000000 
 0.000000  0.000000  0.937500  0.062500  0.000000  0.000000  0.000000  0.000000  0.000000  0.000000  0.000000  0.000000  0.000000  0.000000  0.000000  0.000000  0.000000  0.000000  0.000000  0.000000 
 0.000000  0.000000  0.000000  0.000000  0.000000  0.000000  0.312500  0.406250  0.031250  0.062500  0.000000  0.031250  0.000000  0.031250  0.000000  0.000000  0.000000  0.125000  0.000000  0.000000 
 0.000000  0.000000  0.000000  0.000000  0.000000  0.000000  0.000000  0.000000  0.000000  0.968750  0.000000  0.000000  0.000000  0.000000  0.000000  0.000000  0.000000  0.031250  0.000000  0.000000 
 0.000000  0.000000  0.562500  0.343750  0.000000  0.000000  0.000000  0.000000  0.000000  0.000000  0.000000  0.031250  0.031250  0.031250  0.000000  0.000000  0.000000  0.000000  0.000000  0.000000 
--------------------------------------------------------------------------------

--------------------------------------------------------------------------------
	Motif KKVREPRFAFQTKSEVDILD MEME-3 regular expression
--------------------------------------------------------------------------------
[KR][KR]VREPR[FV][AV][FV][QM]TKS[ED][VI]D[IH]L[DE]
--------------------------------------------------------------------------------


Time 438.81 secs.

********************************************************************************


********************************************************************************
MOTIF RCHCSKKRKNRVKRVIRVPAISSKJADIP MEME-4	width =  29  sites =  13  llr = 919  E-value = 5.3e-204
********************************************************************************
--------------------------------------------------------------------------------
	Motif RCHCSKKRKNRVKRVIRVPAISSKJADIP MEME-4 Description
--------------------------------------------------------------------------------
Simplified        A  ::::1:::::::::::::1a::1::a:::
pos.-specific     C  :9:9:::::::::::::::::::::::::
probability       D  ::::1:::::::::::::::::::::9::
matrix            E  1:::::::::::::::::::::::::1::
                  F  :::::1:::::1:::::::::::::::::
                  G  ::::::::::2::::::::::::::::::
                  H  ::9::::::2:::::::::::::::::::
                  I  :::1:::::::1:::5:1::8:::3::a:
                  K  3::::87:a:::a3::2::::::a:::::
                  L  1::::::::1:1::::::::::2:4::::
                  M  :::::::::2:2:::::1::::::1::::
                  N  :1:::1:::3::::::::::::2:2::::
                  P  ::::::::::::::::::9:::::::::a
                  Q  ::::::::::::::::1::::::::::::
                  R  5:::::2a::8::7::7::::::::::::
                  S  ::1:8:1::2::::2::::::a5::::::
                  T  ::::::::::::::3:::::::::1::::
                  V  :::::::::1:5::55:8::2::::::::
                  W  :::::::::::::::::::::::::::::
                  Y  :::::::::::::::::::::::::::::

         bits    7.0                              
                 6.3                              
                 5.6  * *                         
                 4.9  * *                       * 
Relative         4.2  ***   **   *      **  * * * 
Entropy          3.5  *** * ** * ** * ****  * ****
(102.0 bits)     2.8 **** **** **** ******* * ****
                 2.1 *****************************
                 1.4 *****************************
                 0.7 *****************************
                 0.0 -----------------------------

Multilevel           RCHCSKKRKNRVKRVIRVPAISSKLADIP
consensus            K     R  H M KTVK     N I    
sequence                           S              
                                                  
                                                  
--------------------------------------------------------------------------------

--------------------------------------------------------------------------------
	Motif RCHCSKKRKNRVKRVIRVPAISSKJADIP MEME-4 sites sorted by position p-value
--------------------------------------------------------------------------------
Sequence name             Start   P-value                        Site           
-------------             ----- ---------            -----------------------------
Cp4.1LG05g11790.1           177  3.19e-34 SGKCGESSGG RCHCSKKRKMRFKRVVRVPAISSKNADIP PDDYSWRKYG
Cp4.1LG17g06230.1           243  3.64e-34 DGSVKCGSTG RCHCSKKRKHRVKRSIKVPAISNKLADIP PDDYSWRKYG
Cp4.1LG10g02340.1           213  3.64e-34 GKCGAASSSG RCHCSKKRKVRVKRVVRVPAISLKMADIP PDDYSWRKYG
Cp4.1LG16g01500.1           181  4.73e-34 SGKCSVSSGG RCHCSKKRKMRLKRVVRVPAISSKNADIP PDDYSWRKYG
Cp4.1LG06g01700.1           283  6.14e-34 SAMKCASSSG RCHCSKKRKNRIKRVIRVPAVSSKLADIP PDDYSWRKYG
Cp4.1LG02g06760.1           283  6.14e-34 SARKCGSSSG RCHCSKKRKNRMKRVIRVPAVSAKLADIP PDDYSWRKYG
Cp4.1LG02g04820.1           240  7.77e-34 KFSGSTSASG KCHCSKRRKNRMKKTIRVPAISSKIADIP PDEYSWRKYG
Cp4.1LG15g00430.1           214  8.82e-34 EGSLKCGSTG KCHCSKKRKHRVKRSIKVPAISNKLADIP SDDYSWRKYG
Cp4.1LG06g04620.1           235  1.36e-31 IISGSKSGSC KCHCSKRRKNRMKKTIQIPAISSKIADIP TDEFSWRKYG
Cp4.1LG05g01350.1           183  1.51e-31 EGSFQCGTTA KCHCSNKRKHRVKRSIKVPAISNKLADIP SDEYSWRKYG
Cp4.1LG19g11130.1           107  4.51e-31 PAVDLVSSSG RCHCSKKRKLRVKRVVRMAAISLKTADIP ADDYSWRKYG
Cp4.1LG04g13250.1           177  2.35e-28 SRFGCKINSK ECHCAKRRKSGVKKTVRVPAISSKIAEIP SDEYSWRKYG
Cp4.1LG18g06480.1             6  5.03e-21      MNSIF LNSIDFSRKSGVKKTVRVPAISSKIADIP PDEYSWRKYG
--------------------------------------------------------------------------------

--------------------------------------------------------------------------------
	Motif RCHCSKKRKNRVKRVIRVPAISSKJADIP MEME-4 block diagrams
--------------------------------------------------------------------------------
SEQUENCE NAME            POSITION P-VALUE  MOTIF DIAGRAM
-------------            ----------------  -------------
Cp4.1LG05g11790.1                 3.2e-34  176_[4]_73
Cp4.1LG17g06230.1                 3.6e-34  242_[4]_68
Cp4.1LG10g02340.1                 3.6e-34  212_[4]_73
Cp4.1LG16g01500.1                 4.7e-34  180_[4]_73
Cp4.1LG06g01700.1                 6.1e-34  282_[4]_73
Cp4.1LG02g06760.1                 6.1e-34  282_[4]_73
Cp4.1LG02g04820.1                 7.8e-34  239_[4]_78
Cp4.1LG15g00430.1                 8.8e-34  213_[4]_68
Cp4.1LG06g04620.1                 1.4e-31  234_[4]_78
Cp4.1LG05g01350.1                 1.5e-31  182_[4]_73
Cp4.1LG19g11130.1                 4.5e-31  106_[4]_67
Cp4.1LG04g13250.1                 2.3e-28  176_[4]_79
Cp4.1LG18g06480.1                   5e-21  5_[4]_75
--------------------------------------------------------------------------------

--------------------------------------------------------------------------------
	Motif RCHCSKKRKNRVKRVIRVPAISSKJADIP MEME-4 in BLOCKS format
--------------------------------------------------------------------------------
BL   MOTIF RCHCSKKRKNRVKRVIRVPAISSKJADIP width=29 seqs=13
Cp4.1LG05g11790.1        (  177) RCHCSKKRKMRFKRVVRVPAISSKNADIP  1 
Cp4.1LG17g06230.1        (  243) RCHCSKKRKHRVKRSIKVPAISNKLADIP  1 
Cp4.1LG10g02340.1        (  213) RCHCSKKRKVRVKRVVRVPAISLKMADIP  1 
Cp4.1LG16g01500.1        (  181) RCHCSKKRKMRLKRVVRVPAISSKNADIP  1 
Cp4.1LG06g01700.1        (  283) RCHCSKKRKNRIKRVIRVPAVSSKLADIP  1 
Cp4.1LG02g06760.1        (  283) RCHCSKKRKNRMKRVIRVPAVSAKLADIP  1 
Cp4.1LG02g04820.1        (  240) KCHCSKRRKNRMKKTIRVPAISSKIADIP  1 
Cp4.1LG15g00430.1        (  214) KCHCSKKRKHRVKRSIKVPAISNKLADIP  1 
Cp4.1LG06g04620.1        (  235) KCHCSKRRKNRMKKTIQIPAISSKIADIP  1 
Cp4.1LG05g01350.1        (  183) KCHCSNKRKHRVKRSIKVPAISNKLADIP  1 
Cp4.1LG19g11130.1        (  107) RCHCSKKRKLRVKRVVRMAAISLKTADIP  1 
Cp4.1LG04g13250.1        (  177) ECHCAKRRKSGVKKTVRVPAISSKIAEIP  1 
Cp4.1LG18g06480.1        (    6) LNSIDFSRKSGVKKTVRVPAISSKIADIP  1 
//

--------------------------------------------------------------------------------

--------------------------------------------------------------------------------
	Motif RCHCSKKRKNRVKRVIRVPAISSKJADIP MEME-4 position-specific scoring matrix
--------------------------------------------------------------------------------
log-odds matrix: alength= 20 w= 29 n= 24149 bayes= 11.3892 E= 5.3e-204 
  -307   -412   -413     29   -485   -385   -237   -336    229      7   -297   -284   -483   -143    319   -399   -301   -354   -312   -351 
  -354    575   -533   -482   -450   -522   -502   -345   -542   -429   -376   -332   -602   -519   -482   -540   -392   -438   -459   -511 
  -323   -301   -289   -325   -236   -367    471   -359   -390   -302   -263   -142   -443   -105   -211   -134   -300   -353   -186    -71 
  -354    575   -534   -481   -449   -524   -502   -244   -542   -425   -373   -509   -602   -518   -482   -541   -391   -430   -459   -510 
    -8   -198    -35   -343   -357   -276   -350   -323   -324   -361   -303   -193   -403   -340   -321    262     26   -344   -312   -341 
  -331   -354   -457   -402   -167   -438   -385   -322    386   -415   -364   -189   -504   -368    -49   -495   -372   -425   -317   -410 
  -324   -376   -452   -332   -499   -418   -310   -329    365   -375   -335   -326   -499   -236    129   -179   -342   -394   -320   -398 
  -370   -313   -481   -473   -472   -425   -275   -372   -180   -390   -397   -382   -461   -290    413   -485   -414   -479   -252   -421 
  -355   -373   -494   -436   -518   -460   -417   -345    391   -440   -390   -387   -523   -406    -72   -527   -399   -450   -341   -458 
  -122   -176   -253   -176   -153   -266    244    -23   -170     43    243    208   -356   -169   -195      3   -140     71   -154   -169 
  -362   -329   -480   -469   -486     34   -295   -390   -192   -407   -411   -386   -477   -302    402   -481   -415   -481   -274   -433 
  -286   -282   -575   -497    107   -489   -456    146   -491     76    319   -495   -553   -443   -464   -504   -307    318   -265   -318 
  -355   -373   -494   -436   -518   -460   -417   -345    391   -440   -390   -387   -523   -406    -72   -527   -399   -450   -341   -458 
  -326   -384   -444   -294   -489   -397   -245   -346    211   -340   -317   -304   -483   -165    362   -421   -325   -378   -297   -366 
  -130   -221   -471   -458   -374   -283   -450   -184   -445   -312   -277   -361   -463   -406   -426     79    243    287   -360   -414 
  -333   -302   -609   -573   -337   -585   -651    393   -574   -160   -207   -567   -651   -596   -607   -610   -345    300   -477   -455 
  -320   -350   -439   -305   -473   -391   -236   -336    155   -335   -317   -304   -464     35    371   -419   -326   -381   -270   -364 
  -139   -198   -421   -375   -277   -423   -385    134   -400   -160     92   -424   -449   -410   -366   -448   -208    384   -337   -401 
    -6   -320   -332   -294   -362   -323   -336   -291   -292   -296   -316   -351    346   -281   -309   -306   -259   -292   -355   -400 
   391   -285   -553   -535   -490   -333   -542   -426   -554   -460   -428   -516   -562   -524   -520   -354   -363   -336   -429   -519 
  -299   -296   -461   -440   -263   -476   -491    442   -420    -46    -96   -428   -550   -443   -449   -476   -293    158   -325   -328 
  -344   -407   -558   -610   -558   -445   -566   -556   -584   -571   -550   -482   -589   -576   -553    299   -271   -538   -476   -544 
    41   -233   -265   -298   -372   -247   -327   -294   -304     94   -302    185   -423   -304   -328    204   -125   -284   -341   -357 
  -355   -373   -494   -436   -518   -460   -417   -345    391   -440   -390   -387   -523   -406    -72   -527   -399   -450   -341   -458 
  -175   -182   -442   -355   -135   -346   -314    292   -341    247    168    110   -430   -311   -321   -349     25    -41   -166   -201 
   391   -285   -553   -535   -490   -333   -542   -426   -554   -460   -428   -516   -562   -524   -520   -354   -363   -336   -429   -519 
  -302   -360    395    -44   -389   -354   -292   -330   -385   -385   -359   -102   -517   -349   -381   -398   -370   -354   -308   -345 
  -430   -409   -602   -605   -385   -554   -602    478   -591   -211   -261   -588   -647   -594   -592   -630   -441    -95   -440   -462 
  -352   -478   -498   -481   -522   -469   -498   -477   -478   -473   -503   -525    366   -465   -483   -498   -447   -481   -469   -542 
--------------------------------------------------------------------------------

--------------------------------------------------------------------------------
	Motif RCHCSKKRKNRVKRVIRVPAISSKJADIP MEME-4 position-specific probability matrix
--------------------------------------------------------------------------------
letter-probability matrix: alength= 20 w= 29 nsites= 13 E= 5.3e-204 
 0.000000  0.000000  0.000000  0.076923  0.000000  0.000000  0.000000  0.000000  0.307692  0.076923  0.000000  0.000000  0.000000  0.000000  0.538462  0.000000  0.000000  0.000000  0.000000  0.000000 
 0.000000  0.923077  0.000000  0.000000  0.000000  0.000000  0.000000  0.000000  0.000000  0.000000  0.000000  0.076923  0.000000  0.000000  0.000000  0.000000  0.000000  0.000000  0.000000  0.000000 
 0.000000  0.000000  0.000000  0.000000  0.000000  0.000000  0.923077  0.000000  0.000000  0.000000  0.000000  0.000000  0.000000  0.000000  0.000000  0.076923  0.000000  0.000000  0.000000  0.000000 
 0.000000  0.923077  0.000000  0.000000  0.000000  0.000000  0.000000  0.076923  0.000000  0.000000  0.000000  0.000000  0.000000  0.000000  0.000000  0.000000  0.000000  0.000000  0.000000  0.000000 
 0.076923  0.000000  0.076923  0.000000  0.000000  0.000000  0.000000  0.000000  0.000000  0.000000  0.000000  0.000000  0.000000  0.000000  0.000000  0.846154  0.000000  0.000000  0.000000  0.000000 
 0.000000  0.000000  0.000000  0.000000  0.076923  0.000000  0.000000  0.000000  0.846154  0.000000  0.000000  0.076923  0.000000  0.000000  0.000000  0.000000  0.000000  0.000000  0.000000  0.000000 
 0.000000  0.000000  0.000000  0.000000  0.000000  0.000000  0.000000  0.000000  0.692308  0.000000  0.000000  0.000000  0.000000  0.000000  0.230769  0.076923  0.000000  0.000000  0.000000  0.000000 
 0.000000  0.000000  0.000000  0.000000  0.000000  0.000000  0.000000  0.000000  0.000000  0.000000  0.000000  0.000000  0.000000  0.000000  1.000000  0.000000  0.000000  0.000000  0.000000  0.000000 
 0.000000  0.000000  0.000000  0.000000  0.000000  0.000000  0.000000  0.000000  1.000000  0.000000  0.000000  0.000000  0.000000  0.000000  0.000000  0.000000  0.000000  0.000000  0.000000  0.000000 
 0.000000  0.000000  0.000000  0.000000  0.000000  0.000000  0.230769  0.000000  0.000000  0.076923  0.153846  0.307692  0.000000  0.000000  0.000000  0.153846  0.000000  0.076923  0.000000  0.000000 
 0.000000  0.000000  0.000000  0.000000  0.000000  0.153846  0.000000  0.000000  0.000000  0.000000  0.000000  0.000000  0.000000  0.000000  0.846154  0.000000  0.000000  0.000000  0.000000  0.000000 
 0.000000  0.000000  0.000000  0.000000  0.076923  0.000000  0.000000  0.076923  0.000000  0.076923  0.230769  0.000000  0.000000  0.000000  0.000000  0.000000  0.000000  0.538462  0.000000  0.000000 
 0.000000  0.000000  0.000000  0.000000  0.000000  0.000000  0.000000  0.000000  1.000000  0.000000  0.000000  0.000000  0.000000  0.000000  0.000000  0.000000  0.000000  0.000000  0.000000  0.000000 
 0.000000  0.000000  0.000000  0.000000  0.000000  0.000000  0.000000  0.000000  0.307692  0.000000  0.000000  0.000000  0.000000  0.000000  0.692308  0.000000  0.000000  0.000000  0.000000  0.000000 
 0.000000  0.000000  0.000000  0.000000  0.000000  0.000000  0.000000  0.000000  0.000000  0.000000  0.000000  0.000000  0.000000  0.000000  0.000000  0.230769  0.307692  0.461538  0.000000  0.000000 
 0.000000  0.000000  0.000000  0.000000  0.000000  0.000000  0.000000  0.538462  0.000000  0.000000  0.000000  0.000000  0.000000  0.000000  0.000000  0.000000  0.000000  0.461538  0.000000  0.000000 
 0.000000  0.000000  0.000000  0.000000  0.000000  0.000000  0.000000  0.000000  0.230769  0.000000  0.000000  0.000000  0.000000  0.076923  0.692308  0.000000  0.000000  0.000000  0.000000  0.000000 
 0.000000  0.000000  0.000000  0.000000  0.000000  0.000000  0.000000  0.076923  0.000000  0.000000  0.076923  0.000000  0.000000  0.000000  0.000000  0.000000  0.000000  0.846154  0.000000  0.000000 
 0.076923  0.000000  0.000000  0.000000  0.000000  0.000000  0.000000  0.000000  0.000000  0.000000  0.000000  0.000000  0.923077  0.000000  0.000000  0.000000  0.000000  0.000000  0.000000  0.000000 
 1.000000  0.000000  0.000000  0.000000  0.000000  0.000000  0.000000  0.000000  0.000000  0.000000  0.000000  0.000000  0.000000  0.000000  0.000000  0.000000  0.000000  0.000000  0.000000  0.000000 
 0.000000  0.000000  0.000000  0.000000  0.000000  0.000000  0.000000  0.846154  0.000000  0.000000  0.000000  0.000000  0.000000  0.000000  0.000000  0.000000  0.000000  0.153846  0.000000  0.000000 
 0.000000  0.000000  0.000000  0.000000  0.000000  0.000000  0.000000  0.000000  0.000000  0.000000  0.000000  0.000000  0.000000  0.000000  0.000000  1.000000  0.000000  0.000000  0.000000  0.000000 
 0.076923  0.000000  0.000000  0.000000  0.000000  0.000000  0.000000  0.000000  0.000000  0.153846  0.000000  0.230769  0.000000  0.000000  0.000000  0.538462  0.000000  0.000000  0.000000  0.000000 
 0.000000  0.000000  0.000000  0.000000  0.000000  0.000000  0.000000  0.000000  1.000000  0.000000  0.000000  0.000000  0.000000  0.000000  0.000000  0.000000  0.000000  0.000000  0.000000  0.000000 
 0.000000  0.000000  0.000000  0.000000  0.000000  0.000000  0.000000  0.307692  0.000000  0.384615  0.076923  0.153846  0.000000  0.000000  0.000000  0.000000  0.076923  0.000000  0.000000  0.000000 
 1.000000  0.000000  0.000000  0.000000  0.000000  0.000000  0.000000  0.000000  0.000000  0.000000  0.000000  0.000000  0.000000  0.000000  0.000000  0.000000  0.000000  0.000000  0.000000  0.000000 
 0.000000  0.000000  0.923077  0.076923  0.000000  0.000000  0.000000  0.000000  0.000000  0.000000  0.000000  0.000000  0.000000  0.000000  0.000000  0.000000  0.000000  0.000000  0.000000  0.000000 
 0.000000  0.000000  0.000000  0.000000  0.000000  0.000000  0.000000  1.000000  0.000000  0.000000  0.000000  0.000000  0.000000  0.000000  0.000000  0.000000  0.000000  0.000000  0.000000  0.000000 
 0.000000  0.000000  0.000000  0.000000  0.000000  0.000000  0.000000  0.000000  0.000000  0.000000  0.000000  0.000000  1.000000  0.000000  0.000000  0.000000  0.000000  0.000000  0.000000  0.000000 
--------------------------------------------------------------------------------

--------------------------------------------------------------------------------
	Motif RCHCSKKRKNRVKRVIRVPAISSKJADIP MEME-4 regular expression
--------------------------------------------------------------------------------
[RK]CHCSK[KR]RK[NH]R[VM]K[RK][VTS][IV][RK]VPAIS[SN]K[LI]ADIP
--------------------------------------------------------------------------------


Time 522.55 secs.

********************************************************************************


********************************************************************************
MOTIF EGEHNHPLPAARRSS MEME-5	width =  15  sites =  63  llr = 1256  E-value = 2.7e-202
********************************************************************************
--------------------------------------------------------------------------------
	Motif EGEHNHPLPAARRSS MEME-5 Description
--------------------------------------------------------------------------------
Simplified        A  ::::::1::231:2:
pos.-specific     C  :::::::::::::::
probability       D  ::1:::1::::::::
matrix            E  8:3:::1:::::1::
                  F  :::::::::::::::
                  G  :9::::::::1::21
                  H  :::a:a1:::::::1
                  I  :::::::1:1:::::
                  K  ::2::::::::1:::
                  L  :::::::2::11::1
                  M  ::::::::::1:::1
                  N  ::1:7:::::::211
                  P  ::::::3:6111:::
                  Q  ::2:::11::1::::
                  R  ::::1::::::22::
                  S  ::::::11111:133
                  T  1:::1:11:2111:1
                  V  :::::::2:1:::::
                  W  :::::::::::::::
                  Y  :::::::::::::::

         bits    7.0                
                 6.3                
                 5.6                
                 4.9    * *         
Relative         4.2    * *         
Entropy          3.5    * *         
(28.8 bits)      2.8 ** ***         
                 2.1 ** ***  *      
                 1.4 ******  *      
                 0.7 ***************
                 0.0 ---------------

Multilevel           EGEHNHPXPAARRSS
consensus              K          A 
sequence                          G 
                                    
                                    
--------------------------------------------------------------------------------

--------------------------------------------------------------------------------
	Motif EGEHNHPLPAARRSS MEME-5 sites sorted by position p-value
--------------------------------------------------------------------------------
Sequence name             Start   P-value                 Site    
-------------             ----- ---------            ---------------
Cp4.1LG14g08130.1           545  1.45e-15 HDLKSVITTY EGKHNHDVPAARNSS HISSCTSSPV
Cp4.1LG08g08130.1           588  1.45e-15 HDLKSVITTY EGKHNHDVPAARNSS HINSSTSSPV
Cp4.1LG18g02530.1           535  2.01e-15 HDLKCVITTY EGKHNHEVPAARNGS QVNSSNGNSQ
Cp4.1LG15g08740.1           207  4.32e-14 QDPSVVITTY EGQHNHHCPATLRGH SAGIMSSPFY
Cp4.1LG14g07630.1           411  6.95e-14 HDPKAVITTY EGKHNHDVPTAKTSS HDAAGPLRTA
Cp4.1LG08g08540.1           449  6.95e-14 HDPKAVITTY EGKHNHDVPTAKTSS HEVQGSLTIA
Cp4.1LG10g05720.1           170  1.09e-13 EDPSIVITTY EGQHNHPIPATLRGN LSAVSGAFPP
Cp4.1LG03g03290.1           369  2.58e-13 NDMRAVITTY EGKHNHEVPAARGGG GSFYNAVNRP
Cp4.1LG00g01540.1           341  2.58e-13 HDLKCVITTY EGKHNHLVPAARNSS SSSSSSSSTA
Cp4.1LG05g09980.1           505  3.86e-13 HDLKAVITTY EGKHNHEIPAARGGG SRPVSNNHGN
Cp4.1LG19g07870.1           399  4.69e-13 EDTTILITTY EGNHNHPLPPAAMAM ASTTTAAASM
Cp4.1LG15g07340.1           332  4.69e-13 EDKTILITTY EGNHNHPLPPAAMAM ASTTSSAARM
Cp4.1LG10g09790.1           398  4.69e-13 EDRTILITTY EGNHNHPLPPAAMAM ASTTTAAATM
Cp4.1LG09g02180.1           412  1.19e-12 TDQKAVITTY EGKHNHDVPAGKISS HGTANSNVPR
Cp4.1LG01g12160.1           430  1.19e-12 TDPKAVITTY EGKHNHDVPAGKISS HRSVNSNVPQ
Cp4.1LG20g01990.1           203  1.42e-12 DDMSILITTY EGNHNHPLPASATAM ASTTSAAASM
Cp4.1LG16g07300.1           182  1.42e-12 EDPCFVVTTY EGKHNHYCPITLRGH NVAGVYPPSA
Cp4.1LG17g00040.1            61  2.81e-12 HDPSVVVTTY EGQHNHQSPILPRGS LSASISTSAA
Cp4.1LG02g11140.1           425  3.31e-12 HDLRAVITTY EGKHNHEVPPARGSG SHSLSRPFPS
Cp4.1LG04g02450.1           157  4.57e-12 QDPSLVITTY EGQHIHHCPATLRGH SSPFYASAST
Cp4.1LG01g01970.1           290  1.14e-11 EDMSILITTY EGTHNHPLPVGATAM ASTASAAASF
Cp4.1LG08g05270.1           215  1.76e-11 SDHSIVITTY EGQHTHQSPVMPRGS IRILSESTNC
Cp4.1LG03g11900.1           196  2.03e-11 NDHSTVVTTY EGKHTHQSPIMPRGS IRILPESNLD
Cp4.1LG17g07650.1            89  6.80e-11 KDPSIVITTY EGQHTHSTPVMTRST FFPPPISTSL
Cp4.1LG02g15110.1           212  8.78e-11 EDQSILVATY EGEHNHPQSSLMEAT SGTAAARCVG
Cp4.1LG13g02760.1           230  1.84e-10 ADPESFIITY TGEHIHPRPTHRNCL AGSSRNRPLS
Cp4.1LG12g03320.1           183  1.84e-10 DDPSVVVTTY EGQHIHQSPIMPRGA LSVAAAAAAF
Cp4.1LG05g06330.1           221  2.63e-10 ADPETFIVTY TGDHTHPRPTHRNSL AGSSRNRSSS
Cp4.1LG12g06240.1           182  2.95e-10 KDPSIVVTTY EGQHTHSSPNMTRST FFPPPISTAL
Cp4.1LG15g00430.1           295  3.32e-10 EDPSMLIVTY EGEHNHPKMSTQSAH T         
Cp4.1LG09g07110.1           242  3.32e-10 TDPNMLVITY TSEHNHPWPTQRNAL AGSTRSHPSR
Cp4.1LG16g01500.1           262  4.67e-10 DDPTMLIVTY EGDHNHSQSVAEASS LILESW    
Cp4.1LG05g11790.1           258  4.67e-10 DDPSMLIVTY EGDHNHSQSVAEASS LILESW    
Cp4.1LG19g11130.1           183  5.22e-10 DDPAILVVTY EGEHNHTLTVPKTSN ISKEI     
Cp4.1LG06g03010.1           197  5.84e-10 EDPAILVATY EGEHNHASHFQTELS LRSINGGKGS
Cp4.1LG08g01440.1           211  7.27e-10 SDPGMFIVTY TAEHNHPAPTHRNSL AGSTRQKANT
Cp4.1LG05g01350.1           264  1.12e-09 QQPSMLIVTY EGEHNHPTMSAHTHP TNLLSN    
Cp4.1LG14g02220.1           274  1.38e-09 SDPGAFVVTY TAEHNHAEPTRRNAL AGTTRKKFPA
Cp4.1LG01g00250.1           133  1.38e-09 SDPDVFIVTY TAEHNHAEPTRRNAL AGTTRKKFPA
Cp4.1LG03g02050.1           442  1.53e-09 EDPDSFITTY EGKHNHDISLGNANH VAPQME    
Cp4.1LG04g03970.1           334  2.82e-09 HDPKVVLTTY EGHHDHDMPPARTVT LNSAGSTAAH
Cp4.1LG17g06230.1           324  3.12e-09 EEPSMLIVTY EGEHNHPRIASQSEN T         
Cp4.1LG10g02340.1           294  3.12e-09 DDPAMLVVTY EGEHNHTLSLPQPST LILESS    
Cp4.1LG02g04820.1           321  3.79e-09 NDPAMLIVTY EGEHRHTQSSLPENM ATGVALVFES
Cp4.1LG15g08170.1           127  8.12e-09 VDPTKLVITY AFDHNHQLPATKSHH HHHNSSPSSA
Cp4.1LG04g02780.1           118  8.91e-09 VDPTKLVITY SFDHNHQLPATKSHH HQHHNSSPPS
Cp4.1LG03g08890.1           125  8.91e-09 EDQSVLVATY EGEHNHPQASQIDPT SARSVSIAPA
Cp4.1LG11g03940.1           206  1.17e-08 EDPSVVITTY EGQHCHHTVGFPRGG LNMAHKAAFG
Cp4.1LG07g00870.1            95  1.17e-08 DDPTVVITTY EGQHCHHTVGFPRGG GLNMAHEPAF
Cp4.1LG19g11800.1           144  1.40e-08 EDSSYVITTY EGIHSHESPFSKCCN DPIFHSHGSC
Cp4.1LG02g06760.1           364  1.53e-08 DDPTMLIVTY ENDHNHALSTQTPAP LLLESS    
Cp4.1LG02g05340.1           217  1.83e-08 EDPTILVATY EGEHSHASHFQTELS LRSINGGKAS
Cp4.1LG01g00130.1           156  1.83e-08 KDPTIVVTTY EGIHNHPSEKLMETL TPLLKQLQFL
Cp4.1LG07g03150.1           200  2.82e-08 QDSSYLVATY EGEHNHKKPNSGIEY QLVGPIHLGS
Cp4.1LG20g04680.1           125  3.63e-08 LDPTMLLITY SCEHNHSGPVSRNNN HNQAAAIAAV
Cp4.1LG06g01700.1           364  4.28e-08 DDPTMLIVTY ENDHNHAHSTETPAT LVLESS    
Cp4.1LG18g06480.1            87  5.05e-08 DDPTMLLVTY DGDHRHPQPPVTHLN VGVVSQKS  
Cp4.1LG06g04620.1           316  8.85e-08 KDPAMLIITY EGEHRHTPSSLLENR AAGVSLALDS
Cp4.1LG04g13250.1           258  1.52e-07 DDPAMLVVTY DGDHRHPPATVPRAV ADASVGFVSQ
Cp4.1LG03g12920.1           140  1.90e-07 RDEGVVVTTY EGIHSHPILKSADNF EYILSRMQIY
Cp4.1LG03g06840.1           144  2.20e-07 RDEGVVVTTY EGMHTHSIDKPTDNF EQILSRMQIY
Cp4.1LG03g15600.1           192  2.55e-07 EDCRMVITTY EGRHNHSPCDDSNSS EHEPFTSF  
Cp4.1LG18g05560.1           419  4.20e-07 ENPYAVIITY KGVHDHDMPVPKKRH SPPSAPRVAV
--------------------------------------------------------------------------------

--------------------------------------------------------------------------------
	Motif EGEHNHPLPAARRSS MEME-5 block diagrams
--------------------------------------------------------------------------------
SEQUENCE NAME            POSITION P-VALUE  MOTIF DIAGRAM
-------------            ----------------  -------------
Cp4.1LG14g08130.1                 1.5e-15  544_[5]_141
Cp4.1LG08g08130.1                 1.5e-15  587_[5]_138
Cp4.1LG18g02530.1                   2e-15  534_[5]_225
Cp4.1LG15g08740.1                 4.3e-14  206_[5]_70
Cp4.1LG14g07630.1                   7e-14  410_[5]_108
Cp4.1LG08g08540.1                   7e-14  448_[5]_115
Cp4.1LG10g05720.1                 1.1e-13  169_[5]_82
Cp4.1LG03g03290.1                 2.6e-13  368_[5]_92
Cp4.1LG00g01540.1                 2.6e-13  340_[5]_143
Cp4.1LG05g09980.1                 3.9e-13  504_[5]_56
Cp4.1LG19g07870.1                 4.7e-13  398_[5]_208
Cp4.1LG15g07340.1                 4.7e-13  331_[5]_175
Cp4.1LG10g09790.1                 4.7e-13  397_[5]_201
Cp4.1LG09g02180.1                 1.2e-12  411_[5]_24
Cp4.1LG01g12160.1                 1.2e-12  429_[5]_42
Cp4.1LG20g01990.1                 1.4e-12  202_[5]_275
Cp4.1LG16g07300.1                 1.4e-12  181_[5]_53
Cp4.1LG17g00040.1                 2.8e-12  60_[5]_96
Cp4.1LG02g11140.1                 3.3e-12  424_[5]_111
Cp4.1LG04g02450.1                 4.6e-12  156_[5]_70
Cp4.1LG01g01970.1                 1.1e-11  289_[5]_173
Cp4.1LG08g05270.1                 1.8e-11  214_[5]_94
Cp4.1LG03g11900.1                   2e-11  195_[5]_92
Cp4.1LG17g07650.1                 6.8e-11  88_[5]_46
Cp4.1LG02g15110.1                 8.8e-11  211_[5]_77
Cp4.1LG13g02760.1                 1.8e-10  229_[5]_98
Cp4.1LG12g03320.1                 1.8e-10  182_[5]_76
Cp4.1LG05g06330.1                 2.6e-10  220_[5]_94
Cp4.1LG12g06240.1                   3e-10  181_[5]_97
Cp4.1LG15g00430.1                 3.3e-10  294_[5]_1
Cp4.1LG09g07110.1                 3.3e-10  241_[5]_131
Cp4.1LG16g01500.1                 4.7e-10  261_[5]_6
Cp4.1LG05g11790.1                 4.7e-10  257_[5]_6
Cp4.1LG19g11130.1                 5.2e-10  182_[5]_5
Cp4.1LG06g03010.1                 5.8e-10  196_[5]_92
Cp4.1LG08g01440.1                 7.3e-10  210_[5]_108
Cp4.1LG05g01350.1                 1.1e-09  263_[5]_6
Cp4.1LG14g02220.1                 1.4e-09  273_[5]_55
Cp4.1LG01g00250.1                 1.4e-09  132_[5]_68
Cp4.1LG03g02050.1                 1.5e-09  441_[5]_6
Cp4.1LG04g03970.1                 2.8e-09  333_[5]_77
Cp4.1LG17g06230.1                 3.1e-09  323_[5]_1
Cp4.1LG10g02340.1                 3.1e-09  293_[5]_6
Cp4.1LG02g04820.1                 3.8e-09  320_[5]_11
Cp4.1LG15g08170.1                 8.1e-09  126_[5]_154
Cp4.1LG04g02780.1                 8.9e-09  117_[5]_142
Cp4.1LG03g08890.1                 8.9e-09  124_[5]_75
Cp4.1LG11g03940.1                 1.2e-08  205_[5]_94
Cp4.1LG07g00870.1                 1.2e-08  94_[5]_75
Cp4.1LG19g11800.1                 1.4e-08  143_[5]_21
Cp4.1LG02g06760.1                 1.5e-08  363_[5]_6
Cp4.1LG02g05340.1                 1.8e-08  216_[5]_94
Cp4.1LG01g00130.1                 1.8e-08  155_[5]_13
Cp4.1LG07g03150.1                 2.8e-08  199_[5]_96
Cp4.1LG20g04680.1                 3.6e-08  124_[5]_135
Cp4.1LG06g01700.1                 4.3e-08  363_[5]_6
Cp4.1LG18g06480.1                 5.1e-08  86_[5]_8
Cp4.1LG06g04620.1                 8.8e-08  315_[5]_11
Cp4.1LG04g13250.1                 1.5e-07  257_[5]_12
Cp4.1LG03g12920.1                 1.9e-07  139_[5]_13
Cp4.1LG03g06840.1                 2.2e-07  143_[5]_14
Cp4.1LG03g15600.1                 2.5e-07  191_[5]_8
Cp4.1LG18g05560.1                 4.2e-07  418_[5]_73
--------------------------------------------------------------------------------

--------------------------------------------------------------------------------
	Motif EGEHNHPLPAARRSS MEME-5 in BLOCKS format
--------------------------------------------------------------------------------
BL   MOTIF EGEHNHPLPAARRSS width=15 seqs=63
Cp4.1LG14g08130.1        (  545) EGKHNHDVPAARNSS  1 
Cp4.1LG08g08130.1        (  588) EGKHNHDVPAARNSS  1 
Cp4.1LG18g02530.1        (  535) EGKHNHEVPAARNGS  1 
Cp4.1LG15g08740.1        (  207) EGQHNHHCPATLRGH  1 
Cp4.1LG14g07630.1        (  411) EGKHNHDVPTAKTSS  1 
Cp4.1LG08g08540.1        (  449) EGKHNHDVPTAKTSS  1 
Cp4.1LG10g05720.1        (  170) EGQHNHPIPATLRGN  1 
Cp4.1LG03g03290.1        (  369) EGKHNHEVPAARGGG  1 
Cp4.1LG00g01540.1        (  341) EGKHNHLVPAARNSS  1 
Cp4.1LG05g09980.1        (  505) EGKHNHEIPAARGGG  1 
Cp4.1LG19g07870.1        (  399) EGNHNHPLPPAAMAM  1 
Cp4.1LG15g07340.1        (  332) EGNHNHPLPPAAMAM  1 
Cp4.1LG10g09790.1        (  398) EGNHNHPLPPAAMAM  1 
Cp4.1LG09g02180.1        (  412) EGKHNHDVPAGKISS  1 
Cp4.1LG01g12160.1        (  430) EGKHNHDVPAGKISS  1 
Cp4.1LG20g01990.1        (  203) EGNHNHPLPASATAM  1 
Cp4.1LG16g07300.1        (  182) EGKHNHYCPITLRGH  1 
Cp4.1LG17g00040.1        (   61) EGQHNHQSPILPRGS  1 
Cp4.1LG02g11140.1        (  425) EGKHNHEVPPARGSG  1 
Cp4.1LG04g02450.1        (  157) EGQHIHHCPATLRGH  1 
Cp4.1LG01g01970.1        (  290) EGTHNHPLPVGATAM  1 
Cp4.1LG08g05270.1        (  215) EGQHTHQSPVMPRGS  1 
Cp4.1LG03g11900.1        (  196) EGKHTHQSPIMPRGS  1 
Cp4.1LG17g07650.1        (   89) EGQHTHSTPVMTRST  1 
Cp4.1LG02g15110.1        (  212) EGEHNHPQSSLMEAT  1 
Cp4.1LG13g02760.1        (  230) TGEHIHPRPTHRNCL  1 
Cp4.1LG12g03320.1        (  183) EGQHIHQSPIMPRGA  1 
Cp4.1LG05g06330.1        (  221) TGDHTHPRPTHRNSL  1 
Cp4.1LG12g06240.1        (  182) EGQHTHSSPNMTRST  1 
Cp4.1LG15g00430.1        (  295) EGEHNHPKMSTQSAH  1 
Cp4.1LG09g07110.1        (  242) TSEHNHPWPTQRNAL  1 
Cp4.1LG16g01500.1        (  262) EGDHNHSQSVAEASS  1 
Cp4.1LG05g11790.1        (  258) EGDHNHSQSVAEASS  1 
Cp4.1LG19g11130.1        (  183) EGEHNHTLTVPKTSN  1 
Cp4.1LG06g03010.1        (  197) EGEHNHASHFQTELS  1 
Cp4.1LG08g01440.1        (  211) TAEHNHPAPTHRNSL  1 
Cp4.1LG05g01350.1        (  264) EGEHNHPTMSAHTHP  1 
Cp4.1LG14g02220.1        (  274) TAEHNHAEPTRRNAL  1 
Cp4.1LG01g00250.1        (  133) TAEHNHAEPTRRNAL  1 
Cp4.1LG03g02050.1        (  442) EGKHNHDISLGNANH  1 
Cp4.1LG04g03970.1        (  334) EGHHDHDMPPARTVT  1 
Cp4.1LG17g06230.1        (  324) EGEHNHPRIASQSEN  1 
Cp4.1LG10g02340.1        (  294) EGEHNHTLSLPQPST  1 
Cp4.1LG02g04820.1        (  321) EGEHRHTQSSLPENM  1 
Cp4.1LG15g08170.1        (  127) AFDHNHQLPATKSHH  1 
Cp4.1LG04g02780.1        (  118) SFDHNHQLPATKSHH  1 
Cp4.1LG03g08890.1        (  125) EGEHNHPQASQIDPT  1 
Cp4.1LG11g03940.1        (  206) EGQHCHHTVGFPRGG  1 
Cp4.1LG07g00870.1        (   95) EGQHCHHTVGFPRGG  1 
Cp4.1LG19g11800.1        (  144) EGIHSHESPFSKCCN  1 
Cp4.1LG02g06760.1        (  364) ENDHNHALSTQTPAP  1 
Cp4.1LG02g05340.1        (  217) EGEHSHASHFQTELS  1 
Cp4.1LG01g00130.1        (  156) EGIHNHPSEKLMETL  1 
Cp4.1LG07g03150.1        (  200) EGEHNHKKPNSGIEY  1 
Cp4.1LG20g04680.1        (  125) SCEHNHSGPVSRNNN  1 
Cp4.1LG06g01700.1        (  364) ENDHNHAHSTETPAT  1 
Cp4.1LG18g06480.1        (   87) DGDHRHPQPPVTHLN  1 
Cp4.1LG06g04620.1        (  316) EGEHRHTPSSLLENR  1 
Cp4.1LG04g13250.1        (  258) DGDHRHPPATVPRAV  1 
Cp4.1LG03g12920.1        (  140) EGIHSHPILKSADNF  1 
Cp4.1LG03g06840.1        (  144) EGMHTHSIDKPTDNF  1 
Cp4.1LG03g15600.1        (  192) EGRHNHSPCDDSNSS  1 
Cp4.1LG18g05560.1        (  419) KGVHDHDMPVPKKRH  1 
//

--------------------------------------------------------------------------------

--------------------------------------------------------------------------------
	Motif EGEHNHPLPAARRSS MEME-5 position-specific scoring matrix
--------------------------------------------------------------------------------
log-odds matrix: alength= 20 w= 15 n= 25227 bayes= 9.95447 E= 2.7e-202 
  -181   -843    -56    378   -784   -570   -559   -598   -175   -610   -573   -501   -622   -342   -551   -193     65   -565   -720   -678 
   -68    -65   -388   -439    -66    380   -473   -487   -440   -553   -475   -106   -573   -494   -430   -292   -471   -484   -401   -493 
  -269   -455    125    221   -432   -385    -80     40    177   -377    -42     27   -468    172   -126   -361   -143   -156   -380   -368 
  -946   -843   -903   -991   -899   -811    501   -989   -980   -926  -1018   -954   -921   -952   -912  -1035   -950  -1006   -765   -875 
  -436     35    -94   -433   -479   -402   -258      3   -411   -493   -450    379   -555   -384    -21   -154     26   -473   -381   -440 
  -946   -843   -903   -991   -899   -811    501   -989   -980   -926  -1018   -954   -921   -952   -912  -1035   -950  -1006   -765   -875 
    57   -452    125     52   -430   -383     96   -367   -118   -177   -327   -287    183    103   -271    -17     13   -369   -378    -80 
  -146    131   -358    -64   -370   -180    -86    118    -71    122     54   -334    -75    101    -13     16     14    149     96   -358 
   -91    -39   -190   -187   -494   -468    -20   -121   -426   -199     29   -488    311   -416   -444     -1   -181    -91   -490   -533 
   182   -361   -169   -340     43    -96   -385     95    -32    -74   -249    -69     21   -339   -367    -40    150    123   -337   -354 
   189   -448   -143   -113    -21     -3     57   -359   -224     23    173   -288    -36     80    -55    -37     87    -72   -376   -364 
    57   -451   -302    -51   -429   -174    -80   -102    118     22     48   -130     60     17    205   -233    105   -368   -377   -364 
   -28    -26    -19     75   -429    -41    -80     40   -118   -374    103    175    -75   -232    185    -88     87   -368   -377   -364 
   160     70   -305    -52   -425    160     57   -356   -226    -45   -323     80   -216   -236   -127    103   -142   -154   -376   -365 
  -150   -363   -417   -336    -11     28    192   -211   -334     78    205     78   -131   -335   -151     96     88   -115   -338    -75 
--------------------------------------------------------------------------------

--------------------------------------------------------------------------------
	Motif EGEHNHPLPAARRSS MEME-5 position-specific probability matrix
--------------------------------------------------------------------------------
letter-probability matrix: alength= 20 w= 15 nsites= 63 E= 2.7e-202 
 0.015873  0.000000  0.031746  0.809524  0.000000  0.000000  0.000000  0.000000  0.015873  0.000000  0.000000  0.000000  0.000000  0.000000  0.000000  0.031746  0.095238  0.000000  0.000000  0.000000 
 0.047619  0.015873  0.000000  0.000000  0.031746  0.857143  0.000000  0.000000  0.000000  0.000000  0.000000  0.031746  0.000000  0.000000  0.000000  0.015873  0.000000  0.000000  0.000000  0.000000 
 0.000000  0.000000  0.142857  0.285714  0.000000  0.000000  0.015873  0.047619  0.222222  0.000000  0.015873  0.063492  0.000000  0.158730  0.015873  0.000000  0.015873  0.015873  0.000000  0.000000 
 0.000000  0.000000  0.000000  0.000000  0.000000  0.000000  1.000000  0.000000  0.000000  0.000000  0.000000  0.000000  0.000000  0.000000  0.000000  0.000000  0.000000  0.000000  0.000000  0.000000 
 0.000000  0.031746  0.031746  0.000000  0.000000  0.000000  0.000000  0.047619  0.000000  0.000000  0.000000  0.682540  0.000000  0.000000  0.063492  0.047619  0.095238  0.000000  0.000000  0.000000 
 0.000000  0.000000  0.000000  0.000000  0.000000  0.000000  1.000000  0.000000  0.000000  0.000000  0.000000  0.000000  0.000000  0.000000  0.000000  0.000000  0.000000  0.000000  0.000000  0.000000 
 0.095238  0.000000  0.142857  0.079365  0.000000  0.000000  0.063492  0.000000  0.015873  0.015873  0.000000  0.000000  0.301587  0.095238  0.000000  0.111111  0.063492  0.000000  0.000000  0.015873 
 0.015873  0.047619  0.000000  0.031746  0.000000  0.015873  0.015873  0.079365  0.031746  0.158730  0.031746  0.000000  0.047619  0.095238  0.047619  0.142857  0.063492  0.158730  0.015873  0.000000 
 0.031746  0.015873  0.015873  0.015873  0.000000  0.000000  0.031746  0.015873  0.000000  0.015873  0.031746  0.000000  0.634921  0.000000  0.000000  0.142857  0.015873  0.031746  0.000000  0.000000 
 0.238095  0.000000  0.015873  0.000000  0.047619  0.031746  0.000000  0.063492  0.047619  0.031746  0.000000  0.031746  0.095238  0.000000  0.000000  0.095238  0.174603  0.126984  0.000000  0.000000 
 0.253968  0.000000  0.015873  0.015873  0.031746  0.063492  0.047619  0.000000  0.000000  0.079365  0.079365  0.000000  0.063492  0.079365  0.031746  0.095238  0.111111  0.031746  0.000000  0.000000 
 0.095238  0.000000  0.000000  0.031746  0.000000  0.015873  0.015873  0.015873  0.142857  0.079365  0.031746  0.015873  0.126984  0.047619  0.238095  0.015873  0.126984  0.000000  0.000000  0.000000 
 0.047619  0.015873  0.047619  0.095238  0.000000  0.047619  0.015873  0.047619  0.015873  0.000000  0.047619  0.190476  0.047619  0.000000  0.206349  0.063492  0.111111  0.000000  0.000000  0.000000 
 0.206349  0.031746  0.000000  0.031746  0.000000  0.206349  0.047619  0.000000  0.000000  0.047619  0.000000  0.095238  0.015873  0.000000  0.015873  0.269841  0.015873  0.015873  0.000000  0.000000 
 0.015873  0.000000  0.000000  0.000000  0.031746  0.079365  0.126984  0.000000  0.000000  0.111111  0.095238  0.095238  0.031746  0.000000  0.015873  0.253968  0.111111  0.015873  0.000000  0.015873 
--------------------------------------------------------------------------------

--------------------------------------------------------------------------------
	Motif EGEHNHPLPAARRSS MEME-5 regular expression
--------------------------------------------------------------------------------
EG[EK]HNHPXPAARR[SAG]S
--------------------------------------------------------------------------------


Time 604.33 secs.

********************************************************************************


********************************************************************************
MOTIF CZEAADAAVSKFKKVISLLSH MEME-6	width =  21  sites =  23  llr = 739  E-value = 2.9e-089
********************************************************************************
--------------------------------------------------------------------------------
	Motif CZEAADAAVSKFKKVISLLSH MEME-6 Description
--------------------------------------------------------------------------------
Simplified        A  1:346144::::::1::::1:
pos.-specific     C  3::::::::::2:::::::::
probability       D  ::2::3:::::::::::::1:
matrix            E  :233::1::1::2::::::::
                  F  :::::::::1:4::1::::::
                  G  :::::1:3:::::1:::::2:
                  H  :::::::::11:21::::::4
                  I  1:::::::2::::::6:::::
                  K  :::::::::14:56:::::::
                  L  2::1::::2::2::33:a9::
                  M  :1:::::::::1::::::1::
                  N  ::::11:::::::1::1::3:
                  P  :::::::::::::::::::::
                  Q  :31:::1::1:::::::::::
                  R  :::::1::::::1:::2:::3
                  S  :1:::22::33:::::5::31
                  T  ::::3::1::1:::::1::::
                  V  2112:::16::1::41:::::
                  W  :::::::::::::::::::::
                  Y  1::::::::::::::::::::

         bits    7.0                      
                 6.3                      
                 5.6                      
                 4.9                      
Relative         4.2                  *   
Entropy          3.5                * **  
(46.4 bits)      2.8     *   *  *   * **  
                 2.1 * ***  ** ********* *
                 1.4 *********************
                 0.7 *********************
                 0.0 ---------------------

Multilevel           CQEAADAAVSKFKKVISLLSH
consensus              AETSSGI S   LLR  NR
sequence                V    L            
                                          
                                          
--------------------------------------------------------------------------------

--------------------------------------------------------------------------------
	Motif CZEAADAAVSKFKKVISLLSH MEME-6 sites sorted by position p-value
--------------------------------------------------------------------------------
Sequence name             Start   P-value                    Site       
-------------             ----- ---------            ---------------------
Cp4.1LG10g02340.1            70  2.20e-21 SNSPTDFPTD CRAAADAAVSKFKKVISLLGR SRLGHARFRR
Cp4.1LG05g11790.1            53  3.02e-20 HSPPSNLDSD CQAVANAAVSHFKKAISLLGH SPRTGHARFR
Cp4.1LG02g04820.1            46  7.96e-19 SHKQSSNHVD CSDLTDATVSKFKKVISLLNR TGHARFRRGP
Cp4.1LG16g01500.1            53  1.73e-18 HSHPSNLDSD CQAVANSAVSHFKKAISLLGR SPRTGHARFR
Cp4.1LG02g06760.1            79  3.70e-17 TSTAPDAAAG YEAVADSVVNKFKKVISLLDR NRTGHARFRR
Cp4.1LG06g04620.1            46  4.08e-16 SHKKTSNHGD CSDLTDATVLKLKKAISLLNR TGHARFRRGP
Cp4.1LG04g13250.1            50  4.56e-16 QPTQKIADLD CSQVTDFTVSKFKRFISLLNR TGHARFRRGS
Cp4.1LG06g01700.1            81  6.36e-16 TSTTPNAIAP YDAVADSVVSNFKKVISLLDR NRTGHARFRR
Cp4.1LG06g04620.1            17  9.81e-16 SFPKIDDQMV IQEAASQGLKSMEHLIRLLSH KKTSNHGDCS
Cp4.1LG05g11790.1            23  1.09e-15 HLSAAMDQDS AVHEAASGIHTLKKLISLLSH SPPSNLDSDC
Cp4.1LG17g06230.1            38  2.05e-15 QDRQSKIQSC LMAETGAAVFKFRKVLCLLNS SSSGLGHARV
Cp4.1LG05g01350.1             4  3.08e-15        MEE VEEANRAAIHTCHGVLNLLAH QSPHLTPLTV
Cp4.1LG15g00430.1            37  5.07e-15 PQEQGELRKN LMVETGEAVFKLKKVVSLLNS GFGYAKVRRF
Cp4.1LG02g04820.1            17  9.96e-15 SFPKMDDQMA IQEAASQGLKSMEHLVRLLSH KQSSNHVDCS
Cp4.1LG15g00430.1             4  1.45e-14        MEE LEEANRAAIDSCHGVLNLLAH PSPQEQGELR
Cp4.1LG05g01350.1            32  2.52e-14 LAHQSPHLTP LTVETGEAVSKFRKVVSLLNS GFGHARARRL
Cp4.1LG16g01500.1            23  4.31e-14 QLSASMDQDS AVQEAATGLHTLKNLITLLSH SHPSNLDSDC
Cp4.1LG06g01700.1            38  5.14e-14 KLEENAAVSA VQEAASAGIQSVQNFLRLMSH TPNQHHSQHD
Cp4.1LG17g06230.1             4  5.61e-14        MEE VEEANREAVESCHKVLNLLTL ALPQDRQSKI
Cp4.1LG04g13250.1            18  1.84e-13 FPATIDDQTA IQDAASASLQSMEDLIRLLSK QQPTQKIADL
Cp4.1LG10g02340.1            23  2.76e-13 PSTTHNMEPN AVQEAASGLESVEKLIRLLSN AQHHSLPTST
Cp4.1LG02g06760.1            36  2.76e-13 SMEENAAVSA VQEAASAGIQSVHSFLTLVSH TPNQHHSQHD
Cp4.1LG19g11130.1            63  1.65e-12 QSPNSNHSNS TLDFPTDAVSKCKKIISLMGR SRVGHARFRR
--------------------------------------------------------------------------------

--------------------------------------------------------------------------------
	Motif CZEAADAAVSKFKKVISLLSH MEME-6 block diagrams
--------------------------------------------------------------------------------
SEQUENCE NAME            POSITION P-VALUE  MOTIF DIAGRAM
-------------            ----------------  -------------
Cp4.1LG10g02340.1                 2.8e-13  22_[6]_26_[6]_224
Cp4.1LG05g11790.1                 1.1e-15  22_[6]_9_[6]_205
Cp4.1LG02g04820.1                   1e-14  16_[6]_8_[6]_280
Cp4.1LG16g01500.1                 4.3e-14  22_[6]_9_[6]_209
Cp4.1LG02g06760.1                 2.8e-13  35_[6]_22_[6]_285
Cp4.1LG06g04620.1                 9.8e-16  16_[6]_8_[6]_275
Cp4.1LG04g13250.1                 4.6e-16  17_[6]_11_[6]_214
Cp4.1LG06g01700.1                 5.1e-14  37_[6]_22_[6]_283
Cp4.1LG17g06230.1                 5.6e-14  3_[6]_13_[6]_281
Cp4.1LG05g01350.1                 3.1e-15  3_[6]_7_[6]_232
Cp4.1LG15g00430.1                 1.5e-14  3_[6]_12_[6]_253
Cp4.1LG19g11130.1                 1.7e-12  62_[6]_119
--------------------------------------------------------------------------------

--------------------------------------------------------------------------------
	Motif CZEAADAAVSKFKKVISLLSH MEME-6 in BLOCKS format
--------------------------------------------------------------------------------
BL   MOTIF CZEAADAAVSKFKKVISLLSH width=21 seqs=23
Cp4.1LG10g02340.1        (   70) CRAAADAAVSKFKKVISLLGR  1 
Cp4.1LG05g11790.1        (   53) CQAVANAAVSHFKKAISLLGH  1 
Cp4.1LG02g04820.1        (   46) CSDLTDATVSKFKKVISLLNR  1 
Cp4.1LG16g01500.1        (   53) CQAVANSAVSHFKKAISLLGR  1 
Cp4.1LG02g06760.1        (   79) YEAVADSVVNKFKKVISLLDR  1 
Cp4.1LG06g04620.1        (   46) CSDLTDATVLKLKKAISLLNR  1 
Cp4.1LG04g13250.1        (   50) CSQVTDFTVSKFKRFISLLNR  1 
Cp4.1LG06g01700.1        (   81) YDAVADSVVSNFKKVISLLDR  1 
Cp4.1LG06g04620.1        (   17) IQEAASQGLKSMEHLIRLLSH  1 
Cp4.1LG05g11790.1        (   23) AVHEAASGIHTLKKLISLLSH  1 
Cp4.1LG17g06230.1        (   38) LMAETGAAVFKFRKVLCLLNS  1 
Cp4.1LG05g01350.1        (    4) VEEANRAAIHTCHGVLNLLAH  1 
Cp4.1LG15g00430.1        (   37) LMVETGEAVFKLKKVVSLLNS  1 
Cp4.1LG02g04820.1        (   17) IQEAASQGLKSMEHLVRLLSH  1 
Cp4.1LG15g00430.1        (    4) LEEANRAAIDSCHGVLNLLAH  1 
Cp4.1LG05g01350.1        (   32) LTVETGEAVSKFRKVVSLLNS  1 
Cp4.1LG16g01500.1        (   23) AVQEAATGLHTLKNLITLLSH  1 
Cp4.1LG06g01700.1        (   38) VQEAASAGIQSVQNFLRLMSH  1 
Cp4.1LG17g06230.1        (    4) VEEANREAVESCHKVLNLLTL  1 
Cp4.1LG04g13250.1        (   18) IQDAASASLQSMEDLIRLLSK  1 
Cp4.1LG10g02340.1        (   23) AVQEAASGLESVEKLIRLLSN  1 
Cp4.1LG02g06760.1        (   36) VQEAASAGIQSVHSFLTLVSH  1 
Cp4.1LG19g11130.1        (   63) TLDFPTDAVSKCKKIISLMGR  1 
//

--------------------------------------------------------------------------------

--------------------------------------------------------------------------------
	Motif CZEAADAAVSKFKKVISLLSH MEME-6 position-specific scoring matrix
--------------------------------------------------------------------------------
log-odds matrix: alength= 20 w= 21 n= 24765 bayes= 8.79057 E= 2.9e-089 
    94    360   -475   -387   -186   -369   -341    195   -373    140   -100   -374   -461   -346   -354   -371    -26    168   -200    142 
  -149   -330    -23    145   -307   -266   -188   -239   -107    -57    167   -171   -349    243     -7     -3    -23     99   -258   -247 
   186   -604    158    247   -561   -414     33   -424   -260   -435   -395   -342   -469    142   -361   -424   -354     52   -503   -476 
   243   -245   -463    196     35   -397   -378    -58   -392     60   -134   -403   -494   -367   -385   -400   -251    197   -243   -271 
   311   -301   -467   -518   -557   -319   -529   -506   -556   -541   -489    125    -84   -502   -541   -341    210   -403   -508   -565 
    94   -430    211   -223   -452     98   -269   -417   -247   -425   -387     86   -458   -252    117     73    -35   -417   -405   -367 
   252   -322    -23    113      5   -269   -209   -263   -129   -274   -227   -183   -368     86   -178     58    -29   -255   -279   -270 
   276   -284   -611   -591   -545    223   -591   -484   -622   -522   -469   -513   -535   -537   -564   -123    113     66   -497   -579 
  -419   -382   -736   -687   -387   -689   -753    271   -699    172   -275   -686   -746   -696   -720   -727   -434    335   -542   -545 
  -149   -334    -23     68     98   -264    176   -248     61    -58   -209    -11   -348    136   -152    120   -174   -251   -260   -247 
  -320   -454   -216   -259   -491   -313    138   -432    255   -435   -402      4   -491   -252   -223    137    106   -439   -414   -391 
  -415    316   -708   -620    338   -606   -556   -118   -610    158    254   -615   -659   -531   -571   -626   -430    128   -328   -391 
  -376   -489   -470    147   -559   -455    234   -408    301   -396   -367   -353   -554     10     95   -468   -371   -423   -386   -421 
  -304   -447    -11   -241   -472     43    137   -425    315   -430   -395     83   -475   -251    -18   -128   -299   -430   -409   -378 
    94   -321   -618   -538    181   -523   -502     84   -528    198   -173   -528   -602   -495   -511   -533   -344    294   -333   -369 
  -378   -363   -573   -548   -317   -577   -593    414   -532    177   -173   -537   -645   -543   -556   -584   -378    144   -407   -421 
  -201     73   -308   -362   -394   -318   -361   -357   -314   -393   -337     79   -443   -348    137    222     85   -387   -348   -370 
  -612   -566   -730   -722   -412   -652   -660   -321   -716    393   -308   -731   -719   -647   -659   -778   -624   -440   -479   -559 
  -375   -351   -566   -469   -188   -537   -455    -82   -466    369    164   -514   -529   -395   -418   -543   -381    -38   -279   -348 
    40   -461     75   -293   -541    142   -309   -553   -344   -562   -547    228   -514   -340   -414    141    -38   -541   -501   -434 
  -346   -467   -399   -297   -512   -419    349   -392     23    -61   -352    -25   -527   -205    262     -3   -345   -406   -373   -390 
--------------------------------------------------------------------------------

--------------------------------------------------------------------------------
	Motif CZEAADAAVSKFKKVISLLSH MEME-6 position-specific probability matrix
--------------------------------------------------------------------------------
letter-probability matrix: alength= 20 w= 21 nsites= 23 E= 2.9e-089 
 0.130435  0.260870  0.000000  0.000000  0.000000  0.000000  0.000000  0.130435  0.000000  0.173913  0.000000  0.000000  0.000000  0.000000  0.000000  0.000000  0.043478  0.173913  0.000000  0.086957 
 0.000000  0.000000  0.043478  0.173913  0.000000  0.000000  0.000000  0.000000  0.000000  0.043478  0.086957  0.000000  0.000000  0.304348  0.043478  0.130435  0.043478  0.130435  0.000000  0.000000 
 0.260870  0.000000  0.173913  0.304348  0.000000  0.000000  0.043478  0.000000  0.000000  0.000000  0.000000  0.000000  0.000000  0.130435  0.000000  0.000000  0.000000  0.086957  0.000000  0.000000 
 0.391304  0.000000  0.000000  0.260870  0.043478  0.000000  0.000000  0.000000  0.000000  0.086957  0.000000  0.000000  0.000000  0.000000  0.000000  0.000000  0.000000  0.217391  0.000000  0.000000 
 0.565217  0.000000  0.000000  0.000000  0.000000  0.000000  0.000000  0.000000  0.000000  0.000000  0.000000  0.130435  0.043478  0.000000  0.000000  0.000000  0.260870  0.000000  0.000000  0.000000 
 0.130435  0.000000  0.260870  0.000000  0.000000  0.130435  0.000000  0.000000  0.000000  0.000000  0.000000  0.086957  0.000000  0.000000  0.130435  0.217391  0.043478  0.000000  0.000000  0.000000 
 0.434783  0.000000  0.043478  0.130435  0.043478  0.000000  0.000000  0.000000  0.000000  0.000000  0.000000  0.000000  0.000000  0.086957  0.000000  0.217391  0.043478  0.000000  0.000000  0.000000 
 0.434783  0.000000  0.000000  0.000000  0.000000  0.304348  0.000000  0.000000  0.000000  0.000000  0.000000  0.000000  0.000000  0.000000  0.000000  0.043478  0.130435  0.086957  0.000000  0.000000 
 0.000000  0.000000  0.000000  0.000000  0.000000  0.000000  0.000000  0.217391  0.000000  0.217391  0.000000  0.000000  0.000000  0.000000  0.000000  0.000000  0.000000  0.565217  0.000000  0.000000 
 0.000000  0.000000  0.043478  0.086957  0.086957  0.000000  0.130435  0.000000  0.086957  0.043478  0.000000  0.043478  0.000000  0.130435  0.000000  0.347826  0.000000  0.000000  0.000000  0.000000 
 0.000000  0.000000  0.000000  0.000000  0.000000  0.000000  0.086957  0.000000  0.391304  0.000000  0.000000  0.043478  0.000000  0.000000  0.000000  0.347826  0.130435  0.000000  0.000000  0.000000 
 0.000000  0.173913  0.000000  0.000000  0.391304  0.000000  0.000000  0.000000  0.000000  0.173913  0.130435  0.000000  0.000000  0.000000  0.000000  0.000000  0.000000  0.130435  0.000000  0.000000 
 0.000000  0.000000  0.000000  0.173913  0.000000  0.000000  0.173913  0.000000  0.521739  0.000000  0.000000  0.000000  0.000000  0.043478  0.086957  0.000000  0.000000  0.000000  0.000000  0.000000 
 0.000000  0.000000  0.043478  0.000000  0.000000  0.086957  0.086957  0.000000  0.608696  0.000000  0.000000  0.086957  0.000000  0.000000  0.043478  0.043478  0.000000  0.000000  0.000000  0.000000 
 0.130435  0.000000  0.000000  0.000000  0.130435  0.000000  0.000000  0.043478  0.000000  0.260870  0.000000  0.000000  0.000000  0.000000  0.000000  0.000000  0.000000  0.434783  0.000000  0.000000 
 0.000000  0.000000  0.000000  0.000000  0.000000  0.000000  0.000000  0.608696  0.000000  0.260870  0.000000  0.000000  0.000000  0.000000  0.000000  0.000000  0.000000  0.130435  0.000000  0.000000 
 0.000000  0.043478  0.000000  0.000000  0.000000  0.000000  0.000000  0.000000  0.000000  0.000000  0.000000  0.130435  0.000000  0.000000  0.217391  0.521739  0.086957  0.000000  0.000000  0.000000 
 0.000000  0.000000  0.000000  0.000000  0.000000  0.000000  0.000000  0.000000  0.000000  1.000000  0.000000  0.000000  0.000000  0.000000  0.000000  0.000000  0.000000  0.000000  0.000000  0.000000 
 0.000000  0.000000  0.000000  0.000000  0.000000  0.000000  0.000000  0.000000  0.000000  0.869565  0.086957  0.000000  0.000000  0.000000  0.000000  0.000000  0.000000  0.043478  0.000000  0.000000 
 0.086957  0.000000  0.086957  0.000000  0.000000  0.173913  0.000000  0.000000  0.000000  0.000000  0.000000  0.260870  0.000000  0.000000  0.000000  0.347826  0.043478  0.000000  0.000000  0.000000 
 0.000000  0.000000  0.000000  0.000000  0.000000  0.000000  0.391304  0.000000  0.043478  0.043478  0.000000  0.043478  0.000000  0.000000  0.347826  0.130435  0.000000  0.000000  0.000000  0.000000 
--------------------------------------------------------------------------------

--------------------------------------------------------------------------------
	Motif CZEAADAAVSKFKKVISLLSH MEME-6 regular expression
--------------------------------------------------------------------------------
CQ[EA][AEV][AT][DS][AS][AG][VIL]S[KS]FKK[VL][IL][SR]LL[SN][HR]
--------------------------------------------------------------------------------


Time 680.38 secs.

********************************************************************************


********************************************************************************
MOTIF QFLVSQMASAJTKDPNFTAALAAAISSKI MEME-7	width =  29  sites =  10  llr = 579  E-value = 1.8e-071
********************************************************************************
--------------------------------------------------------------------------------
	Motif QFLVSQMASAJTKDPNFTAALAAAISSKI MEME-7 Description
--------------------------------------------------------------------------------
Simplified        A  3:::144535:23::::258:95a:::::
pos.-specific     C  :::1:::::::::::::::::::::::::
probability       D  :4:::::::::::a::::::::::::1::
matrix            E  2:::21:::::::::2::::::1::::::
                  F  :4::::::::::::::a::::::::::::
                  G  ::::1:::::::::::::2:::2:::4::
                  H  :::::::::::::::::::::::::::::
                  I  :::1::::::5::::::1:2::::8::37
                  K  ::::::::1::24::1::1::::::::4:
                  L  ::53:::::15:::::::::7:::1::2:
                  M  :1::::5:::::::::::::::::1:::1
                  N  :::::::::::::::6:::::::::::1:
                  P  11::::::::::::a::::::::::::::
                  Q  4:::35:::::::::::1:::::::::::
                  R  ::::::::::::1::::1:::::::::::
                  S  ::::3:1164::2::1::1::::::75::
                  T  ::4::::3:::6:::::5::::2::3:::
                  V  ::15:::1::::::::::1:31::::::2
                  W  :::::::::::::::::::::::::::::
                  Y  :::::::::::::::::::::::::::::

         bits    7.0                              
                 6.3                              
                 5.6                              
                 4.9                 *            
Relative         4.2              *  *      **    
Entropy          3.5       *   *  ** *  * * **   *
(83.6 bits)      2.8  *** **   ** ****  *** ***  *
                 2.1 **** ************************
                 1.4 *****************************
                 0.7 *****************************
                 0.0 -----------------------------

Multilevel           QDLVQQMASAITKDPNFTAALAAAISSKI
consensus            AFTLSAATASLAA  E AGIV G  TGIV
sequence             E   E      KS         T    L 
                                                  
                                                  
--------------------------------------------------------------------------------

--------------------------------------------------------------------------------
	Motif QFLVSQMASAJTKDPNFTAALAAAISSKI MEME-7 sites sorted by position p-value
--------------------------------------------------------------------------------
Sequence name             Start   P-value                        Site           
-------------             ----- ---------            -----------------------------
Cp4.1LG03g08890.1           183  1.88e-33 NPRFESPEVQ QFLVEQMASSLTKDPNFTAALAAAISGKI FQH       
Cp4.1LG02g15110.1           272  1.88e-33 SPRFQSPEMQ QFLVEQMASSLTKDPNFTAALAAAISGKI FPH       
Cp4.1LG19g07870.1           553  1.97e-29 ASSQPSGASF ADTLSAATAAITADPNFTAALAAAISSII GGAHSNNNNT
Cp4.1LG10g09790.1           548  1.97e-29 PTTQSGGASF ADTLSAATAAITADPNFTAALAAAISSII GGAHSNTNST
Cp4.1LG02g05340.1           289  4.57e-25 AASTEAAVWQ EFLVQQMASSLKKDPEFAGIVAGAISGKV LGNQTNRE  
Cp4.1LG06g03010.1           269  1.95e-24 AVSTEAAVWQ EFLVQQMASSLKKDPEFAGIVAGAISDKV LGNQTN    
Cp4.1LG07g03150.1           275  2.57e-23 ELERPSTSTQ QMVCQQMASLLTRDPNFTKALVTAITGNM VEKEVWR   
Cp4.1LG15g07340.1           467  3.07e-23 PPPPALQNPL ADTLSAASAAIASDPNFIAALATAMTSLI GGSHHQKENG
Cp4.1LG20g01990.1           376  5.30e-22 MSLPHQQPPL PDTIAAATKAITADPSFQSALAAALTSII GSGGTSAGTV
Cp4.1LG01g01970.1           403  6.62e-21 TWKSAAEENK QPLVGESVSAIASDPKFRVAVAEAISSLI NKDGNLTAPN
--------------------------------------------------------------------------------

--------------------------------------------------------------------------------
	Motif QFLVSQMASAJTKDPNFTAALAAAISSKI MEME-7 block diagrams
--------------------------------------------------------------------------------
SEQUENCE NAME            POSITION P-VALUE  MOTIF DIAGRAM
-------------            ----------------  -------------
Cp4.1LG03g08890.1                 1.9e-33  182_[7]_3
Cp4.1LG02g15110.1                 1.9e-33  271_[7]_3
Cp4.1LG19g07870.1                   2e-29  552_[7]_40
Cp4.1LG10g09790.1                   2e-29  547_[7]_37
Cp4.1LG02g05340.1                 4.6e-25  288_[7]_8
Cp4.1LG06g03010.1                 1.9e-24  268_[7]_6
Cp4.1LG07g03150.1                 2.6e-23  274_[7]_7
Cp4.1LG15g07340.1                 3.1e-23  466_[7]_26
Cp4.1LG20g01990.1                 5.3e-22  375_[7]_88
Cp4.1LG01g01970.1                 6.6e-21  402_[7]_46
--------------------------------------------------------------------------------

--------------------------------------------------------------------------------
	Motif QFLVSQMASAJTKDPNFTAALAAAISSKI MEME-7 in BLOCKS format
--------------------------------------------------------------------------------
BL   MOTIF QFLVSQMASAJTKDPNFTAALAAAISSKI width=29 seqs=10
Cp4.1LG03g08890.1        (  183) QFLVEQMASSLTKDPNFTAALAAAISGKI  1 
Cp4.1LG02g15110.1        (  272) QFLVEQMASSLTKDPNFTAALAAAISGKI  1 
Cp4.1LG19g07870.1        (  553) ADTLSAATAAITADPNFTAALAAAISSII  1 
Cp4.1LG10g09790.1        (  548) ADTLSAATAAITADPNFTAALAAAISSII  1 
Cp4.1LG02g05340.1        (  289) EFLVQQMASSLKKDPEFAGIVAGAISGKV  1 
Cp4.1LG06g03010.1        (  269) EFLVQQMASSLKKDPEFAGIVAGAISDKV  1 
Cp4.1LG07g03150.1        (  275) QMVCQQMASLLTRDPNFTKALVTAITGNM  1 
Cp4.1LG15g07340.1        (  467) ADTLSAASAAIASDPNFIAALATAMTSLI  1 
Cp4.1LG20g01990.1        (  376) PDTIAAATKAITADPSFQSALAAALTSII  1 
Cp4.1LG01g01970.1        (  403) QPLVGESVSAIASDPKFRVAVAEAISSLI  1 
//

--------------------------------------------------------------------------------

--------------------------------------------------------------------------------
	Motif QFLVSQMASAJTKDPNFTAALAAAISSKI MEME-7 position-specific scoring matrix
--------------------------------------------------------------------------------
log-odds matrix: alength= 20 w= 29 n= 24149 bayes= 10.6713 E= 1.8e-071 
   181   -389    -74    200   -385   -281   -224   -284   -131   -292   -247   -201     -4    277   -202   -280   -214   -272   -324   -314 
  -174   -240    243   -167    320   -282   -218    -95   -212   -128    189   -197      4   -206   -244   -287   -201   -139   -128    -67 
  -243   -242   -526   -451   -171   -431   -423     20   -436    281    -72   -438   -513   -401   -419   -422    246    114   -247   -289 
  -229    213   -522   -458   -233   -461   -453    189   -461    198   -132   -462   -527   -448   -448   -477   -257    316   -310   -335 
    57   -288    -98    168   -289     34   -156   -220    -76   -230   -184   -116   -308    226   -129     86   -141   -217   -237   -223 
   223   -363    -97    138   -419   -286   -240   -310   -151   -318   -273   -219   -378    315   -213   -296   -239   -293   -347   -351 
   260   -181   -472   -436   -388   -218   -448   -292   -452   -344    429   -385   -423   -399   -421    -16   -217   -245   -360   -419 
   305   -133   -415   -369   -331   -192   -399   -236   -383   -288   -244   -351   -433   -359   -366    -35    191     59   -296   -371 
   200   -197   -310   -292   -387   -227   -336   -328     43   -359   -310   -242   -402   -286   -274    216    -98   -285   -335   -368 
   304   -142   -424   -380   -349   -194   -413   -262   -398     25   -267   -364   -433   -371   -380    133   -206   -185   -314   -387 
  -367   -331   -658   -588   -157   -587   -541    371   -582    288    -55   -593   -615   -491   -545   -628   -380    -83   -277   -348 
   125   -223   -309   -262   -354   -282   -296   -225    125   -309   -231   -220   -413   -227   -196   -167    326   -224   -294   -344 
   187   -319   -239   -142   -353   -275   -179   -255    249   -256   -218   -185   -376    -95    110     39   -196   -260   -253   -265 
  -333   -385    401   -123   -416   -376   -322   -362   -416   -414   -392   -136   -536   -381   -409   -428   -399   -387   -332   -374 
  -279   -417   -434   -409   -458   -412   -435   -406   -407   -405   -432   -458    363   -395   -416   -427   -376   -409   -419   -483 
  -224   -356    -90    148   -384   -209   -180   -333     49   -359   -324    333   -388   -176   -222    -42   -215   -350   -322   -299 
  -353   -268   -477   -462    470   -463   -420   -201   -483   -151   -221   -470   -495   -486   -480   -449   -435   -277   -128    -64 
   104   -209   -232   -162   -242   -276   -213    101   -124   -187   -134   -169   -356     61     43   -148    298   -139   -209   -235 
   337    -73   -337   -278   -265     31   -334   -182    -80   -218   -177   -314   -454   -300   -292    -78   -182      7   -226   -308 
   351   -140   -434   -382   -299   -220   -424    202   -400   -213   -208   -393   -484   -392   -387   -225   -229    -81   -298   -364 
  -330   -302   -592   -510   -166   -533   -488      6   -506    335    -56   -532   -558   -437   -469   -557   -345    221   -275   -335 
   362    -87   -379   -324   -286   -162   -373   -180   -344   -236   -199   -349   -465   -344   -332   -163   -196     28   -250   -337 
   302   -146   -279     39   -335    121   -325   -258   -280   -292   -249   -261   -412   -271   -302   -195    128   -179   -294   -346 
   386   -211   -486   -455   -416   -267   -478   -343   -476   -380   -345   -449   -513   -455   -450   -282   -298   -252   -363   -450 
  -288   -295   -427   -406   -199   -444   -442    435   -383     57     99   -394   -516   -395   -406   -441   -276     95   -261   -281 
  -138   -167   -325   -360   -313   -289   -338   -276   -294   -319   -257   -181   -376   -324   -282    251    166   -324   -269   -302 
  -191   -309     90   -215   -445    252   -243   -439   -274   -457   -430    -74   -420   -267   -335    180   -235   -397   -397   -357 
  -164   -219   -298   -201   -198   -297   -215    278    237    139   -101     61   -390   -150    -90   -295   -178    -90   -187   -209 
  -275   -283   -412   -393   -225   -433   -438    431   -370     -2     72   -380   -508   -392   -398   -428   -263    157   -273   -281 
--------------------------------------------------------------------------------

--------------------------------------------------------------------------------
	Motif QFLVSQMASAJTKDPNFTAALAAAISSKI MEME-7 position-specific probability matrix
--------------------------------------------------------------------------------
letter-probability matrix: alength= 20 w= 29 nsites= 10 E= 1.8e-071 
 0.300000  0.000000  0.000000  0.200000  0.000000  0.000000  0.000000  0.000000  0.000000  0.000000  0.000000  0.000000  0.100000  0.400000  0.000000  0.000000  0.000000  0.000000  0.000000  0.000000 
 0.000000  0.000000  0.400000  0.000000  0.400000  0.000000  0.000000  0.000000  0.000000  0.000000  0.100000  0.000000  0.100000  0.000000  0.000000  0.000000  0.000000  0.000000  0.000000  0.000000 
 0.000000  0.000000  0.000000  0.000000  0.000000  0.000000  0.000000  0.000000  0.000000  0.500000  0.000000  0.000000  0.000000  0.000000  0.000000  0.000000  0.400000  0.100000  0.000000  0.000000 
 0.000000  0.100000  0.000000  0.000000  0.000000  0.000000  0.000000  0.100000  0.000000  0.300000  0.000000  0.000000  0.000000  0.000000  0.000000  0.000000  0.000000  0.500000  0.000000  0.000000 
 0.100000  0.000000  0.000000  0.200000  0.000000  0.100000  0.000000  0.000000  0.000000  0.000000  0.000000  0.000000  0.000000  0.300000  0.000000  0.300000  0.000000  0.000000  0.000000  0.000000 
 0.400000  0.000000  0.000000  0.100000  0.000000  0.000000  0.000000  0.000000  0.000000  0.000000  0.000000  0.000000  0.000000  0.500000  0.000000  0.000000  0.000000  0.000000  0.000000  0.000000 
 0.400000  0.000000  0.000000  0.000000  0.000000  0.000000  0.000000  0.000000  0.000000  0.000000  0.500000  0.000000  0.000000  0.000000  0.000000  0.100000  0.000000  0.000000  0.000000  0.000000 
 0.500000  0.000000  0.000000  0.000000  0.000000  0.000000  0.000000  0.000000  0.000000  0.000000  0.000000  0.000000  0.000000  0.000000  0.000000  0.100000  0.300000  0.100000  0.000000  0.000000 
 0.300000  0.000000  0.000000  0.000000  0.000000  0.000000  0.000000  0.000000  0.100000  0.000000  0.000000  0.000000  0.000000  0.000000  0.000000  0.600000  0.000000  0.000000  0.000000  0.000000 
 0.500000  0.000000  0.000000  0.000000  0.000000  0.000000  0.000000  0.000000  0.000000  0.100000  0.000000  0.000000  0.000000  0.000000  0.000000  0.400000  0.000000  0.000000  0.000000  0.000000 
 0.000000  0.000000  0.000000  0.000000  0.000000  0.000000  0.000000  0.500000  0.000000  0.500000  0.000000  0.000000  0.000000  0.000000  0.000000  0.000000  0.000000  0.000000  0.000000  0.000000 
 0.200000  0.000000  0.000000  0.000000  0.000000  0.000000  0.000000  0.000000  0.200000  0.000000  0.000000  0.000000  0.000000  0.000000  0.000000  0.000000  0.600000  0.000000  0.000000  0.000000 
 0.300000  0.000000  0.000000  0.000000  0.000000  0.000000  0.000000  0.000000  0.400000  0.000000  0.000000  0.000000  0.000000  0.000000  0.100000  0.200000  0.000000  0.000000  0.000000  0.000000 
 0.000000  0.000000  1.000000  0.000000  0.000000  0.000000  0.000000  0.000000  0.000000  0.000000  0.000000  0.000000  0.000000  0.000000  0.000000  0.000000  0.000000  0.000000  0.000000  0.000000 
 0.000000  0.000000  0.000000  0.000000  0.000000  0.000000  0.000000  0.000000  0.000000  0.000000  0.000000  0.000000  1.000000  0.000000  0.000000  0.000000  0.000000  0.000000  0.000000  0.000000 
 0.000000  0.000000  0.000000  0.200000  0.000000  0.000000  0.000000  0.000000  0.100000  0.000000  0.000000  0.600000  0.000000  0.000000  0.000000  0.100000  0.000000  0.000000  0.000000  0.000000 
 0.000000  0.000000  0.000000  0.000000  1.000000  0.000000  0.000000  0.000000  0.000000  0.000000  0.000000  0.000000  0.000000  0.000000  0.000000  0.000000  0.000000  0.000000  0.000000  0.000000 
 0.200000  0.000000  0.000000  0.000000  0.000000  0.000000  0.000000  0.100000  0.000000  0.000000  0.000000  0.000000  0.000000  0.100000  0.100000  0.000000  0.500000  0.000000  0.000000  0.000000 
 0.500000  0.000000  0.000000  0.000000  0.000000  0.200000  0.000000  0.000000  0.100000  0.000000  0.000000  0.000000  0.000000  0.000000  0.000000  0.100000  0.000000  0.100000  0.000000  0.000000 
 0.800000  0.000000  0.000000  0.000000  0.000000  0.000000  0.000000  0.200000  0.000000  0.000000  0.000000  0.000000  0.000000  0.000000  0.000000  0.000000  0.000000  0.000000  0.000000  0.000000 
 0.000000  0.000000  0.000000  0.000000  0.000000  0.000000  0.000000  0.000000  0.000000  0.700000  0.000000  0.000000  0.000000  0.000000  0.000000  0.000000  0.000000  0.300000  0.000000  0.000000 
 0.900000  0.000000  0.000000  0.000000  0.000000  0.000000  0.000000  0.000000  0.000000  0.000000  0.000000  0.000000  0.000000  0.000000  0.000000  0.000000  0.000000  0.100000  0.000000  0.000000 
 0.500000  0.000000  0.000000  0.100000  0.000000  0.200000  0.000000  0.000000  0.000000  0.000000  0.000000  0.000000  0.000000  0.000000  0.000000  0.000000  0.200000  0.000000  0.000000  0.000000 
 1.000000  0.000000  0.000000  0.000000  0.000000  0.000000  0.000000  0.000000  0.000000  0.000000  0.000000  0.000000  0.000000  0.000000  0.000000  0.000000  0.000000  0.000000  0.000000  0.000000 
 0.000000  0.000000  0.000000  0.000000  0.000000  0.000000  0.000000  0.800000  0.000000  0.100000  0.100000  0.000000  0.000000  0.000000  0.000000  0.000000  0.000000  0.000000  0.000000  0.000000 
 0.000000  0.000000  0.000000  0.000000  0.000000  0.000000  0.000000  0.000000  0.000000  0.000000  0.000000  0.000000  0.000000  0.000000  0.000000  0.700000  0.300000  0.000000  0.000000  0.000000 
 0.000000  0.000000  0.100000  0.000000  0.000000  0.400000  0.000000  0.000000  0.000000  0.000000  0.000000  0.000000  0.000000  0.000000  0.000000  0.500000  0.000000  0.000000  0.000000  0.000000 
 0.000000  0.000000  0.000000  0.000000  0.000000  0.000000  0.000000  0.300000  0.400000  0.200000  0.000000  0.100000  0.000000  0.000000  0.000000  0.000000  0.000000  0.000000  0.000000  0.000000 
 0.000000  0.000000  0.000000  0.000000  0.000000  0.000000  0.000000  0.700000  0.000000  0.000000  0.100000  0.000000  0.000000  0.000000  0.000000  0.000000  0.000000  0.200000  0.000000  0.000000 
--------------------------------------------------------------------------------

--------------------------------------------------------------------------------
	Motif QFLVSQMASAJTKDPNFTAALAAAISSKI MEME-7 regular expression
--------------------------------------------------------------------------------
[QAE][DF][LT][VL][QSE][QA][MA][AT][SA][AS][IL][TAK][KAS]DP[NE]F[TA][AG][AI][LV]A[AGT]AI[ST][SG][KIL][IV]
--------------------------------------------------------------------------------


Time 753.97 secs.

********************************************************************************


********************************************************************************
MOTIF LQEELDRMKAENKKLRDMLSVVYENYSTLQMHVATLMQQQK MEME-8	width =  41  sites =   8  llr = 643  E-value = 1.3e-067
********************************************************************************
--------------------------------------------------------------------------------
	Motif LQEELDRMKAENKKLRDMLSVVYENYSTLQMHVATLMQQQK MEME-8 Description
--------------------------------------------------------------------------------
Simplified        A  ::1::::::4::::::::::1::::::1:::::3:::::::
pos.-specific     C  ::::::::::::::::::::::1:::::::::::1::::::
probability       D  :::::3::::::::::4:::::::1::1::::::3::::::
matrix            E  :358:1:::1a:::::11:1:::5:::::1:::::::::::
                  F  ::::::::::::::::::::::::::::::::11:1:::::
                  G  ::::::::::::3::::::1::::::::::1:::::::::1
                  H  ::::::::::::3:::::::3::::::::::5::::::1::
                  I  1::::::11:::::::::::1:::::1:::::3:1111:::
                  K  :::3:1:341::36:11::::::13:::::31::::::3:4
                  L  9:::9::1::::1:a:::9:::::::::a:::3::61:::1
                  M  :13:1::41::::1:::9:::31:::1:::5::3::4::::
                  N  :::::3::1::a:::1:::1:::36:13::1::::::314:
                  P  :::::::::::::::::::::::::::::::::::::::::
                  Q  :5:::3::::::1:::4:::3:::::1::6:4:::115453
                  R  ::::::a::::::3:4:::3::1::::::3::::::::::1
                  S  ::::::::33:::::3:::3::11::3::::::1:::1:1:
                  T  :::::::::::::::1:::1:11:::14::::::4:::1::
                  V  :11::::1:1::::::::1:361::::1::::43::3::::
                  W  :::::::::::::::::::::::::::::::::::::::::
                  Y  ::::::::::::::::::::::3::a1:::::::1::::::

         bits    7.0                                          
                 6.3                                          
                 5.6                                          
                 4.9                  *       *               
Relative         4.2       *   **  *  *       *  *            
Entropy          3.5 *  ** *   **  *  **  *   *  *  *         
(115.9 bits)     2.8 ***** **  ** **  **  *  **  *****  *** * 
                 2.1 ********* ***** *** ****** **************
                 1.4 *****************************************
                 0.7 *****************************************
                 0.0 -----------------------------------------

Multilevel           LQEELDRMKAENGKLRDMLRHVYENYSTLQMHVATLMQQQK
consensus             EMK N KSS  HR SQ  SQM NK  N RKQIMD VNKNQ
sequence                  Q      K       V           LV       
                                                              
                                                              
--------------------------------------------------------------------------------

--------------------------------------------------------------------------------
	Motif LQEELDRMKAENKKLRDMLSVVYENYSTLQMHVATLMQQQK MEME-8 sites sorted by position p-value
--------------------------------------------------------------------------------
Sequence name             Start   P-value                              Site                 
-------------             ----- ---------            -----------------------------------------
Cp4.1LG10g09790.1           151  2.95e-42 DKRAKNELAQ LQMELQRMKAENHKLRDMLSHVSNNYSTLQMHFFTLLQQNQ ASQPGHEAEI
Cp4.1LG19g07870.1           152  3.20e-41 DKRAKNELAQ LQVELQRMNAENHKLRDMLSHVRNNYTTLQMHISTFMQQQQ QQQQQQNQAL
Cp4.1LG06g03010.1            37  1.50e-35 KAQGSDSSRR LEEELDRKMVENGKLSQMLRIMYEKYINLQKQVMCLVSHQK QSSEMEALIS
Cp4.1LG15g07340.1           109  1.34e-34 DKRAKNERAV LQAELERLKSENLRLKDMLNQVTSNYQALQMHLATLIQTQK AADVADPIEE
Cp4.1LG02g05340.1            58  2.72e-34 ANKGSDFRAT LEEKLDRKIKENGRLSQMLRAMYEKYMNLQKQVMYLVNQQK VQSSEIEGVS
Cp4.1LG02g15110.1            52  7.42e-33 KVSVKEETGA LMEELKRVSAENKKLTEMLTVVCENYNTLRGHLVDQMNKNG EKEVFCSKKR
Cp4.1LG07g03150.1            42  8.78e-30 TPTKEEAPGV IVEKLNRISSENQKLNQMLGVVVENYSVLRNQVVDLMIKSR KRKAGCDNCN
Cp4.1LG01g01970.1            72  4.97e-27 HNVNVGEISE LQMEMNRMKEENKMLRKEVEQTMKDYYDLEMKIAIIQQNNL QKKDSHNFLP
--------------------------------------------------------------------------------

--------------------------------------------------------------------------------
	Motif LQEELDRMKAENKKLRDMLSVVYENYSTLQMHVATLMQQQK MEME-8 block diagrams
--------------------------------------------------------------------------------
SEQUENCE NAME            POSITION P-VALUE  MOTIF DIAGRAM
-------------            ----------------  -------------
Cp4.1LG10g09790.1                 2.9e-42  150_[8]_422
Cp4.1LG19g07870.1                 3.2e-41  151_[8]_429
Cp4.1LG06g03010.1                 1.5e-35  36_[8]_226
Cp4.1LG15g07340.1                 1.3e-34  108_[8]_372
Cp4.1LG02g05340.1                 2.7e-34  57_[8]_227
Cp4.1LG02g15110.1                 7.4e-33  51_[8]_211
Cp4.1LG07g03150.1                 8.8e-30  41_[8]_228
Cp4.1LG01g01970.1                   5e-27  71_[8]_365
--------------------------------------------------------------------------------

--------------------------------------------------------------------------------
	Motif LQEELDRMKAENKKLRDMLSVVYENYSTLQMHVATLMQQQK MEME-8 in BLOCKS format
--------------------------------------------------------------------------------
BL   MOTIF LQEELDRMKAENKKLRDMLSVVYENYSTLQMHVATLMQQQK width=41 seqs=8
Cp4.1LG10g09790.1        (  151) LQMELQRMKAENHKLRDMLSHVSNNYSTLQMHFFTLLQQNQ  1 
Cp4.1LG19g07870.1        (  152) LQVELQRMNAENHKLRDMLSHVRNNYTTLQMHISTFMQQQQ  1 
Cp4.1LG06g03010.1        (   37) LEEELDRKMVENGKLSQMLRIMYEKYINLQKQVMCLVSHQK  1 
Cp4.1LG15g07340.1        (  109) LQAELERLKSENLRLKDMLNQVTSNYQALQMHLATLIQTQK  1 
Cp4.1LG02g05340.1        (   58) LEEKLDRKIKENGRLSQMLRAMYEKYMNLQKQVMYLVNQQK  1 
Cp4.1LG02g15110.1        (   52) LMEELKRVSAENKKLTEMLTVVCENYNTLRGHLVDQMNKNG  1 
Cp4.1LG07g03150.1        (   42) IVEKLNRISSENQKLNQMLGVVVENYSVLRNQVVDLMIKSR  1 
Cp4.1LG01g01970.1        (   72) LQMEMNRMKEENKMLRKEVEQTMKDYYDLEMKIAIIQQNNL  1 
//

--------------------------------------------------------------------------------

--------------------------------------------------------------------------------
	Motif LQEELDRMKAENKKLRDMLSVVYENYSTLQMHVATLMQQQK MEME-8 position-specific scoring matrix
--------------------------------------------------------------------------------
log-odds matrix: alength= 20 w= 41 n= 23225 bayes= 11.5029 E= 1.3e-067 
  -303   -278   -502   -407   -117   -469   -391    131   -403    363      9   -449   -466   -332   -356   -478   -310   -106   -210   -278 
  -182   -285   -208     91   -326   -329    -70   -220   -177   -202     85   -213   -351    382   -172   -305   -229    -40   -209   -299 
    77   -215   -116    273   -202   -255   -217    -54   -140   -125    294   -204   -337   -115   -193   -251   -153    102   -199   -211 
  -203   -511    -60    353   -497   -327   -289   -341    157   -352   -317   -251   -390   -108   -207   -350   -278   -322   -408   -396 
  -302   -279   -496   -399   -114   -464   -383     -9   -395    364    171   -443   -459   -324   -348   -472   -309   -120   -205   -273 
  -128   -328    180    140   -317   -202   -160   -247     86   -256   -213    182   -317    201   -146   -208   -157   -244   -265   -241 
  -336   -281   -449   -437   -440   -395   -241   -338   -144   -357   -362   -347   -429   -255    410   -451   -380   -445   -220   -388 
  -127   -136   -387   -300    -98   -299   -267    197    146    116    360   -297   -387   -261   -269   -301   -142    137   -126   -158 
   -74   -216   -126    -45   -198   -193   -116    130    206   -136    184     83   -279    -47    -61     50    -92   -120   -160   -159 
   260   -148   -143     64   -230   -164   -154   -151     51   -175   -132   -135   -308    -84   -116     25   -115     48   -186   -198 
  -466   -545   -220    406   -572   -503   -486   -454   -549   -562   -529   -438   -682   -380   -548   -610   -527   -519   -480   -553 
  -354   -327   -234   -398   -362   -341   -151   -271   -333   -379   -336    409   -458   -296   -358   -277   -273   -360   -258   -335 
  -111   -275   -150    -65   -267    139    241   -187    180     49   -154   -117   -307    122    -25   -201   -131   -195   -197   -193 
  -293   -352   -419   -293   -465   -388   -275   -300    361   -340     93   -295   -469   -197    125   -419   -309   -360   -292   -364 
  -348   -323   -525   -449   -165   -477   -424    -61   -443    379    -42   -484   -497   -376   -396   -515   -358   -169   -248   -312 
  -114   -277   -138    -69   -278   -210   -128   -201    113   -208   -165     91   -308    -56    235     60     80   -208   -206   -203 
  -161   -444    237    183   -419   -277   -239   -300     81   -310   -269   -186   -350    258   -209   -288   -224   -282   -358   -334 
  -407   -347   -492   -232   -362   -493   -487   -185   -464   -162    540   -490   -560   -467   -504   -531   -420   -289   -236   -310 
  -293   -271   -494   -399   -123   -460   -386      1   -396    363      6   -441   -460   -329   -351   -468   -302     52   -212   -276 
   -76   -252    -84     99   -239     48   -107   -178    -32   -188   -141     95   -272    -43    164     60     78   -181   -188   -173 
    73   -131   -230   -145   -110   -232    231    170   -138    -44    -23   -184   -320    184   -159   -223   -102    190   -112   -129 
  -137   -171   -422   -360   -195   -368   -352     77   -364    -88    275   -378   -435   -358   -343   -381     54    346   -242   -277 
   -85    204   -272   -195     -5   -244   -142     35   -190    -32    196   -215   -329   -182     57    -43     74    114    -66    278 
  -144   -333    -58    275   -332   -197   -164   -266     89   -274   -233    189   -329    -93   -150    -16   -167   -263   -278   -251 
  -247   -341     94   -161   -386   -188   -160   -342    143   -387   -359    347   -392   -199   -244   -218   -214   -379   -317   -298 
  -488   -426   -547   -564    -93   -491   -293   -399   -543   -372   -406   -486   -583   -488   -490   -573   -509   -447   -117    506 
   -68   -176   -143    -64   -150   -198   -126    134    -63   -101    180     72   -282     99   -103     64     92    -78   -138    141 
    60   -220     66    -90   -248   -208   -163   -146   -101   -199   -146    161   -316   -106   -145   -141    253     65   -209   -213 
  -348   -323   -525   -449   -165   -477   -424    -61   -443    379    -42   -484   -497   -376   -396   -515   -358   -169   -248   -312 
  -217   -308   -267     30   -379   -353    -75   -272   -109   -230   -160   -226   -376    389     88   -335   -258   -298   -222   -327 
  -140   -279   -140    -99   -286     62   -149   -193    181   -214    393    102   -336    -85    -53   -218   -156   -208   -223   -221 
  -236   -316   -246   -169   -298   -302    381   -279    104   -258   -222   -149   -398    248    -27   -302   -229   -289   -209   -151 
  -230   -226   -483   -423    136   -425   -404    315   -411    176    -45   -416   -495   -386   -402   -434   -244    254   -227   -263 
   171   -100   -344   -260    139   -243   -232     54   -250    -21    292   -258   -351   -229   -239    -37   -108    196   -100   -127 
  -101    205    136   -185   -122   -250   -203    159   -177    -67    -41   -184   -339   -172   -195   -180    243    -28   -127    148 
  -275   -258   -472   -376     72   -436   -359    112   -371    347     17   -415   -440      3   -327   -440   -282   -106   -194   -253 
  -139   -145   -410   -324    -93   -313   -282    201   -310    123    361   -315   -399     94   -292   -316   -154    203   -130   -165 
  -128   -259   -132    -71   -271   -215   -103    101    -89   -198   -149    148   -319    329   -120    -48   -150   -202   -205   -222 
  -107   -275   -129    -55   -270   -205    144   -197    168   -200   -154     87   -300    261    -44   -192     69   -203   -199   -197 
  -194   -322    -70   -129   -374   -174   -166   -343   -151   -348   -313    256   -370    310   -202     -7   -196   -343   -318   -282 
  -171   -318   -232   -124   -338     57   -154   -234    241     56   -196   -171   -361    208    137   -262   -182   -244   -229   -243 
--------------------------------------------------------------------------------

--------------------------------------------------------------------------------
	Motif LQEELDRMKAENKKLRDMLSVVYENYSTLQMHVATLMQQQK MEME-8 position-specific probability matrix
--------------------------------------------------------------------------------
letter-probability matrix: alength= 20 w= 41 nsites= 8 E= 1.3e-067 
 0.000000  0.000000  0.000000  0.000000  0.000000  0.000000  0.000000  0.125000  0.000000  0.875000  0.000000  0.000000  0.000000  0.000000  0.000000  0.000000  0.000000  0.000000  0.000000  0.000000 
 0.000000  0.000000  0.000000  0.250000  0.000000  0.000000  0.000000  0.000000  0.000000  0.000000  0.125000  0.000000  0.000000  0.500000  0.000000  0.000000  0.000000  0.125000  0.000000  0.000000 
 0.125000  0.000000  0.000000  0.500000  0.000000  0.000000  0.000000  0.000000  0.000000  0.000000  0.250000  0.000000  0.000000  0.000000  0.000000  0.000000  0.000000  0.125000  0.000000  0.000000 
 0.000000  0.000000  0.000000  0.750000  0.000000  0.000000  0.000000  0.000000  0.250000  0.000000  0.000000  0.000000  0.000000  0.000000  0.000000  0.000000  0.000000  0.000000  0.000000  0.000000 
 0.000000  0.000000  0.000000  0.000000  0.000000  0.000000  0.000000  0.000000  0.000000  0.875000  0.125000  0.000000  0.000000  0.000000  0.000000  0.000000  0.000000  0.000000  0.000000  0.000000 
 0.000000  0.000000  0.250000  0.125000  0.000000  0.000000  0.000000  0.000000  0.125000  0.000000  0.000000  0.250000  0.000000  0.250000  0.000000  0.000000  0.000000  0.000000  0.000000  0.000000 
 0.000000  0.000000  0.000000  0.000000  0.000000  0.000000  0.000000  0.000000  0.000000  0.000000  0.000000  0.000000  0.000000  0.000000  1.000000  0.000000  0.000000  0.000000  0.000000  0.000000 
 0.000000  0.000000  0.000000  0.000000  0.000000  0.000000  0.000000  0.125000  0.250000  0.125000  0.375000  0.000000  0.000000  0.000000  0.000000  0.000000  0.000000  0.125000  0.000000  0.000000 
 0.000000  0.000000  0.000000  0.000000  0.000000  0.000000  0.000000  0.125000  0.375000  0.000000  0.125000  0.125000  0.000000  0.000000  0.000000  0.250000  0.000000  0.000000  0.000000  0.000000 
 0.375000  0.000000  0.000000  0.125000  0.000000  0.000000  0.000000  0.000000  0.125000  0.000000  0.000000  0.000000  0.000000  0.000000  0.000000  0.250000  0.000000  0.125000  0.000000  0.000000 
 0.000000  0.000000  0.000000  1.000000  0.000000  0.000000  0.000000  0.000000  0.000000  0.000000  0.000000  0.000000  0.000000  0.000000  0.000000  0.000000  0.000000  0.000000  0.000000  0.000000 
 0.000000  0.000000  0.000000  0.000000  0.000000  0.000000  0.000000  0.000000  0.000000  0.000000  0.000000  1.000000  0.000000  0.000000  0.000000  0.000000  0.000000  0.000000  0.000000  0.000000 
 0.000000  0.000000  0.000000  0.000000  0.000000  0.250000  0.250000  0.000000  0.250000  0.125000  0.000000  0.000000  0.000000  0.125000  0.000000  0.000000  0.000000  0.000000  0.000000  0.000000 
 0.000000  0.000000  0.000000  0.000000  0.000000  0.000000  0.000000  0.000000  0.625000  0.000000  0.125000  0.000000  0.000000  0.000000  0.250000  0.000000  0.000000  0.000000  0.000000  0.000000 
 0.000000  0.000000  0.000000  0.000000  0.000000  0.000000  0.000000  0.000000  0.000000  1.000000  0.000000  0.000000  0.000000  0.000000  0.000000  0.000000  0.000000  0.000000  0.000000  0.000000 
 0.000000  0.000000  0.000000  0.000000  0.000000  0.000000  0.000000  0.000000  0.125000  0.000000  0.000000  0.125000  0.000000  0.000000  0.375000  0.250000  0.125000  0.000000  0.000000  0.000000 
 0.000000  0.000000  0.375000  0.125000  0.000000  0.000000  0.000000  0.000000  0.125000  0.000000  0.000000  0.000000  0.000000  0.375000  0.000000  0.000000  0.000000  0.000000  0.000000  0.000000 
 0.000000  0.000000  0.000000  0.125000  0.000000  0.000000  0.000000  0.000000  0.000000  0.000000  0.875000  0.000000  0.000000  0.000000  0.000000  0.000000  0.000000  0.000000  0.000000  0.000000 
 0.000000  0.000000  0.000000  0.000000  0.000000  0.000000  0.000000  0.000000  0.000000  0.875000  0.000000  0.000000  0.000000  0.000000  0.000000  0.000000  0.000000  0.125000  0.000000  0.000000 
 0.000000  0.000000  0.000000  0.125000  0.000000  0.125000  0.000000  0.000000  0.000000  0.000000  0.000000  0.125000  0.000000  0.000000  0.250000  0.250000  0.125000  0.000000  0.000000  0.000000 
 0.125000  0.000000  0.000000  0.000000  0.000000  0.000000  0.250000  0.125000  0.000000  0.000000  0.000000  0.000000  0.000000  0.250000  0.000000  0.000000  0.000000  0.250000  0.000000  0.000000 
 0.000000  0.000000  0.000000  0.000000  0.000000  0.000000  0.000000  0.000000  0.000000  0.000000  0.250000  0.000000  0.000000  0.000000  0.000000  0.000000  0.125000  0.625000  0.000000  0.000000 
 0.000000  0.125000  0.000000  0.000000  0.000000  0.000000  0.000000  0.000000  0.000000  0.000000  0.125000  0.000000  0.000000  0.000000  0.125000  0.125000  0.125000  0.125000  0.000000  0.250000 
 0.000000  0.000000  0.000000  0.500000  0.000000  0.000000  0.000000  0.000000  0.125000  0.000000  0.000000  0.250000  0.000000  0.000000  0.000000  0.125000  0.000000  0.000000  0.000000  0.000000 
 0.000000  0.000000  0.125000  0.000000  0.000000  0.000000  0.000000  0.000000  0.250000  0.000000  0.000000  0.625000  0.000000  0.000000  0.000000  0.000000  0.000000  0.000000  0.000000  0.000000 
 0.000000  0.000000  0.000000  0.000000  0.000000  0.000000  0.000000  0.000000  0.000000  0.000000  0.000000  0.000000  0.000000  0.000000  0.000000  0.000000  0.000000  0.000000  0.000000  1.000000 
 0.000000  0.000000  0.000000  0.000000  0.000000  0.000000  0.000000  0.125000  0.000000  0.000000  0.125000  0.125000  0.000000  0.125000  0.000000  0.250000  0.125000  0.000000  0.000000  0.125000 
 0.125000  0.000000  0.125000  0.000000  0.000000  0.000000  0.000000  0.000000  0.000000  0.000000  0.000000  0.250000  0.000000  0.000000  0.000000  0.000000  0.375000  0.125000  0.000000  0.000000 
 0.000000  0.000000  0.000000  0.000000  0.000000  0.000000  0.000000  0.000000  0.000000  1.000000  0.000000  0.000000  0.000000  0.000000  0.000000  0.000000  0.000000  0.000000  0.000000  0.000000 
 0.000000  0.000000  0.000000  0.125000  0.000000  0.000000  0.000000  0.000000  0.000000  0.000000  0.000000  0.000000  0.000000  0.625000  0.250000  0.000000  0.000000  0.000000  0.000000  0.000000 
 0.000000  0.000000  0.000000  0.000000  0.000000  0.125000  0.000000  0.000000  0.250000  0.000000  0.500000  0.125000  0.000000  0.000000  0.000000  0.000000  0.000000  0.000000  0.000000  0.000000 
 0.000000  0.000000  0.000000  0.000000  0.000000  0.000000  0.500000  0.000000  0.125000  0.000000  0.000000  0.000000  0.000000  0.375000  0.000000  0.000000  0.000000  0.000000  0.000000  0.000000 
 0.000000  0.000000  0.000000  0.000000  0.125000  0.000000  0.000000  0.250000  0.000000  0.250000  0.000000  0.000000  0.000000  0.000000  0.000000  0.000000  0.000000  0.375000  0.000000  0.000000 
 0.250000  0.000000  0.000000  0.000000  0.125000  0.000000  0.000000  0.000000  0.000000  0.000000  0.250000  0.000000  0.000000  0.000000  0.000000  0.125000  0.000000  0.250000  0.000000  0.000000 
 0.000000  0.125000  0.250000  0.000000  0.000000  0.000000  0.000000  0.125000  0.000000  0.000000  0.000000  0.000000  0.000000  0.000000  0.000000  0.000000  0.375000  0.000000  0.000000  0.125000 
 0.000000  0.000000  0.000000  0.000000  0.125000  0.000000  0.000000  0.125000  0.000000  0.625000  0.000000  0.000000  0.000000  0.125000  0.000000  0.000000  0.000000  0.000000  0.000000  0.000000 
 0.000000  0.000000  0.000000  0.000000  0.000000  0.000000  0.000000  0.125000  0.000000  0.125000  0.375000  0.000000  0.000000  0.125000  0.000000  0.000000  0.000000  0.250000  0.000000  0.000000 
 0.000000  0.000000  0.000000  0.000000  0.000000  0.000000  0.000000  0.125000  0.000000  0.000000  0.000000  0.250000  0.000000  0.500000  0.000000  0.125000  0.000000  0.000000  0.000000  0.000000 
 0.000000  0.000000  0.000000  0.000000  0.000000  0.000000  0.125000  0.000000  0.250000  0.000000  0.000000  0.125000  0.000000  0.375000  0.000000  0.000000  0.125000  0.000000  0.000000  0.000000 
 0.000000  0.000000  0.000000  0.000000  0.000000  0.000000  0.000000  0.000000  0.000000  0.000000  0.000000  0.375000  0.000000  0.500000  0.000000  0.125000  0.000000  0.000000  0.000000  0.000000 
 0.000000  0.000000  0.000000  0.000000  0.000000  0.125000  0.000000  0.000000  0.375000  0.125000  0.000000  0.000000  0.000000  0.250000  0.125000  0.000000  0.000000  0.000000  0.000000  0.000000 
--------------------------------------------------------------------------------

--------------------------------------------------------------------------------
	Motif LQEELDRMKAENKKLRDMLSVVYENYSTLQMHVATLMQQQK MEME-8 regular expression
--------------------------------------------------------------------------------
L[QE][EM][EK]L[DNQ]R[MK][KS][AS]EN[GHK][KR]L[RS][DQ]ML[RS][HQV][VM]Y[EN][NK]YS[TN]L[QR][MK][HQ][VIL][AMV][TD]L[MV][QN][QK][QN][KQ]
--------------------------------------------------------------------------------


Time 825.31 secs.

********************************************************************************


********************************************************************************
MOTIF DGYRWRKYGQKAVKNSPYPR MEME-9	width =  20  sites =   7  llr = 355  E-value = 5.2e-051
********************************************************************************
--------------------------------------------------------------------------------
	Motif DGYRWRKYGQKAVKNSPYPR MEME-9 Description
--------------------------------------------------------------------------------
Simplified        A  :::1:::::::6::::::::
pos.-specific     C  :::::::::::::::::::1
probability       D  a1::::::::::::::::::
matrix            E  ::::::::::::::::::::
                  F  ::3::::::::::::::1::
                  G  :9::::::a:::::31::::
                  H  ::::::::::::::::::::
                  I  ::::::::::::3:::::::
                  K  :::3::a::3a::9:1::11
                  L  ::::::::::::::::::::
                  M  :::::::::::3::::::::
                  N  ::::::::::::::71:3::
                  P  ::::::::::::::::7:9:
                  Q  :::::::::7:::1::::::
                  R  ::14:a:::::::::::::7
                  S  :::1:::::::::::6::::
                  T  :::::::::::1::::1:::
                  V  ::::::::::::7:::::::
                  W  ::::a:::::::::::::::
                  Y  ::6::::a::::::::16::

         bits    7.0     *               
                 6.3     *               
                 5.6     *               
                 4.9     *  *            
Relative         4.2 *   ***** *         
Entropy          3.5 *** ******* ***  ***
(73.2 bits)      2.8 *** *********** ****
                 2.1 ********************
                 1.4 ********************
                 0.7 ********************
                 0.0 --------------------

Multilevel           DGYRWRKYGQKAVKNSPYPR
consensus              FK     K MI G  N  
sequence                                 
                                         
                                         
--------------------------------------------------------------------------------

--------------------------------------------------------------------------------
	Motif DGYRWRKYGQKAVKNSPYPR MEME-9 sites sorted by position p-value
--------------------------------------------------------------------------------
Sequence name             Start   P-value                    Site      
-------------             ----- ---------            --------------------
Cp4.1LG17g00040.1            11  7.33e-27 MTKTEMDHLD DGYRWRKYGQKAVKNSPYPR SYYRCTTAGC
Cp4.1LG03g05140.1           159  8.61e-26 MTKSEVDHLE DGYRWRKYGQKAVKNSPFPR YELLSVYHSN
Cp4.1LG09g02180.1           380  2.86e-24 QTTSEVDLLD DGYRWRKYGQKTVKGNPYPR ASTDQKAVIT
Cp4.1LG11g03520.1            76  1.47e-23 EPSSKVEVLD DGFKWRKYGKKMVKNSPNPR NYYKCSVEGC
Cp4.1LG07g05980.1            87  1.47e-23 KTKSEVEILD DGFKWRKYGKKMVKNSPNPR NYYKCSVEGC
Cp4.1LG01g07170.1           120  3.37e-19 TRTVTAATAE DGRAWRKYGQKAIQNKTYPK SYYRCTHKFD
Cp4.1LG19g11130.1           137  9.25e-19 ISLKTADIPA DDYSWRKYGQKAIKGGYYKC SSMRGCPARK
--------------------------------------------------------------------------------

--------------------------------------------------------------------------------
	Motif DGYRWRKYGQKAVKNSPYPR MEME-9 block diagrams
--------------------------------------------------------------------------------
SEQUENCE NAME            POSITION P-VALUE  MOTIF DIAGRAM
-------------            ----------------  -------------
Cp4.1LG17g00040.1                 7.3e-27  10_[9]_141
Cp4.1LG03g05140.1                 8.6e-26  158_[9]_22
Cp4.1LG09g02180.1                 2.9e-24  379_[9]_51
Cp4.1LG11g03520.1                 1.5e-23  75_[9]_39
Cp4.1LG07g05980.1                 1.5e-23  86_[9]_39
Cp4.1LG01g07170.1                 3.4e-19  119_[9]_122
Cp4.1LG19g11130.1                 9.2e-19  136_[9]_46
--------------------------------------------------------------------------------

--------------------------------------------------------------------------------
	Motif DGYRWRKYGQKAVKNSPYPR MEME-9 in BLOCKS format
--------------------------------------------------------------------------------
BL   MOTIF DGYRWRKYGQKAVKNSPYPR width=20 seqs=7
Cp4.1LG17g00040.1        (   11) DGYRWRKYGQKAVKNSPYPR  1 
Cp4.1LG03g05140.1        (  159) DGYRWRKYGQKAVKNSPFPR  1 
Cp4.1LG09g02180.1        (  380) DGYRWRKYGQKTVKGNPYPR  1 
Cp4.1LG11g03520.1        (   76) DGFKWRKYGKKMVKNSPNPR  1 
Cp4.1LG07g05980.1        (   87) DGFKWRKYGKKMVKNSPNPR  1 
Cp4.1LG01g07170.1        (  120) DGRAWRKYGQKAIQNKTYPK  1 
Cp4.1LG19g11130.1        (  137) DDYSWRKYGQKAIKGGYYKC  1 
//

--------------------------------------------------------------------------------

--------------------------------------------------------------------------------
	Motif DGYRWRKYGQKAVKNSPYPR MEME-9 position-specific scoring matrix
--------------------------------------------------------------------------------
log-odds matrix: alength= 20 w= 20 n= 24842 bayes= 11.6366 E= 5.2e-051 
  -310   -364    398    -98   -395   -354   -299   -339   -392   -392   -369   -112   -516   -357   -386   -404   -376   -364   -312   -351 
  -176   -321    -47   -306   -411    380   -341   -364   -313   -428   -352   -230   -446   -362   -305   -316   -342   -360   -277   -366 
  -183   -194   -304   -264    267   -321    -31   -151   -275   -153   -153   -272   -374   -270     43   -297   -256   -190     42    419 
    70   -293   -219   -119   -327   -257   -148   -226    200   -228   -192   -162   -348    -67    280    -24   -175   -238   -215   -237 
  -378   -322   -416   -406   -109   -401   -385   -325   -404   -209   -271   -402   -508   -373   -357   -488   -397   -329    688   -134 
  -330   -276   -443   -431   -435   -390   -236   -332   -138   -351   -356   -342   -424   -249    410   -445   -374   -439   -215   -382 
  -332   -351   -470   -408   -497   -439   -391   -322    389   -416   -366   -362   -502   -375    -48   -502   -375   -426   -320   -435 
  -447   -394   -515   -524    -59   -466   -257   -361   -505   -338   -369   -454   -556   -456   -457   -536   -474   -410    -88    503 
  -205   -342   -295   -347   -434    389   -374   -392   -348   -451   -382   -273   -469   -397   -336   -349   -371   -387   -300   -393 
  -229   -327   -291   -126   -391   -328   -119   -275    171   -248   -195   -214   -397    375    -31   -331   -248   -296   -237   -302 
  -332   -351   -470   -408   -497   -439   -391   -322    389   -416   -366   -362   -502   -375    -48   -502   -375   -426   -320   -435 
   313   -101   -356   -293   -238   -169   -327   -116   -301   -176    287   -304   -395   -291   -297   -174     73    -93   -224   -279 
  -159   -191   -445   -400   -256   -436   -420    272   -420   -118   -151   -435   -473   -432   -398   -462   -213    363   -347   -378 
  -305   -347   -421   -321   -476   -405   -318   -307    381   -371   -327   -316   -479    -48    -26   -447   -333   -386   -302   -391 
  -241   -318   -120   -238   -394    162   -186   -351   -266   -414   -387    368   -417   -257   -319   -241   -240   -385   -319   -325 
  -150   -241    -90   -141   -320     57   -178   -283     65   -303   -259    110   -343   -162   -187    202    -25   -301   -273   -255 
  -116   -279   -283   -246   -288   -283   -284   -237   -243   -246   -263   -297    326   -235   -261   -265     11   -242   -287     91 
  -272   -259   -374   -346    222   -384    -92   -210   -348   -201   -212    186   -445   -318   -317   -371   -324   -254     35    421 
  -122   -290   -288   -248   -322   -290   -292   -251      2   -255   -276   -306    337   -236   -258   -271   -222   -254   -315   -357 
  -311     -3   -428   -396   -424   -378   -217   -314    -49   -332   -334   -320   -411   -222    402   -425   -352   -415   -202   -366 
--------------------------------------------------------------------------------

--------------------------------------------------------------------------------
	Motif DGYRWRKYGQKAVKNSPYPR MEME-9 position-specific probability matrix
--------------------------------------------------------------------------------
letter-probability matrix: alength= 20 w= 20 nsites= 7 E= 5.2e-051 
 0.000000  0.000000  1.000000  0.000000  0.000000  0.000000  0.000000  0.000000  0.000000  0.000000  0.000000  0.000000  0.000000  0.000000  0.000000  0.000000  0.000000  0.000000  0.000000  0.000000 
 0.000000  0.000000  0.142857  0.000000  0.000000  0.857143  0.000000  0.000000  0.000000  0.000000  0.000000  0.000000  0.000000  0.000000  0.000000  0.000000  0.000000  0.000000  0.000000  0.000000 
 0.000000  0.000000  0.000000  0.000000  0.285714  0.000000  0.000000  0.000000  0.000000  0.000000  0.000000  0.000000  0.000000  0.000000  0.142857  0.000000  0.000000  0.000000  0.000000  0.571429 
 0.142857  0.000000  0.000000  0.000000  0.000000  0.000000  0.000000  0.000000  0.285714  0.000000  0.000000  0.000000  0.000000  0.000000  0.428571  0.142857  0.000000  0.000000  0.000000  0.000000 
 0.000000  0.000000  0.000000  0.000000  0.000000  0.000000  0.000000  0.000000  0.000000  0.000000  0.000000  0.000000  0.000000  0.000000  0.000000  0.000000  0.000000  0.000000  1.000000  0.000000 
 0.000000  0.000000  0.000000  0.000000  0.000000  0.000000  0.000000  0.000000  0.000000  0.000000  0.000000  0.000000  0.000000  0.000000  1.000000  0.000000  0.000000  0.000000  0.000000  0.000000 
 0.000000  0.000000  0.000000  0.000000  0.000000  0.000000  0.000000  0.000000  1.000000  0.000000  0.000000  0.000000  0.000000  0.000000  0.000000  0.000000  0.000000  0.000000  0.000000  0.000000 
 0.000000  0.000000  0.000000  0.000000  0.000000  0.000000  0.000000  0.000000  0.000000  0.000000  0.000000  0.000000  0.000000  0.000000  0.000000  0.000000  0.000000  0.000000  0.000000  1.000000 
 0.000000  0.000000  0.000000  0.000000  0.000000  1.000000  0.000000  0.000000  0.000000  0.000000  0.000000  0.000000  0.000000  0.000000  0.000000  0.000000  0.000000  0.000000  0.000000  0.000000 
 0.000000  0.000000  0.000000  0.000000  0.000000  0.000000  0.000000  0.000000  0.285714  0.000000  0.000000  0.000000  0.000000  0.714286  0.000000  0.000000  0.000000  0.000000  0.000000  0.000000 
 0.000000  0.000000  0.000000  0.000000  0.000000  0.000000  0.000000  0.000000  1.000000  0.000000  0.000000  0.000000  0.000000  0.000000  0.000000  0.000000  0.000000  0.000000  0.000000  0.000000 
 0.571429  0.000000  0.000000  0.000000  0.000000  0.000000  0.000000  0.000000  0.000000  0.000000  0.285714  0.000000  0.000000  0.000000  0.000000  0.000000  0.142857  0.000000  0.000000  0.000000 
 0.000000  0.000000  0.000000  0.000000  0.000000  0.000000  0.000000  0.285714  0.000000  0.000000  0.000000  0.000000  0.000000  0.000000  0.000000  0.000000  0.000000  0.714286  0.000000  0.000000 
 0.000000  0.000000  0.000000  0.000000  0.000000  0.000000  0.000000  0.000000  0.857143  0.000000  0.000000  0.000000  0.000000  0.142857  0.000000  0.000000  0.000000  0.000000  0.000000  0.000000 
 0.000000  0.000000  0.000000  0.000000  0.000000  0.285714  0.000000  0.000000  0.000000  0.000000  0.000000  0.714286  0.000000  0.000000  0.000000  0.000000  0.000000  0.000000  0.000000  0.000000 
 0.000000  0.000000  0.000000  0.000000  0.000000  0.142857  0.000000  0.000000  0.142857  0.000000  0.000000  0.142857  0.000000  0.000000  0.000000  0.571429  0.000000  0.000000  0.000000  0.000000 
 0.000000  0.000000  0.000000  0.000000  0.000000  0.000000  0.000000  0.000000  0.000000  0.000000  0.000000  0.000000  0.714286  0.000000  0.000000  0.000000  0.142857  0.000000  0.000000  0.142857 
 0.000000  0.000000  0.000000  0.000000  0.142857  0.000000  0.000000  0.000000  0.000000  0.000000  0.000000  0.285714  0.000000  0.000000  0.000000  0.000000  0.000000  0.000000  0.000000  0.571429 
 0.000000  0.000000  0.000000  0.000000  0.000000  0.000000  0.000000  0.000000  0.142857  0.000000  0.000000  0.000000  0.857143  0.000000  0.000000  0.000000  0.000000  0.000000  0.000000  0.000000 
 0.000000  0.142857  0.000000  0.000000  0.000000  0.000000  0.000000  0.000000  0.142857  0.000000  0.000000  0.000000  0.000000  0.000000  0.714286  0.000000  0.000000  0.000000  0.000000  0.000000 
--------------------------------------------------------------------------------

--------------------------------------------------------------------------------
	Motif DGYRWRKYGQKAVKNSPYPR MEME-9 regular expression
--------------------------------------------------------------------------------
DG[YF][RK]WRKYG[QK]K[AM][VI]K[NG]SP[YN]PR
--------------------------------------------------------------------------------


Time 894.27 secs.

********************************************************************************


********************************************************************************
MOTIF RSPCLTIPPGLSPTSLLDSPVLLSNSKV MEME-10	width =  28  sites =   7  llr = 432  E-value = 9.8e-047
********************************************************************************
--------------------------------------------------------------------------------
	Motif RSPCLTIPPGLSPTSLLDSPVLLSNSKV MEME-10 Description
--------------------------------------------------------------------------------
Simplified        A  ::::::::::::::::::::::::1::4
pos.-specific     C  :::4::::::::::::::::::::::::
probability       D  :::::::::::::::::9:::::::::1
matrix            E  ::::::::::::::1::1::::::::::
                  F  :::13::::::::::3:::::3:::1::
                  G  :::::::::a::::::::::::::::::
                  H  ::::::::::::::::::::::::::::
                  I  ::::3:a:::3:::::::::1:::::::
                  K  3:::::::::::::::::::::::::3:
                  L  :::14:::::7:::17a::::6a1:13:
                  M  ::::::::::::::::::::::::::::
                  N  ::::::::::::::::::::::::7:1:
                  P  3:7::::aa:::a::::::a::::::::
                  Q  ::::::::::::::1:::::::::::1:
                  R  4:::::::::::::::::::::::::::
                  S  :a3::1:::::a:13:::a::::416::
                  T  :::::9:::::::93::::::1:4:1::
                  V  ::::::::::::::::::::9::::::4
                  W  ::::::::::::::::::::::::::::
                  Y  :::3::::::::::::::::::::::1:

         bits    7.0                             
                 6.3                             
                 5.6                             
                 4.9       *                     
Relative         4.2       *  *      *     *     
Entropy          3.5    * ****** ** *** ** *     
(89.1 bits)      2.8 ************** ******** *  *
                 2.1 ************** *************
                 1.4 ****************************
                 0.7 ****************************
                 0.0 ----------------------------

Multilevel           RSPCLTIPPGLSPTSLLDSPVLLSNSKA
consensus            K SYF     I   TF     F T  LV
sequence             P   I                       
                                                 
                                                 
--------------------------------------------------------------------------------

--------------------------------------------------------------------------------
	Motif RSPCLTIPPGLSPTSLLDSPVLLSNSKV MEME-10 sites sorted by position p-value
--------------------------------------------------------------------------------
Sequence name             Start   P-value                        Site          
-------------             ----- ---------            ----------------------------
Cp4.1LG14g08130.1           116  3.01e-30 TENIRSTEEV KSPYLTIPPGLSPTTLLDSPVFLSNSLA QQSPTTGKFP
Cp4.1LG08g08130.1           125  3.01e-30 STDQSLDSDA KSPYLTIPPGLSPTTLLDSPVFLSNSLA QQSPTTGKFP
Cp4.1LG14g07630.1            28  2.86e-28 LMSPAKLPIF RSPCITIPPGLSPSSFLDSPVLLTNFKV EPSPTTGSFT
Cp4.1LG08g08540.1            44  8.85e-28 LLSPAKLPIS RSPCITIPPGLSPTSFLESPVLLTNLKV EPSPTTGSFT
Cp4.1LG18g02530.1            69  7.20e-26 TATPLGSPMV RSPCLTIPPGISPTLLLDSPITLLNTQD LPSPTTGTFP
Cp4.1LG05g09980.1           197  1.02e-25 LSAMSQPLFS PSSFFTIPPGISPTQLLDSPVLLTSSNA SPTTGAISTG
Cp4.1LG02g11140.1            78  1.40e-24 SLPLLPPTLI PSSLFSIPPGLSPTELLDSPVLLSASYV LPSPTTGSFP
--------------------------------------------------------------------------------

--------------------------------------------------------------------------------
	Motif RSPCLTIPPGLSPTSLLDSPVLLSNSKV MEME-10 block diagrams
--------------------------------------------------------------------------------
SEQUENCE NAME            POSITION P-VALUE  MOTIF DIAGRAM
-------------            ----------------  -------------
Cp4.1LG14g08130.1                   3e-30  115_[10]_557
Cp4.1LG08g08130.1                   3e-30  124_[10]_588
Cp4.1LG14g07630.1                 2.9e-28  27_[10]_478
Cp4.1LG08g08540.1                 8.8e-28  43_[10]_507
Cp4.1LG18g02530.1                 7.2e-26  68_[10]_678
Cp4.1LG05g09980.1                   1e-25  196_[10]_351
Cp4.1LG02g11140.1                 1.4e-24  77_[10]_445
--------------------------------------------------------------------------------

--------------------------------------------------------------------------------
	Motif RSPCLTIPPGLSPTSLLDSPVLLSNSKV MEME-10 in BLOCKS format
--------------------------------------------------------------------------------
BL   MOTIF RSPCLTIPPGLSPTSLLDSPVLLSNSKV width=28 seqs=7
Cp4.1LG14g08130.1        (  116) KSPYLTIPPGLSPTTLLDSPVFLSNSLA  1 
Cp4.1LG08g08130.1        (  125) KSPYLTIPPGLSPTTLLDSPVFLSNSLA  1 
Cp4.1LG14g07630.1        (   28) RSPCITIPPGLSPSSFLDSPVLLTNFKV  1 
Cp4.1LG08g08540.1        (   44) RSPCITIPPGLSPTSFLESPVLLTNLKV  1 
Cp4.1LG18g02530.1        (   69) RSPCLTIPPGISPTLLLDSPITLLNTQD  1 
Cp4.1LG05g09980.1        (  197) PSSFFTIPPGISPTQLLDSPVLLTSSNA  1 
Cp4.1LG02g11140.1        (   78) PSSLFSIPPGLSPTELLDSPVLLSASYV  1 
//

--------------------------------------------------------------------------------

--------------------------------------------------------------------------------
	Motif RSPCLTIPPGLSPTSLLDSPVLLSNSKV MEME-10 position-specific scoring matrix
--------------------------------------------------------------------------------
log-odds matrix: alength= 20 w= 28 n= 24226 bayes= 12.3624 E= 9.8e-047 
  -224   -334   -315   -180   -398   -307   -171   -264    213   -257   -229   -209    137    -81    284   -317   -227   -282   -242   -280 
  -185   -240   -386   -426   -390   -311   -405   -366   -385   -399   -354   -276   -440   -400   -370    285    -39   -377   -334   -375 
  -114   -271   -294   -262   -331   -275   -304   -262   -262   -268   -285   -305    324   -252   -279     19   -221   -258   -321   -364 
  -259    409   -424   -379    214   -390   -141   -113   -370     99   -137   -339   -459   -326   -335   -387   -287   -170     13    338 
  -312   -284   -592   -504    270   -507   -436    284   -497    277      7   -511   -537   -403   -450   -534   -325    -95   -195   -252 
  -173   -187   -331   -350   -317   -336   -327   -165   -288   -299   -179   -183   -409   -269   -288      1    368   -174   -262   -347 
  -294   -292   -454   -438   -243   -449   -469    455   -417    -43    -92   -425   -532   -434   -438   -469   -294     70   -301   -310 
  -204   -353   -365   -335   -391   -350   -367   -332   -333   -334   -358   -387    357   -322   -346   -353   -303   -335   -362   -419 
  -204   -353   -365   -335   -391   -350   -367   -332   -333   -334   -358   -387    357   -322   -346   -353   -303   -335   -362   -419 
  -205   -342   -295   -347   -434    389   -374   -392   -348   -451   -382   -273   -469   -397   -336   -349   -371   -387   -300   -393 
  -305   -277   -538   -446   -110   -490   -420    253   -442    341      5   -478   -497   -366   -397   -507   -315    -77   -213   -282 
  -185   -240   -386   -426   -390   -311   -405   -366   -385   -399   -354   -276   -440   -400   -370    285    -39   -377   -334   -375 
  -204   -353   -365   -335   -391   -350   -367   -332   -333   -334   -358   -387    357   -322   -346   -353   -303   -335   -362   -419 
  -173   -187   -331   -350   -317   -336   -327   -165   -288   -299   -179   -183   -409   -269   -288      1    368   -174   -262   -347 
   -66   -214   -104     97   -216   -185   -114   -136    -34     39   -115    -86   -268    110    -79     85    180   -147   -171   -166 
  -330   -298   -554   -466    245   -501   -390     -7   -459    341      6   -487   -509   -372   -407   -524   -340   -130   -174   -188 
  -330   -306   -509   -430   -148   -464   -407    -43   -424    377    -25   -467   -481   -358   -378   -497   -340   -151   -232   -294 
  -289   -352    392    -24   -381   -342   -282   -321   -366   -375   -349    -93   -502   -327   -368   -386   -357   -344   -300   -337 
  -185   -240   -386   -426   -390   -311   -405   -366   -385   -399   -354   -276   -440   -400   -370    285    -39   -377   -334   -375 
  -204   -353   -365   -335   -391   -350   -367   -332   -333   -334   -358   -387    357   -322   -346   -353   -303   -335   -362   -419 
  -113   -168   -396   -351   -250   -396   -362    177   -375   -130   -155   -397   -425   -386   -342   -421   -180    381   -314   -371 
  -252   -241   -485   -397    231   -421   -349     10   -387    320     10   -412   -458   -327   -351   -429     54    -87   -163   -185 
  -330   -306   -509   -430   -148   -464   -407    -43   -424    377    -25   -467   -481   -358   -378   -497   -340   -151   -232   -294 
  -138   -165   -312   -324   -287   -292   -313   -187   -269    -38   -196   -174   -376   -277   -266    193    258   -214   -247   -293 
   -47   -273   -181   -310   -343   -264   -135   -254   -284   -352   -307    390   -415   -255   -316   -108   -224   -317   -247   -312 
  -125   -150   -303   -310      3   -279   -297   -164   -258    -58   -178   -169   -357   -281   -252    238    127   -211   -217   -239 
   -80   -240   -123    -40   -211   -192   -104   -142    182    144   -119     97   -279    129    -29   -174   -102   -154   -166    161 
   251   -132     50   -180   -240   -209   -293    -24   -260   -166   -152   -263   -380   -249   -274   -217   -159    276   -239   -280 
--------------------------------------------------------------------------------

--------------------------------------------------------------------------------
	Motif RSPCLTIPPGLSPTSLLDSPVLLSNSKV MEME-10 position-specific probability matrix
--------------------------------------------------------------------------------
letter-probability matrix: alength= 20 w= 28 nsites= 7 E= 9.8e-047 
 0.000000  0.000000  0.000000  0.000000  0.000000  0.000000  0.000000  0.000000  0.285714  0.000000  0.000000  0.000000  0.285714  0.000000  0.428571  0.000000  0.000000  0.000000  0.000000  0.000000 
 0.000000  0.000000  0.000000  0.000000  0.000000  0.000000  0.000000  0.000000  0.000000  0.000000  0.000000  0.000000  0.000000  0.000000  0.000000  1.000000  0.000000  0.000000  0.000000  0.000000 
 0.000000  0.000000  0.000000  0.000000  0.000000  0.000000  0.000000  0.000000  0.000000  0.000000  0.000000  0.000000  0.714286  0.000000  0.000000  0.285714  0.000000  0.000000  0.000000  0.000000 
 0.000000  0.428571  0.000000  0.000000  0.142857  0.000000  0.000000  0.000000  0.000000  0.142857  0.000000  0.000000  0.000000  0.000000  0.000000  0.000000  0.000000  0.000000  0.000000  0.285714 
 0.000000  0.000000  0.000000  0.000000  0.285714  0.000000  0.000000  0.285714  0.000000  0.428571  0.000000  0.000000  0.000000  0.000000  0.000000  0.000000  0.000000  0.000000  0.000000  0.000000 
 0.000000  0.000000  0.000000  0.000000  0.000000  0.000000  0.000000  0.000000  0.000000  0.000000  0.000000  0.000000  0.000000  0.000000  0.000000  0.142857  0.857143  0.000000  0.000000  0.000000 
 0.000000  0.000000  0.000000  0.000000  0.000000  0.000000  0.000000  1.000000  0.000000  0.000000  0.000000  0.000000  0.000000  0.000000  0.000000  0.000000  0.000000  0.000000  0.000000  0.000000 
 0.000000  0.000000  0.000000  0.000000  0.000000  0.000000  0.000000  0.000000  0.000000  0.000000  0.000000  0.000000  1.000000  0.000000  0.000000  0.000000  0.000000  0.000000  0.000000  0.000000 
 0.000000  0.000000  0.000000  0.000000  0.000000  0.000000  0.000000  0.000000  0.000000  0.000000  0.000000  0.000000  1.000000  0.000000  0.000000  0.000000  0.000000  0.000000  0.000000  0.000000 
 0.000000  0.000000  0.000000  0.000000  0.000000  1.000000  0.000000  0.000000  0.000000  0.000000  0.000000  0.000000  0.000000  0.000000  0.000000  0.000000  0.000000  0.000000  0.000000  0.000000 
 0.000000  0.000000  0.000000  0.000000  0.000000  0.000000  0.000000  0.285714  0.000000  0.714286  0.000000  0.000000  0.000000  0.000000  0.000000  0.000000  0.000000  0.000000  0.000000  0.000000 
 0.000000  0.000000  0.000000  0.000000  0.000000  0.000000  0.000000  0.000000  0.000000  0.000000  0.000000  0.000000  0.000000  0.000000  0.000000  1.000000  0.000000  0.000000  0.000000  0.000000 
 0.000000  0.000000  0.000000  0.000000  0.000000  0.000000  0.000000  0.000000  0.000000  0.000000  0.000000  0.000000  1.000000  0.000000  0.000000  0.000000  0.000000  0.000000  0.000000  0.000000 
 0.000000  0.000000  0.000000  0.000000  0.000000  0.000000  0.000000  0.000000  0.000000  0.000000  0.000000  0.000000  0.000000  0.000000  0.000000  0.142857  0.857143  0.000000  0.000000  0.000000 
 0.000000  0.000000  0.000000  0.142857  0.000000  0.000000  0.000000  0.000000  0.000000  0.142857  0.000000  0.000000  0.000000  0.142857  0.000000  0.285714  0.285714  0.000000  0.000000  0.000000 
 0.000000  0.000000  0.000000  0.000000  0.285714  0.000000  0.000000  0.000000  0.000000  0.714286  0.000000  0.000000  0.000000  0.000000  0.000000  0.000000  0.000000  0.000000  0.000000  0.000000 
 0.000000  0.000000  0.000000  0.000000  0.000000  0.000000  0.000000  0.000000  0.000000  1.000000  0.000000  0.000000  0.000000  0.000000  0.000000  0.000000  0.000000  0.000000  0.000000  0.000000 
 0.000000  0.000000  0.857143  0.142857  0.000000  0.000000  0.000000  0.000000  0.000000  0.000000  0.000000  0.000000  0.000000  0.000000  0.000000  0.000000  0.000000  0.000000  0.000000  0.000000 
 0.000000  0.000000  0.000000  0.000000  0.000000  0.000000  0.000000  0.000000  0.000000  0.000000  0.000000  0.000000  0.000000  0.000000  0.000000  1.000000  0.000000  0.000000  0.000000  0.000000 
 0.000000  0.000000  0.000000  0.000000  0.000000  0.000000  0.000000  0.000000  0.000000  0.000000  0.000000  0.000000  1.000000  0.000000  0.000000  0.000000  0.000000  0.000000  0.000000  0.000000 
 0.000000  0.000000  0.000000  0.000000  0.000000  0.000000  0.000000  0.142857  0.000000  0.000000  0.000000  0.000000  0.000000  0.000000  0.000000  0.000000  0.000000  0.857143  0.000000  0.000000 
 0.000000  0.000000  0.000000  0.000000  0.285714  0.000000  0.000000  0.000000  0.000000  0.571429  0.000000  0.000000  0.000000  0.000000  0.000000  0.000000  0.142857  0.000000  0.000000  0.000000 
 0.000000  0.000000  0.000000  0.000000  0.000000  0.000000  0.000000  0.000000  0.000000  1.000000  0.000000  0.000000  0.000000  0.000000  0.000000  0.000000  0.000000  0.000000  0.000000  0.000000 
 0.000000  0.000000  0.000000  0.000000  0.000000  0.000000  0.000000  0.000000  0.000000  0.142857  0.000000  0.000000  0.000000  0.000000  0.000000  0.428571  0.428571  0.000000  0.000000  0.000000 
 0.142857  0.000000  0.000000  0.000000  0.000000  0.000000  0.000000  0.000000  0.000000  0.000000  0.000000  0.714286  0.000000  0.000000  0.000000  0.142857  0.000000  0.000000  0.000000  0.000000 
 0.000000  0.000000  0.000000  0.000000  0.142857  0.000000  0.000000  0.000000  0.000000  0.142857  0.000000  0.000000  0.000000  0.000000  0.000000  0.571429  0.142857  0.000000  0.000000  0.000000 
 0.000000  0.000000  0.000000  0.000000  0.000000  0.000000  0.000000  0.000000  0.285714  0.285714  0.000000  0.142857  0.000000  0.142857  0.000000  0.000000  0.000000  0.000000  0.000000  0.142857 
 0.428571  0.000000  0.142857  0.000000  0.000000  0.000000  0.000000  0.000000  0.000000  0.000000  0.000000  0.000000  0.000000  0.000000  0.000000  0.000000  0.000000  0.428571  0.000000  0.000000 
--------------------------------------------------------------------------------

--------------------------------------------------------------------------------
	Motif RSPCLTIPPGLSPTSLLDSPVLLSNSKV MEME-10 regular expression
--------------------------------------------------------------------------------
[RKP]S[PS][CY][LFI]TIPPG[LI]SPT[ST][LF]LDSPV[LF]L[ST]NS[KL][AV]
--------------------------------------------------------------------------------


Time 962.75 secs.

********************************************************************************


********************************************************************************
SUMMARY OF MOTIFS
********************************************************************************

--------------------------------------------------------------------------------
	Combined block diagrams: non-overlapping sites with p-value < 0.0001
--------------------------------------------------------------------------------
SEQUENCE NAME            COMBINED P-VALUE  MOTIF DIAGRAM
-------------            ----------------  -------------
Cp4.1LG00g01540.1                1.39e-75  74_[1(1.05e-31)]_3_[2(3.05e-16)]_\
    146_[3(5.94e-16)]_[1(2.46e-32)]_3_[2(8.54e-20)]_[5(2.58e-13)]_143
Cp4.1LG01g01970.1                2.03e-94  71_[8(4.97e-27)]_62_[8(3.74e-05)]_3_\
    [3(5.14e-05)]_[1(5.02e-29)]_4_[2(5.81e-22)]_[5(1.14e-11)]_98_[7(6.62e-21)]_\
    46
Cp4.1LG01g00360.1                1.11e-47  101_[4(3.14e-05)]_2_[1(2.57e-28)]_6_\
    [2(1.29e-17)]_36_[3(2.36e-05)]_115
Cp4.1LG01g00130.1                2.10e-64  85_[3(6.37e-15)]_[1(3.16e-29)]_3_\
    [2(1.58e-17)]_[5(1.83e-08)]_13
Cp4.1LG01g00250.1                5.72e-52  81_[1(3.55e-29)]_4_[2(5.52e-18)]_\
    [5(1.38e-09)]_68
Cp4.1LG01g07170.1                5.65e-33  48_[6(6.38e-06)]_50_[1(5.17e-21)]_6_\
    [2(5.09e-07)]_89
Cp4.1LG01g12160.1                1.76e-76  54_[7(7.78e-05)]_121_[1(1.56e-29)]_\
    3_[2(2.63e-17)]_105_[3(6.96e-16)]_[1(8.09e-33)]_3_[2(2.65e-20)]_\
    [5(1.19e-12)]_42
Cp4.1LG02g06760.1                2.96e-98  35_[6(2.76e-13)]_22_[6(3.70e-17)]_\
    183_[4(6.14e-34)]_1_[1(9.46e-30)]_4_[2(8.32e-24)]_[5(1.53e-08)]_6
Cp4.1LG02g05340.1                1.02e-97  57_[8(2.72e-34)]_67_[1(4.37e-26)]_4_\
    [2(4.81e-20)]_[5(1.83e-08)]_57_[7(4.57e-25)]_8
Cp4.1LG02g04820.1                5.27e-97  16_[6(9.96e-15)]_8_[6(7.96e-19)]_\
    173_[4(7.77e-34)]_1_[1(4.36e-30)]_4_[2(9.82e-20)]_[5(3.79e-09)]_11
Cp4.1LG02g11140.1                5.42e-97  77_[10(1.40e-24)]_99_[1(9.24e-31)]_\
    3_[2(9.25e-17)]_100_[3(4.30e-20)]_[1(2.46e-32)]_3_[2(1.03e-20)]_\
    [5(3.31e-12)]_111
Cp4.1LG02g16210.1                2.18e-52  28_[4(2.50e-07)]_10_[1(1.56e-29)]_4_\
    [2(7.62e-18)]_[5(1.16e-05)]_104
Cp4.1LG02g15110.1               3.66e-107  51_[8(7.42e-33)]_68_[1(5.44e-27)]_4_\
    [2(7.86e-19)]_[5(8.78e-11)]_45_[7(1.88e-33)]_3
Cp4.1LG03g03290.1                4.90e-78  42_[10(5.90e-07)]_99_[1(9.24e-31)]_\
    3_[2(9.25e-17)]_79_[3(2.08e-17)]_[1(2.46e-32)]_3_[2(6.15e-19)]_\
    [5(2.58e-13)]_92
Cp4.1LG03g02050.1                7.94e-55  196_[1(2.60e-31)]_3_[2(2.90e-17)]_\
    145_[1(1.06e-27)]_3_[2(6.15e-18)]_[5(1.53e-09)]_6
Cp4.1LG03g06840.1                2.52e-69  73_[3(6.95e-19)]_[1(1.43e-30)]_3_\
    [2(1.62e-16)]_[5(2.20e-07)]_14
Cp4.1LG03g05140.1                2.11e-43  138_[3(1.17e-19)]_[9(8.61e-26)]_22
Cp4.1LG03g08890.1                6.83e-90  73_[1(5.44e-27)]_4_[2(1.43e-18)]_\
    [5(8.91e-09)]_43_[7(1.88e-33)]_3
Cp4.1LG03g12920.1                9.49e-67  69_[3(9.54e-16)]_[1(7.33e-30)]_3_\
    [2(1.77e-16)]_[5(1.90e-07)]_13
Cp4.1LG03g11900.1                4.40e-82  125_[3(9.63e-22)]_[1(1.49e-32)]_3_\
    [2(8.87e-19)]_[5(2.03e-11)]_92
Cp4.1LG03g15600.1                2.14e-71  121_[3(2.71e-20)]_[1(1.22e-29)]_3_\
    [2(2.88e-19)]_[5(2.55e-07)]_8
Cp4.1LG04g03970.1                2.26e-67  110_[1(6.46e-28)]_3_[2(6.83e-14)]_\
    103_[3(4.74e-14)]_[1(1.07e-30)]_3_[2(1.42e-20)]_[5(2.82e-09)]_77
Cp4.1LG04g02780.1                1.86e-52  32_[9(8.97e-06)]_14_[1(1.38e-29)]_4_\
    [2(5.43e-19)]_[5(8.91e-09)]_142
Cp4.1LG04g02450.1                3.17e-82  86_[3(2.01e-19)]_[1(1.49e-32)]_3_\
    [2(2.54e-18)]_[5(4.57e-12)]_2_[7(3.37e-05)]_39
Cp4.1LG04g13250.1                8.09e-91  17_[6(1.84e-13)]_11_[6(4.56e-16)]_\
    106_[4(2.35e-28)]_1_[1(3.33e-30)]_4_[2(7.43e-21)]_[5(1.52e-07)]_12
Cp4.1LG05g01350.1                6.36e-91  3_[6(3.08e-15)]_7_[6(2.52e-14)]_130_\
    [4(1.51e-31)]_1_[1(1.38e-29)]_4_[2(4.16e-20)]_[5(1.12e-09)]_6
Cp4.1LG05g06330.1                1.62e-55  12_[7(2.95e-05)]_128_[1(2.50e-29)]_\
    4_[2(1.80e-18)]_[5(2.63e-10)]_94
Cp4.1LG05g09980.1                1.45e-94  33_[8(2.57e-07)]_122_[10(1.02e-25)]_\
    89_[1(4.36e-30)]_3_[2(1.02e-16)]_83_[3(1.07e-16)]_17_[2(4.22e-19)]_\
    [5(3.86e-13)]_56
Cp4.1LG05g11790.1               2.78e-105  22_[6(1.09e-15)]_9_[6(3.02e-20)]_\
    103_[4(3.19e-34)]_1_[1(2.89e-30)]_4_[2(4.09e-23)]_[5(4.67e-10)]_6
Cp4.1LG06g01700.1                4.72e-97  37_[6(5.14e-14)]_22_[6(6.36e-16)]_\
    181_[4(6.14e-34)]_1_[1(9.46e-30)]_4_[2(8.32e-24)]_[5(4.28e-08)]_6
Cp4.1LG06g03010.1                3.33e-99  36_[8(1.50e-35)]_68_[1(4.37e-26)]_4_\
    [2(1.48e-19)]_[5(5.84e-10)]_57_[7(1.95e-24)]_6
Cp4.1LG06g04620.1                6.41e-89  16_[6(9.81e-16)]_8_[6(4.08e-16)]_\
    168_[4(1.36e-31)]_1_[1(9.80e-29)]_4_[2(1.70e-19)]_[5(8.85e-08)]_11
Cp4.1LG07g00870.1                6.61e-81  24_[3(3.39e-22)]_[1(1.05e-31)]_3_\
    [2(3.15e-21)]_[5(1.17e-08)]_75
Cp4.1LG07g03150.1                2.32e-91  41_[8(8.78e-30)]_66_[1(7.89e-28)]_4_\
    [2(1.02e-16)]_[5(2.82e-08)]_60_[7(2.57e-23)]_7
Cp4.1LG07g05980.1                6.59e-61  66_[3(2.27e-13)]_[1(1.50e-26)]_3_\
    [2(4.47e-21)]_9
Cp4.1LG08g05270.1                9.78e-81  144_[3(3.41e-20)]_[1(1.49e-32)]_3_\
    [2(1.13e-19)]_[5(1.76e-11)]_94
Cp4.1LG08g01440.1                9.61e-56  159_[1(1.98e-29)]_4_[2(8.87e-19)]_\
    [5(7.27e-10)]_108
Cp4.1LG08g00890.1                4.69e-43  36_[6(9.51e-05)]_26_[4(3.31e-06)]_2_\
    [1(1.14e-26)]_6_[2(1.87e-15)]_72_[7(3.60e-05)]_64
Cp4.1LG08g08130.1               1.16e-104  124_[10(3.01e-30)]_170_\
    [1(1.05e-31)]_3_[2(9.25e-17)]_145_[3(6.29e-21)]_[1(2.46e-32)]_3_\
    [2(3.27e-19)]_[5(1.45e-15)]_138
Cp4.1LG08g08540.1               1.22e-100  43_[10(8.85e-28)]_151_[1(2.18e-30)]_\
    3_[2(6.89e-15)]_106_[3(2.40e-20)]_[1(1.07e-30)]_3_[2(8.39e-23)]_\
    [5(6.95e-14)]_115
Cp4.1LG09g02180.1                1.88e-74  54_[7(8.03e-05)]_117_[1(4.92e-31)]_\
    3_[2(3.18e-18)]_109_[3(1.11e-15)]_[9(2.86e-24)]_12_[5(1.19e-12)]_24
Cp4.1LG09g07110.1                4.54e-57  154_[4(4.26e-08)]_7_[1(3.55e-29)]_4_\
    [2(3.72e-19)]_[5(3.32e-10)]_131
Cp4.1LG10g05720.1                3.24e-84  99_[3(9.25e-23)]_[1(2.51e-30)]_3_\
    [2(7.09e-22)]_[5(1.09e-13)]_82
Cp4.1LG10g03040.1                3.02e-70  3_[8(1.77e-05)]_79_[3(9.39e-19)]_\
    [1(1.09e-28)]_3_[2(8.76e-21)]_26
Cp4.1LG10g02340.1               4.91e-101  22_[6(2.76e-13)]_26_[6(2.20e-21)]_\
    122_[4(3.64e-34)]_1_[1(9.46e-30)]_4_[2(4.16e-20)]_[5(3.12e-09)]_6
Cp4.1LG10g09790.1               1.09e-117  150_[8(2.95e-42)]_135_[3(2.45e-05)]_\
    [1(2.81e-29)]_4_[2(2.27e-20)]_[5(4.69e-13)]_135_[7(1.97e-29)]_37
Cp4.1LG10g08390.1                1.01e-49  129_[1(5.02e-29)]_3_[2(1.60e-18)]_\
    117
Cp4.1LG11g03520.1                1.96e-51  75_[1(1.50e-26)]_3_[2(2.64e-21)]_9
Cp4.1LG11g03940.1                8.08e-77  135_[3(3.39e-22)]_[1(1.89e-30)]_3_\
    [2(2.64e-21)]_[5(1.17e-08)]_94
Cp4.1LG12g03320.1                1.03e-85  112_[3(5.25e-25)]_[1(1.49e-32)]_3_\
    [2(1.21e-20)]_[5(1.84e-10)]_76
Cp4.1LG12g04760.1                3.09e-41  2_[8(6.12e-05)]_15_[4(9.99e-05)]_6_\
    [1(1.96e-26)]_6_[2(1.45e-15)]_136
Cp4.1LG12g06240.1                7.11e-81  111_[3(2.40e-20)]_[1(1.49e-32)]_3_\
    [2(6.15e-19)]_[5(2.95e-10)]_97
Cp4.1LG13g02760.1                3.80e-55  178_[1(2.50e-29)]_4_[2(1.16e-17)]_\
    [5(1.84e-10)]_98
Cp4.1LG14g06650.1                1.36e-40  54_[6(1.10e-05)]_61_[1(8.78e-26)]_6_\
    [2(6.96e-17)]_191
Cp4.1LG14g02520.1                4.93e-47  100_[4(5.15e-05)]_2_[1(6.46e-28)]_6_\
    [2(3.20e-17)]_25_[5(2.69e-05)]_129
Cp4.1LG14g02220.1                2.27e-54  48_[7(8.28e-05)]_74_[7(8.28e-05)]_\
    42_[1(3.55e-29)]_4_[2(3.98e-18)]_[5(1.38e-09)]_55
Cp4.1LG14g07630.1                8.77e-99  27_[10(2.86e-28)]_151_[1(2.18e-30)]_\
    3_[2(9.45e-15)]_102_[3(3.04e-20)]_11_[2(8.39e-23)]_[5(6.95e-14)]_108
Cp4.1LG14g08130.1               7.65e-105  115_[10(3.01e-30)]_160_\
    [1(1.05e-31)]_3_[2(3.53e-17)]_121_[3(6.29e-21)]_[1(2.46e-32)]_3_\
    [2(3.27e-19)]_[5(1.45e-15)]_141
Cp4.1LG15g00430.1               1.47e-100  3_[6(1.45e-14)]_12_[6(5.07e-15)]_\
    156_[4(8.82e-34)]_1_[1(9.46e-30)]_4_[2(1.29e-24)]_[5(3.32e-10)]_1
Cp4.1LG15g07340.1               1.57e-106  108_[8(1.34e-34)]_111_[3(2.73e-05)]_\
    [1(2.81e-29)]_4_[2(6.28e-21)]_[5(4.69e-13)]_120_[7(3.07e-23)]_26
Cp4.1LG15g08170.1                1.50e-52  75_[1(1.38e-29)]_4_[2(5.43e-19)]_\
    [5(8.12e-09)]_154
Cp4.1LG15g08740.1                2.02e-86  136_[3(8.08e-21)]_[1(1.49e-32)]_3_\
    [2(8.54e-20)]_[5(4.32e-14)]_70
Cp4.1LG16g00060.1                1.01e-65  124_[3(4.01e-18)]_[1(1.87e-28)]_3_\
    [2(1.67e-20)]_[5(8.35e-05)]_11
Cp4.1LG16g01500.1               6.67e-104  22_[6(4.31e-14)]_9_[6(1.73e-18)]_\
    107_[4(4.73e-34)]_1_[1(2.89e-30)]_4_[2(2.47e-23)]_[5(4.67e-10)]_6
Cp4.1LG16g07300.1                5.83e-77  111_[3(1.07e-16)]_[1(1.56e-31)]_3_\
    [2(1.13e-18)]_[5(1.42e-12)]_53
Cp4.1LG17g00040.1                1.84e-68  10_[1(1.49e-32)]_3_[2(1.21e-20)]_\
    [5(2.81e-12)]_96
Cp4.1LG17g07650.1                2.80e-81  18_[3(1.49e-16)]_[1(1.49e-32)]_3_\
    [2(1.03e-20)]_[5(6.80e-11)]_46
Cp4.1LG17g06230.1                1.19e-94  3_[6(5.61e-14)]_13_[6(2.05e-15)]_\
    184_[4(3.64e-34)]_1_[1(9.46e-30)]_4_[2(1.95e-20)]_[5(3.12e-09)]_1
Cp4.1LG17g10220.1                1.68e-42  161_[1(1.96e-26)]_6_[2(1.23e-16)]_\
    125
Cp4.1LG18g02530.1                1.67e-97  68_[10(7.20e-26)]_163_[1(1.05e-31)]_\
    3_[2(2.15e-17)]_155_[3(3.52e-17)]_[1(2.46e-32)]_3_[2(2.88e-19)]_\
    [5(2.01e-15)]_225
Cp4.1LG18g05560.1                9.73e-54  195_[1(5.62e-25)]_3_[2(9.87e-07)]_\
    103_[3(1.47e-05)]_[1(2.60e-31)]_3_[2(3.98e-16)]_[5(4.20e-07)]_73
Cp4.1LG18g06480.1                4.66e-72  5_[4(5.03e-21)]_1_[1(3.33e-30)]_4_\
    [2(6.95e-19)]_[5(5.05e-08)]_8
Cp4.1LG19g11800.1                3.00e-58  73_[3(2.87e-11)]_[1(6.77e-26)]_3_\
    [2(1.43e-18)]_[5(1.40e-08)]_21
Cp4.1LG19g11130.1                1.52e-78  23_[6(1.93e-05)]_18_[6(1.65e-12)]_\
    23_[4(4.51e-31)]_1_[9(9.25e-19)]_5_[2(1.03e-20)]_[5(5.22e-10)]_5
Cp4.1LG19g07870.1               2.45e-116  151_[8(3.20e-41)]_135_[3(2.45e-05)]_\
    [1(2.81e-29)]_4_[2(2.27e-20)]_[5(4.69e-13)]_139_[7(1.97e-29)]_40
Cp4.1LG20g01990.1                2.09e-73  151_[1(5.02e-29)]_4_[2(3.76e-21)]_\
    [5(1.42e-12)]_114_[8(9.02e-05)]_3_[7(5.30e-22)]_88
Cp4.1LG20g04680.1                8.11e-50  73_[1(2.22e-29)]_4_[2(1.80e-18)]_\
    [5(3.63e-08)]_135
--------------------------------------------------------------------------------

********************************************************************************


********************************************************************************
Stopped because requested number of motifs (10) found.
********************************************************************************

CPU: 65a42543d42d

********************************************************************************
