# Supplementary material for: Genome-Wide Identification of the WRKY Gene Family and Functional Characterization of CpWRKY5 in Cucurbita pepo
Source: Int J Mol Sci. 2024 Apr 10;25(8):4177. doi: 10.3390/ijms25084177 (PMC11049939; doi:10.3390/ijms25084177)
Supplement: Supplementary file 1 [file ijms-25-04177-s001.zip › Table S3. Synteny analysis of WRKY gene in Cucurbita pepo.xlsx]

## Sheet: Sheet1
Table S3. Synteny analysis of WRKY gene in Cucurbita pepo
Chro	start site	end site	gene ID
Cp4.1LG04	7578058	7580385	Cp4LG04g02780
Cp4.1LG05	8145093	8147260	Cp4LG05g11790
Cp4.1LG01	8901402	8904724	Cp4LG01g12160
Cp4.1LG12	2190645	2192926	Cp4LG12g03320
Cp4.1LG04	10951905	10953532	Cp4LG04g13250
Cp4.1LG15	343905	346634	Cp4.1LG15g00430
Cp4.1LG07	389969	391304	Cp4.1LG07g00870
Cp4.1LG17	448267	448782	Cp4.1LG17g00040
Cp4.1LG03	10730902	10732156	Cp4.1LG03g11900
Cp4.1LG10	2618206	2619978	Cp4.1LG10g02340
Cp4.1LG02	1739851	1742754	Cp4.1LG02g05340
Cp4.1LG10	4413950	4416635	Cp4.1LG10g09790
Cp4.1LG06	949236	953293	Cp4.1LG06g01700
Cp4.1LG10	2206612	2207614	Cp4.1LG10g03040
Cp4.1LG15	8165599	8169020	Cp4.1LG15g08170
Cp4.1LG15	8508582	8510036	Cp4.1LG15g08740
Cp4.1LG06	2231470	2233236	Cp4.1LG06g04620
Cp4.1LG08	939405	941099	Cp4.1LG08g05270
Cp4.1LG19	5145825	5146696	Cp4.1LG19g11130
Cp4.1LG14	6036846	6044372	Cp4.1LG14g07630
Cp4.1LG09	1176967	1181374	Cp4.1LG09g02180
Cp4.1LG03	5849672	5850891	Cp4.1LG03g08890
Cp4.1LG07	2088381	2090626	Cp4.1LG07g03150
Cp4.1LG04	7845052	7845905	Cp4.1LG04g02450
Cp4.1LG08	6729186	6736106	Cp4.1LG08g08540
Cp4.1LG10	689343	691269	Cp4.1LG10g05720
Cp4.1LG05	230004	231599	Cp4.1LG05g01350
Cp4.1LG13	2202479	2203743	Cp4.1LG13g02760
Cp4.1LG14	6556851	6560228	Cp4.1LG14g08130
Cp4.1LG11	2106104	2109736	Cp4.1LG11g03940
Cp4.1LG01	3617204	3620186	Cp4.1LG01g00360
Cp4.1LG06	1636222	1638151	Cp4.1LG06g03010
Cp4.1LG17	5848872	5849754	Cp4.1LG17g07650
Cp4.1LG14	3117647	3119283	Cp4.1LG14g02220
Cp4.1LG02	2230984	2233174	Cp4.1LG02g04820
Cp4.1LG19	6777505	6780568	Cp4.1LG19g07870
Cp4.1LG02	13545236	13547323	Cp4.1LG02g15110
Cp4.1LG01	3762476	3763465	Cp4.1LG01g00250
Cp4.1LG05	3893194	3894413	Cp4.1LG05g06330
Cp4.1LG12	4526946	4528214	Cp4.1LG12g04760
Cp4.1LG16	7390912	7392379	Cp4.1LG16g07300
Cp4.1LG16	726252	728718	Cp4.1LG16g00060
Cp4.1LG08	6472290	6476034	Cp4.1LG08g08130
Cp4.1LG16	3550772	3552888	Cp4.1LG16g01500
Cp4.1LG17	7738539	7740520	Cp4.1LG17g10220
Cp4.1LG18	6631860	6633032	Cp4.1LG18g06480
Cp4.1LG12	7677612	7678699	Cp4.1LG12g06240
Cp4.1LG14	2948856	2950335	Cp4.1LG14g02520
Cp4.1LG02	1008099	1011234	Cp4.1LG02g06760
