# Supplementary material for: Genome-Wide Identification of the WRKY Gene Family and Functional Characterization of CpWRKY5 in Cucurbita pepo
Source: Int J Mol Sci. 2024 Apr 10;25(8):4177. doi: 10.3390/ijms25084177 (PMC11049939; doi:10.3390/ijms25084177)
Supplement: Supplementary file 1 [file ijms-25-04177-s001.zip › Table S4. Synteny analysis of WRKY genes in Cucurbita pepo, Cucumis sativus and Cucumis melo.xlsx]

## Sheet: Sheet1
Table S4. Synteny analysis of WRKY genes in Cucurbita pepo, Cucumis sativus and Cucumis melo
Cucumis sativus	Cucurbita pepo	Cucumis melo
CsaV3_1G004720	Cp4.1LG02g11140	MELO3C019494
CsaV3_1G032000	Cp4.1LG04g13250	MELO3C016281
CsaV3_1G037680	Cp4.1LG09g07110	MELO3C016337
CsaV3_1G044520	Cp4.1LG18g02530	MELO3C016338
CsaV3_1G028960	Cp4.1LG18g05560	MELO3C012130
CsaV3_1G007870	Cp4.1LG20g01990	MELO3C003622
CsaV3_1G033110	Cp4.1LG20g04680	MELO3C026740
CsaV3_2G032460	Cp4.1LG07g03150	MELO3C016966
CsaV3_2G017760	Cp4.1LG16g00060	MELO3C017912
CsaV3_2G035630	Cp4.1LG16g01500	MELO3C009127
CsaV3_3G018790	Cp4.1LG01g01970	MELO3C009302
CsaV3_3G047140	Cp4.1LG02g04820	MELO3C006725
CsaV3_3G007160	Cp4.1LG03g15600	MELO3C005937
CsaV3_3G015290	Cp4.1LG03g11900	MELO3C014896
CsaV3_3G033350	Cp4.1LG03g03290	MELO3C017743
CsaV3_3G035430	Cp4.1LG03g02050	MELO3C024209
CsaV3_3G026920	Cp4.1LG03g06840	MELO3C018717
CsaV3_3G003840	Cp4.1LG08g08130	MELO3C017415
CsaV3_3G004410	Cp4.1LG08g08540	MELO3C005843
CsaV3_3G008170	Cp4.1LG08g00890	MELO3C016966
CsaV3_3G008610	Cp4.1LG08g01440	MELO3C011295
CsaV3_3G015290	Cp4.1LG08g05270	MELO3C011432
CsaV3_4G006110	Cp4.1LG01g00250	MELO3C006725
CsaV3_4G006120	Cp4.1LG01g00130	MELO3C006081
CsaV3_4G006480	Cp4.1LG01g00360	MELO3C006037
CsaV3_4G036610	Cp4.1LG02g05340	MELO3C014066
CsaV3_4G001260	Cp4.1LG02g16210	MELO3C014134
CsaV3_4G003030	Cp4.1LG03g12920	MELO3C012130
CsaV3_4G034570	Cp4.1LG06g01700	MELO3C007576
CsaV3_4G036610	Cp4.1LG06g03010	MELO3C003140
CsaV3_4G025110	Cp4.1LG10g08390	MELO3C007409
CsaV3_4G006110	Cp4.1LG14g02220	MELO3C007157
CsaV3_4G006480	Cp4.1LG14g02520	MELO3C011432
CsaV3_5G033090	Cp4.1LG01g12160	MELO3C015910
CsaV3_5G001010	Cp4.1LG05g06330	MELO3C005843
CsaV3_5G033090	Cp4.1LG09g02180	MELO3C026932
CsaV3_5G001010	Cp4.1LG13g02760	MELO3C016281
CsaV3_6G032480	Cp4.1LG07g00870	MELO3C016338
CsaV3_6G032100	Cp4.1LG07g05980	MELO3C012635
CsaV3_6G042200	Cp4.1LG10g03040	MELO3C018826
CsaV3_6G043450	Cp4.1LG10g02340	MELO3C018717
CsaV3_6G048830	Cp4.1LG10g09790	MELO3C019679
CsaV3_6G051490	Cp4.1LG10g05720	MELO3C020967
CsaV3_6G032100	Cp4.1LG11g03520	MELO3C015776
CsaV3_6G032480	Cp4.1LG11g03940	MELO3C010223
CsaV3_6G013820	Cp4.1LG16g07300	MELO3C010057
CsaV3_6G042280	Cp4.1LG19g11800	MELO3C007470
CsaV3_6G048830	Cp4.1LG19g07870	MELO3C007409
CsaV3_7G002670	Cp4.1LG04g03970	MELO3C002675
CsaV3_7G005750	Cp4.1LG04g02780	MELO3C002202
CsaV3_7G030110	Cp4.1LG12g06240
CsaV3_7G003470	Cp4.1LG15g07340
CsaV3_7G022650	Cp4.1LG15g08740
CsaV3_7G005750	Cp4.1LG15g08170
CsaV3_7G027490	Cp4.1LG17g06230
