# Supplementary material for: Genome-Wide Identification of the WRKY Gene Family and Functional Characterization of CpWRKY5 in Cucurbita pepo
Source: Int J Mol Sci. 2024 Apr 10;25(8):4177. doi: 10.3390/ijms25084177 (PMC11049939; doi:10.3390/ijms25084177)
Supplement: Supplementary file 1 [file ijms-25-04177-s001.zip › Table S5. Gene expression of Act and CpWRKYs in different treatments of C. pepo.xlsx]

## Sheet: Gene expression of Act and CpWR
Table S5. Gene expression of Act and CpWRKYs in different treatments of C. pepo
Sample Name	Gene Name	CT
CP8	Act	25.683
CP8	Act	25.7918
CP8	Act	25.1337
CP8	WRKY4	38.0691
CP8	WRKY4	35.6374
CP8	WRKY4	36.7475
CP8	WRKY5	26.589
CP8	WRKY5	26.8702
CP8	WRKY5	27.211
CP8	WRKY7	27.9824
CP8	WRKY7	28.0097
CP8	WRKY7	27.9057
CP8	WRKY12	26.2897
CP8	WRKY12	26.1347
CP8	WRKY12	26.1147
CP8	WRKY36	27.7647
CP8	WRKY36	27.7767
CP8	WRKY36	27.9244
CP8	WRKY52	35.3346
CP8	WRKY52	34.2078
CP8	WRKY52	35.4999
CP8	WRKY70	31.7711
CP8	WRKY70	31.8661
CP8	WRKY70	32.173
CP8	WRKY78	32.6467
CP8	WRKY78	32.7131
CP8	WRKY78	33.0562
CP18	Act	25.4317
CP18	Act	25.1356
CP18	Act	25.7278
CP18	WRKY4	34.1236
CP18	WRKY4	33.5722
CP18	WRKY4	34.2076
CP18	WRKY5	22.1024
CP18	WRKY5	21.5166
CP18	WRKY5	21.785
CP18	WRKY7	28.6111
CP18	WRKY7	28.5188
CP18	WRKY7	28.4037
CP18	WRKY12	27.3254
CP18	WRKY12	27.5299
CP18	WRKY12	27.7779
CP18	WRKY36	27.0927
CP18	WRKY36	27.4038
CP18	WRKY36	27.7148
CP18	WRKY52	33.7556
CP18	WRKY52	33.4519
CP18	WRKY52	33.7991
CP18	WRKY70	30.7559
CP18	WRKY70	30.5248
CP18	WRKY70	30.3274
CP18	WRKY78	29.812
CP18	WRKY78	29.8863
CP18	WRKY78	29.0663
CP28	Act	28.2388
CP28	Act	28.6076
CP28	Act	28.8663
CP28	WRKY4	33.9711
CP28	WRKY4	33.5239
CP28	WRKY4	33.7475
CP28	WRKY5	24.966
CP28	WRKY5	24.5241
CP28	WRKY5	24.8168
CP28	WRKY7	28.0642
CP28	WRKY7	27.7461
CP28	WRKY7	28.1356
CP28	WRKY12	27.4807
CP28	WRKY12	26.8066
CP28	WRKY12	27.3099
CP28	WRKY36	24.1398
CP28	WRKY36	24.3322
CP28	WRKY36	24.5245
CP28	WRKY52	32.7106
CP28	WRKY52	33.2792
CP28	WRKY52	32.8084
CP28	WRKY70	30.468
CP28	WRKY70	30.3399
CP28	WRKY70	30.6505
CP28	WRKY78	30.2186
CP28	WRKY78	30.5161
CP28	WRKY78	30.2017
HLCP8	Act	26.0088
HLCP8	Act	25.3797
HLCP8	Act	25.5815
HLCP8	WRKY4	33.235
HLCP8	WRKY4	33.4347
HLCP8	WRKY4	33.9854
HLCP8	WRKY5	23.7934
HLCP8	WRKY5	23.5337
HLCP8	WRKY5	23.6313
HLCP8	WRKY7	24.6961
HLCP8	WRKY7	24.4611
HLCP8	WRKY7	24.8351
HLCP8	WRKY12	23.18
HLCP8	WRKY12	22.6764
HLCP8	WRKY12	23.1039
HLCP8	WRKY36	22.2065
HLCP8	WRKY36	22.1261
HLCP8	WRKY36	22.0456
HLCP8	WRKY52	32.9788
HLCP8	WRKY52	31.3555
HLCP8	WRKY52	33.1437
HLCP8	WRKY70	31.2851
HLCP8	WRKY70	31.3289
HLCP8	WRKY70	31.3197
HLCP8	WRKY78	30.5582
HLCP8	WRKY78	30.6218
HLCP8	WRKY78	29.9984
HLCP18	Act	26.9661
HLCP18	Act	26.6379
HLCP18	Act	26.865
HLCP18	WRKY4	36.8038
HLCP18	WRKY4	37.7323
HLCP18	WRKY4	37.6972
HLCP18	WRKY5	24.5599
HLCP18	WRKY5	24.4067
HLCP18	WRKY5	24.3388
HLCP18	WRKY7	27.5969
HLCP18	WRKY7	27.9753
HLCP18	WRKY7	27.2324
HLCP18	WRKY12	24.012
HLCP18	WRKY12	24.5292
HLCP18	WRKY12	24.6614
HLCP18	WRKY36	23.8308
HLCP18	WRKY36	23.06
HLCP18	WRKY36	23.6858
HLCP18	WRKY52	32.6957
HLCP18	WRKY52	33.1679
HLCP18	WRKY52	32.6106
HLCP18	WRKY70	29.491
HLCP18	WRKY70	30.2302
HLCP18	WRKY70	31.5773
HLCP18	WRKY78	28.8782
HLCP18	WRKY78	30.4089
HLCP18	WRKY78	28.6993
HLCP28	Act	24.9157
HLCP28	Act	24.0132
HLCP28	Act	24.6143
HLCP28	WRKY4	32.6846
HLCP28	WRKY4	31.7831
HLCP28	WRKY4	32.7436
HLCP28	WRKY5	25.9689
HLCP28	WRKY5	25.9957
HLCP28	WRKY5	25.814
HLCP28	WRKY7	26.7231
HLCP28	WRKY7	25.7587
HLCP28	WRKY7	26.4156
HLCP28	WRKY12	26.4617
HLCP28	WRKY12	26.445
HLCP28	WRKY12	26.5005
HLCP28	WRKY36	27.6925
HLCP28	WRKY36	26.4725
HLCP28	WRKY36	26.2691
HLCP28	WRKY52	33.2086
HLCP28	WRKY52	32.9214
HLCP28	WRKY52	32.827
HLCP28	WRKY70	30.5936
HLCP28	WRKY70	29.8418
HLCP28	WRKY70	30.6329
HLCP28	WRKY78	30.7462
HLCP28	WRKY78	30.5327
HLCP28	WRKY78	31.4651

## Sheet: FPKM
Gene name	Treatment
	8 d	18 d	28 d	8 d	18 d	28 d
CpWRKY1	3.47	5.71	10.26	3.83	3.97	11.12
CpWRKY2	0.04	0.22	0.29	0.11	0.03	0.06
CpWRKY3	17.51	3.7	6.19	15.34	2.18	1.29
CpWRKY4	97.69	71.81	737.96	167.54	55.39	122.54
CpWRKY5	124.83	1201.97	1347.79	446.32	469.49	185.29
CpWRKY6	0	0	0	0	0	0
CpWRKY7	4.02	19.8	6.82	44.38	27.8	8.27
CpWRKY8	0.06	0.04	0.04	0.09	0.04	0
CpWRKY9	0	0	0	0	0	0
CpWRKY10	0.12	0.16	1.38	0.25	0.41	0.63
CpWRKY11	0.17	0.44	21.22	0.2	1.32	2.54
CpWRKY12	76.59	8.09	67.21	12.78	111.13	15.51
CpWRKY13	6.92	11.19	10.42	5.05	11.52	10.66
CpWRKY14	0.01	0	0	0.22	0	0
CpWRKY15	0	0	0	0	0	0
CpWRKY16	0	0	0	0	0	0
CpWRKY17	0.02	0.03	0.02	0	0.02	0
CpWRKY18	0.63	0.45	6.51	0.54	0.77	0.74
CpWRKY19	0.11	0.04	0.14	0.65	0.1	0
CpWRKY20	0.65	0.13	0.25	0.33	0.35	0.21
CpWRKY21	0.03	0	0.04	0.03	0	0
CpWRKY22	5.58	3.39	3.86	6.44	2.27	4.27
CpWRKY23	5.58	3.39	3.86	6.44	2.27	4.27
CpWRKY24	1.03	0.35	0.23	1.29	0.58	0.39
CpWRKY25	0	0	0.02	0.02	0	0.02
CpWRKY26	6.71	5.46	4.48	3.51	4.48	4.14
CpWRKY27	0.03	0	0.11	0.02	0	0
CpWRKY28	0.03	0.01	0.09	0.01	0.08	0.38
CpWRKY29	0.08	0.18	14.38	0.03	0.2	1.39
CpWRKY30	0.67	0.41	0.75	0	0.79	0.35
CpWRKY31	3.64	1.59	0.69	6.17	5.13	1.22
CpWRKY32	10.23	0.44	0	14.59	1.37	0
CpWRKY33	0.05	0	0.03	0	0	0
CpWRKY34	0.07	0	0	0.07	0	0
CpWRKY35	3.81	8.38	4.21	11.29	7.23	18.35
CpWRKY36	18.35	8.38	153.81	111.29	47.23	44.21
CpWRKY37	2.71	1.18	2.41	2.96	3.95	3.13
CpWRKY38	0.02	0.11	7.31	0.26	0.96	6.66
CpWRKY39	1.39	0.65	0.53	0.87	0.03	0.06
CpWRKY40	0	0	0	0.04	0	0
CpWRKY41	0	0	0	0.04	0	0
CpWRKY42	11.6	5.8	31.77	19.23	13.22	18.14
CpWRKY43	36.91	3.53	9.53	30.34	5.07	3.16
CpWRKY44	0	0	0	0	0	0
CpWRKY45	0	0.05	0	0.01	0.02	0.22
CpWRKY46	0.01	0.11	0.15	0	0.04	0.66
CpWRKY47	0.16	0.06	0.11	0.17	0.09	0.04
CpWRKY48	2.72	0.26	0.35	1.2	0.76	0.19
CpWRKY49	1.45	1.66	2.31	1.28	1.28	1.42
CpWRKY50	20.68	1.9	7.53	15.6	9.86	9.45
CpWRKY51	0	0	0	0	0	0
CpWRKY52	21.54	34.63	159.49	117.55	164.24	29.13
CpWRKY53	0.11	0	0	0.03	0	0.07
CpWRKY54	0.07	0.02	0.02	0.15	0.05	0.02
CpWRKY55	0	0	0	0	0.03	0.03
CpWRKY56	0	0	0	0	0	0
CpWRKY57	3.79	1.99	4.37	4.69	1.84	2.22
CpWRKY58	1.04	0	0.03	1.14	0.14	0.06
CpWRKY59	0	0	0	0	0	0
CpWRKY60	1.25	0.94	0	1.24	0.72	1.27
CpWRKY61	16.67	7.69	17.73	20.56	4.22	17.71
CpWRKY62	5.84	5.94	6.67	13.07	16.33	32.33
CpWRKY63	0	0.01	0.05	0.02	0	0.22
CpWRKY64	1.34	1.3	0.46	0	1.36	0
CpWRKY65	0.03	0.01	0.22	0.08	0.09	0.38
CpWRKY66	0	0	0	0	0	0
CpWRKY67	0.67	0	0.41	0.79	0.75	0.35
CpWRKY68	1.05	1.35	0.16	0.37	0.99	0
CpWRKY69	2.22	2.03	1.35	0	0	1.48
CpWRKY70	104.52	94.46	80.46	112.3	83.72	64.31
CpWRKY71	2.19	1.97	0.97	0	2.08	1.29
CpWRKY72	2.19	1.97	0.97	0	2.08	1.29
CpWRKY73	15.2	16.43	33.59	2.64	5.46	3.28
CpWRKY74	69.85	56.94	52.46	31.08	15.45	19.2
CpWRKY75	16.32	19.49	5.29	1.83	1.97	13.79
CpWRKY76	4.4	5.05	3.88	1.56	14.59	14.67
