# Supplementary material for: Genome-Wide Identification of the WRKY Gene Family and Functional Characterization of CpWRKY5 in Cucurbita pepo
Source: Int J Mol Sci. 2024 Apr 10;25(8):4177. doi: 10.3390/ijms25084177 (PMC11049939; doi:10.3390/ijms25084177)
Supplement: Supplementary file 1 [file ijms-25-04177-s001.zip › Table S6. Gene expression of lignin synthetic genes and lignin content in different tobacco lines.xlsx]

## Sheet: Gene expression
Table S6. Gene expression of HSC70-1 and lignin synthetic genes in different tobacco lines
Strain	Gene Name	CT
WT	NtPAL	27.1787
WT	NtPAL	27.3578
WT	NtPAL	27.2124
OE2	NtPAL	24.9772
OE2	NtPAL	24.6908
OE2	NtPAL	24.7689
OE3	NtPAL	23.3496
OE3	NtPAL	23.3664
OE3	NtPAL	23.3778
OE6	NtPAL	24.296
OE6	NtPAL	24.6444
OE6	NtPAL	24.1947
WT	NtCCoAOMT	29.082
WT	NtCCoAOMT	29.294
WT	NtCCoAOMT	29.0422
OE2	NtCCoAOMT	24.5311
OE2	NtCCoAOMT	24.6254
OE2	NtCCoAOMT	24.6639
OE3	NtCCoAOMT	26.2742
OE3	NtCCoAOMT	26.2193
OE3	NtCCoAOMT	26.4629
OE6	NtCCoAOMT	24.4866
OE6	NtCCoAOMT	24.4699
OE6	NtCCoAOMT	24.5496
WT	NtCOMT	29.2828
WT	NtCOMT	29.5469
WT	NtCOMT	29.8326
OE2	NtCOMT	26.9286
OE2	NtCOMT	27.4569
OE2	NtCOMT	27.5427
OE3	NtCOMT	27.1187
OE3	NtCOMT	27.1849
OE3	NtCOMT	27.1032
OE6	NtCOMT	26.8112
OE6	NtCOMT	26.7172
OE6	NtCOMT	27.6922
WT	NtCCR	33.6438
WT	NtCCR	33.7244
WT	NtCCR	32.7262
OE2	NtCCR	28.2636
OE2	NtCCR	28.6367
OE2	NtCCR	28.8361
OE3	NtCCR	29.0419
OE3	NtCCR	29.0335
OE3	NtCCR	28.2878
OE6	NtCCR	28.0478
OE6	NtCCR	28.1993
OE6	NtCCR	28.3241
WT	NtCAD	27.5455
WT	NtCAD	27.5253
WT	NtCAD	27.7382
OE2	NtCAD	24.1291
OE2	NtCAD	24.1971
OE2	NtCAD	24.1705
OE3	NtCAD	25.2725
OE3	NtCAD	25.1713
OE3	NtCAD	25.0769
OE6	NtCAD	24.6622
OE6	NtCAD	24.8219
OE6	NtCAD	24.8115
WT	NtC4H	27.5634
WT	NtC4H	27.4181
WT	NtC4H	27.6274
OE2	NtC4H	24.9847
OE2	NtC4H	25.0678
OE2	NtC4H	24.9138
OE3	NtC4H	24.5757
OE3	NtC4H	24.7486
OE3	NtC4H	24.7458
OE6	NtC4H	24.8092
OE6	NtC4H	24.8865
OE6	NtC4H	24.9297
WT	Nt4CL	32.4292
WT	Nt4CL	31.5563
WT	Nt4CL	31.9616
OE2	Nt4CL	27.0221
OE2	Nt4CL	27.4374
OE2	Nt4CL	27.2477
OE3	Nt4CL	28.1481
OE3	Nt4CL	28.8792
OE3	Nt4CL	30.4218
OE6	Nt4CL	30.6627
OE6	Nt4CL	28.7516
OE6	Nt4CL	28.3924
OE2	NtHSC70-1	23.2224
OE2	NtHSC70-1	23.151
OE2	NtHSC70-1	23.3048
OE3	NtHSC70-1	23.1142
OE3	NtHSC70-1	23.1617
OE3	NtHSC70-1	23.2789
OE6	NtHSC70-1	21.8707
OE6	NtHSC70-1	21.976
OE6	NtHSC70-1	21.8755
WT	NtHSC70-1	25.5228
WT	NtHSC70-1	25.5578
WT	NtHSC70-1	25.4846

## Sheet: Lignin content
lignin content in different tobacco lines
Strain	Lignin content (mg∙g−1)
WT	4.82696
WT	3.59882
WT	4.75841
OE2	19.165
OE2	23.4422
OE2	23.1923
OE3	17.5224
OE3	17.8722
OE3	17.1725
OE6	19.3082
OE6	19.9447
OE6	20.0716
