# Supplementary material for: Genome-Wide Identification of the WRKY Gene Family and Functional Characterization of CpWRKY5 in Cucurbita pepo
Source: Int J Mol Sci. 2024 Apr 10;25(8):4177. doi: 10.3390/ijms25084177 (PMC11049939; doi:10.3390/ijms25084177)
Supplement: Supplementary file 1 [file ijms-25-04177-s001.zip › Table S7. The primers used for genes expression analysis.xlsx]

## Sheet: Sheet1
Table S7. The primers used for genes expression analysis
Primer name	Sequence (5’-3’)
CpWRKY4-R	CAATAGTGAAAGGGTGC
CpWRKY4-F	GTGTAGGTAACGACGAAG
CpWRKY5-R	GCCAAGACGAGGACTG
CpWRKY5-F	TGACCGTTGTGGGAAT
CpWRKY7-R	CTACGCAGGAGGGTCA
CpWRKY7-F	AAGGCATCGGGCAAC
CpWRKY12-R	GCACTACTGCTGCTCG
CpWRKY12-F	TGAAATCTTGGGCTGA
CpWRKY36-R	AACGGCAGAACACCC
CpWRKY36-F	TCATCTTCGGCTAACAAT
CpWRKY52-R	TTGTCTTGTCTCGCCTCT
CpWRKY52-F	TGAAAGTAACGGTTTGTGG
CpWRKY70-R	CGCTTTCTGTTCTCGC
CpWRKY70-F	TGTGATTGTGGTGGGTTT
CpWRKY78-R	AACAATCTCCGTCTTGAACC
CpWRKY78-F	CACTTGCTGGACTTGCTTT
β-actin-R	CCTCAGGACAACGGAATC
β-actin-F	TCTCTATGCCAGTGGTCGTA
WRKY5-2300-F	AGAACACGGGGGACGAGCTCATGGAGGCCACCGGTTATCG
WRKY5-2300-R	ACCATGGTGTCGACTCTAGATTTTAAGAAACTGTCAACAAAAAAGTAAGGATC
NtPAL-F	CTCACTGGTTTTGGTGCTACT
NtPAL-R	AGGCTGCAACTCGAAAAATC
Nt4CL-F	GAACTCAAATCGAACGAATC
Nt4CL-R	ATGACCCTCCTGAAAATTGTTTAC
NtCCR-F	CCTCACTGGCTCTGCTAAAACAT
NtCCR-R	TTCTCTTGTAGGCTCTTCACCG
NtC4H-F	GGCAATCCCTCTTTTAGTCCC
NtC4H-R	CTCCTACCAACACCAAATGGA
NtCCoAOMT-F	AATGGTTCTGTGGTGGCTCC
NtCCoAOMT-R	CGGCGGCACAAGGTAATG
NtCOMT-F	GATGTTGGAGGTGGTCTTGGA
NtCOMT-R	CTGGTTTCACTGGTAAAATGGC
NtCAD-F	GAGGGTATGGCACCAGAACAA
NtCAD-R	GATGTCCCATTGCCTTTGCTAT
HSC70-1-F	AGGTGGAGACATGGGTGGTG
HSC70-1-R	TCATTAGGCACACAGATCTCTG
